# Supplementary material
Source: publisher figshare collection journal article supplement (https://acs.figshare.com/ndownloader/files/7716187)
Supplement: Supplementary file 1 [file 7716187]

 
#=============================================================================
 data_K2CeP2O8_STR-II_I41/amd_885K
#=============================================================================
  
# 1. SUBMISSION DETAILS
 
_publ_contact_author_name            'Dr. S. N. Achary'
_publ_contact_author_address 
           
; Chemistry Division
Bhabha Atomic Research Centre
Mumbai 400 085, India
;


_publ_contact_author_email           sachary@barc.gov.in
_publ_contact_author_fax             0091-22-25505151
_publ_contact_author_phone           0091-22-25592328
_publ_contact_letter
; ?
;

loop_
_publ_author_name
_publ_author_address

'Bevara, Samatha'
;Chemistry Division
Bhabha Atomic Research Centre
Mumbai
400085
India

;
'Achary, S. N.'
;Chemistry Division
Bhabha Atomic Research Centre
Mumbai
400085
India


;
'Tyagi, A. K.'
;Chemistry  Division 
Bhabha Atomic Research Centre
Mumbai
400 085
India
;

 
#=============================================================================
 
# 3. TITLE AND AUTHOR LIST
 
_publ_section_title
; 'crystal structure of K2Ce(PO4)2:'
;

#=============================================================================
 
# 5. CHEMICAL DATA


_chemical_name_common             'Potassium cerium phosphate'
_chemical_formula_moiety          'K 2 Ce 1 P 2 O 8'
_chemical_formula_structural      K2Ce(PO4)2
_chemical_formula_weight          408.26
_chemical_compound_source         'Synthetic'
_chemical_formula_sum             'Ce K2 O8 P2' 
 
                                        # natural products
 
loop_
    _atom_type_symbol               
    _atom_type_scat_Cromer_Mann_a1 
    _atom_type_scat_Cromer_Mann_b1 
    _atom_type_scat_Cromer_Mann_a2 
    _atom_type_scat_Cromer_Mann_b2 
    _atom_type_scat_Cromer_Mann_a3 
    _atom_type_scat_Cromer_Mann_b3 
    _atom_type_scat_Cromer_Mann_a4 
    _atom_type_scat_Cromer_Mann_b4 
    _atom_type_scat_Cromer_Mann_c 
    _atom_type_scat_dispersion_real 
    _atom_type_scat_dispersion_imag 
    _atom_type_scat_source          
ce+4  20.32350   2.65941  19.81860   0.21885  12.12330  15.79920
       0.14458  62.23550   1.59180  -0.56400   2.63200
 International_Tables_for_Crystallography_Vol.C(1991)_Tables_6.1.1.4_and_6.1.1.5
p      6.43450   1.90670   4.17910  27.15700   1.78000   0.52600
       1.49080  68.16450   1.11490   0.09000   0.09500
 International_Tables_for_Crystallography_Vol.C(1991)_Tables_6.1.1.4_and_6.1.1.5
k+1    7.95780  12.63310   7.49170   0.76740   6.35900  -0.00200
       1.19150  31.91280  -4.99780   0.17900   0.25000
 International_Tables_for_Crystallography_Vol.C(1991)_Tables_6.1.1.4_and_6.1.1.5
o-2    4.75800   7.83100   3.63700  30.05000   0.00000   0.00000
       0.00000   0.00000   1.59400   0.00800   0.00600
 International_Tables_for_Crystallography_Vol.C(1991)_Tables_6.1.1.4_and_6.1.1.5
 
#=============================================================================
 
# 6. POWDER SPECIMEN AND CRYSTAL DATA
 
_symmetry_cell_setting                Tetragonal
_symmetry_space_group_name_H-M       'I 41/a m d'
_symmetry_space_group_name_Hall      '-I 4bd 2'
 
loop_
    _symmetry_equiv_pos_as_xyz   #<--must include 'x,y,z'
'x,y,z'
'-y+1/4,x+3/4,z+1/4'
'-x+1/2,-y,z+1/2'
'y+1/4,-x+1/4,z+3/4'
'-x,y,z'
'y+3/4,x+3/4,z+1/4'
'x+1/2,-y,z+1/2'
'-y+3/4,-x+1/4,z+3/4'
'-x,-y,-z'
'y+3/4,-x+1/4,-z+3/4'
'x+1/2,y,-z+1/2'
'-y+3/4,x+3/4,-z+1/4'
'x,-y,-z'
'-y+1/4,-x+1/4,-z+3/4'
'-x+1/2,y,-z+1/2'
'y+1/4,x+3/4,-z+1/4'
'x+1/2,y+1/2,z+1/2'
'-y+3/4,x+1/4,z+3/4'
'-x,-y+1/2,z'
'y+3/4,-x+3/4,z+1/4'
'-x+1/2,y+1/2,z+1/2'
'y+1/4,x+1/4,z+3/4'
'x,-y+1/2,z'
'-y+1/4,-x+3/4,z+1/4'
'-x+1/2,-y+1/2,-z+1/2'
'y+1/4,-x+3/4,-z+1/4'
'x,y+1/2,-z'
'-y+1/4,x+1/4,-z+3/4'
'x+1/2,-y+1/2,-z+1/2'
'-y+3/4,-x+3/4,-z+1/4'
'-x,y+1/2,-z'
'y+3/4,x+1/4,-z+3/4'
 
_cell_length_a                       6.83658(3)
_cell_length_b                       6.83658(3)
_cell_length_c                       17.50908(12)
_cell_angle_alpha                    90.00000
_cell_angle_beta                     90.00000
_cell_angle_gamma                    90.00000
_cell_volume                         818.353(7)
_cell_formula_units_Z                4
_cell_measurement_temperature        885
_exptl_crystal_density_diffrn        3.31
 
#=============================================================================
 
# 7. EXPERIMENTAL DATA

_pd_instr_location
; INDUS-2, RRCAT, INDORE, India
;
_pd_calibration_special_details           # description of the method used
                                          # to calibrate the instrument
; ?
;
 
 
_diffrn_ambient_temperature          885
_diffrn_source                   'Synchrotron'  
_diffrn_radiation_type           'Synchrotron'  
_diffrn_radiation_wavelength          0.800542
_diffrn_source_type               'INDUS-2, RRCAT, India'
 
_diffrn_radiation_monochromator      DCM
_diffrn_measurement_device_type      'goniometer'

_diffrn_detector_type                'Scintillation counter'  
_pd_meas_scan_method                 'step'   # options are 'step', 'cont',
 
#  The following four items give details of the measured (not processed)
#  powder pattern.  Angles are in degrees.
 
_pd_meas_number_of_points         3995
_pd_meas_2theta_range_min         5.06000
_pd_meas_2theta_range_max         45.00000
_pd_meas_2theta_range_inc         0.010003
 
#=============================================================================
 
# 8. REFINEMENT DATA
 
 
_pd_proc_ls_prof_R_factor                9.1988
_pd_proc_ls_prof_wR_factor              11.7910
_pd_proc_ls_prof_wR_expected             4.7265
 
#  The following profile R-factors are CORRECTED for background
#  The sum is extended to all non-excluded points.
#  These items are not in the current CIF standard, but are defined above
 
_pd_proc_ls_prof_cR_factor               15.4273
_pd_proc_ls_prof_cwR_factor              16.8949
_pd_proc_ls_prof_cwR_expected             6.7725
 
#  The following items are not in the CIF standard, but are defined above
 
_pd_proc_ls_prof_chi2                 6.2232
_pd_proc_ls_prof_echi2                6.4457
_refine_ls_goodness_of_fit_all       2.4946
 
#  Items related to LS refinement
 
_refine_ls_R_I_factor                 7.4245
_refine_ls_number_reflns                   124
_refine_ls_number_parameters                37
 
# The following four items apply to angular dispersive measurements.
# 2theta minimum, maximum and increment (in degrees) are for the 
# intensities used in the refinement.
 
_pd_proc_2theta_range_min                5.0680
_pd_proc_2theta_range_max               45.0080
_pd_proc_2theta_range_inc              0.010003
_pd_proc_wavelength                    0.800542
 

_computing_structure_refinement      FULLPROF
 
#=============================================================================
 
# 9. ATOMIC COORDINATES AND DISPLACEMENT PARAMETERS
 
loop_
    _atom_site_label
    _atom_site_fract_x
    _atom_site_fract_y
    _atom_site_fract_z
    _atom_site_U_iso_or_equiv
    _atom_site_occupancy
    _atom_site_adp_type              # Not in version 2.0.1
    _atom_site_type_symbol
 Ce1   0.50000     0.25000     0.62500     0.0031(6)   1.00000    Uiso Ce
 P1   0.50000     0.75000     0.5579(3)   0.0283(17)  1.00000    Uiso P   
 K1   0.763(2)    0.75000     0.7364(7)   0.037(2)    0.50000    Uiso K 
 O1   0.50000     0.5745(7)   0.6112(4)   0.047(3)    1.00000    Uiso O 
 O2   0.3258(9)   0.75000     0.5026(3)   0.088(4)    1.00000    Uiso O 
 
# Note: if the displacement parameters were refined anisotropically
# the U matrices should be given as for single-crystal studies.
                                                 
#=============================================================================
 
data_K2CeP2O8_STR-I_P21/n_885K
 
#=============================================================================
 
# 5. CHEMICAL DATA
 
_chemical_name_common             'Potassium cerium phosphate'
_chemical_formula_moiety          'K 2 Ce 1 P 2 O 8'
_chemical_formula_structural      K2Ce(PO4)2
_chemical_formula_weight          408.26
_chemical_compound_source         'Synthetic'
_chemical_formula_sum             'Ce K2 O8 P2' 
 
 
_symmetry_cell_setting                Monoclinic
_symmetry_space_group_name_H-M       'P 1 21/n 1'
_symmetry_space_group_name_Hall      '-P 2yn'
 
loop_
    _symmetry_equiv_pos_as_xyz   #<--must include 'x,y,z'
'x,y,z'
'-x+1/2,y+1/2,-z+1/2'
'-x,-y,-z'
'x+1/2,-y+1/2,z+1/2'
 
_cell_length_a                       9.17610(20)
_cell_length_b                       10.8571(2)
_cell_length_c                       7.70959(16)
_cell_angle_alpha                    90.00000
_cell_angle_beta                     111.2885(16)
_cell_angle_gamma                    90.00000
_cell_volume                         715.66(3)
_cell_formula_units_Z                4
_cell_measurement_temperature        885
_exptl_crystal_density_diffrn        3.79
 
_diffrn_ambient_temperature          885

_diffrn_source                   'Synchrotron'  
_diffrn_radiation_type           'Synchrotron'  
_diffrn_radiation_wavelength          0.800542
 
_diffrn_radiation_monochromator      DCM
_diffrn_measurement_device_type      'goniometer'

_diffrn_detector_type                'Scintillation counter' 
_pd_meas_scan_method                 'step'   # options are 'step', 'cont',
 
#  The following four items give details of the measured (not processed)
#  powder pattern.  Angles are in degrees.
 
_pd_meas_2theta_range_min         5.06000
_pd_meas_2theta_range_max         45.00000
_pd_meas_2theta_range_inc         0.010003
 
 
_pd_proc_ls_prof_R_factor                9.1988
_pd_proc_ls_prof_wR_factor              11.7910
_pd_proc_ls_prof_wR_expected             4.7265
 
#  The following profile R-factors are CORRECTED for background
#  The sum is extended to all non-excluded points.
#  These items are not in the current CIF standard, but are defined above
 
_pd_proc_ls_prof_cR_factor               15.4273
_pd_proc_ls_prof_cwR_factor              16.8949
_pd_proc_ls_prof_cwR_expected             6.7725
 
#  The following items are not in the CIF standard, but are defined above
 
_pd_proc_ls_prof_chi2                 6.2232
_pd_proc_ls_prof_echi2                6.4457
_refine_ls_goodness_of_fit_all       2.4946
 
#  Items related to LS refinement
 
_refine_ls_R_I_factor                11.7249
_refine_ls_number_reflns                   681
_refine_ls_number_parameters                37
 
# The following four items apply to angular dispersive measurements.
# 2theta minimum, maximum and increment (in degrees) are for the 
# intensities used in the refinement.
 
_pd_proc_2theta_range_min                5.0680
_pd_proc_2theta_range_max               45.0080
_pd_proc_2theta_range_inc              0.010003
_pd_proc_wavelength                    0.800542
 

_computing_structure_refinement      FULLPROF


#=============================================================================
 
# 9. ATOMIC COORDINATES AND DISPLACEMENT PARAMETERS
 
loop_
    _atom_site_label
    _atom_site_fract_x
    _atom_site_fract_y
    _atom_site_fract_z
    _atom_site_U_iso_or_equiv
    _atom_site_occupancy
    _atom_site_adp_type              # Not in version 2.0.1
    _atom_site_type_symbol
 CE1   0.27763     0.14032     0.02227     0.00000     1.00000    Uiso CE
 K1   0.45202     0.12649     0.60380     0.00000     1.00000    Uiso K 
 K2   0.04146     0.11253     0.37300     0.00000     1.00000    Uiso K 
 P1   0.86904     0.13562     0.79970     0.00000     1.00000    Uiso P   
 O11   0.75854     0.24534     0.77823     0.00000     1.00000    Uiso O 
 O12   1.03906     0.13841     0.94067     0.00000     1.00000    Uiso O 
 O13   0.76409     0.02499     0.79897     0.00000     1.00000    Uiso O 
 O14   0.87305     0.13920     0.59986     0.00000     1.00000    Uiso O 
 P2   0.37105     0.86810     0.83118     0.00000     1.00000    Uiso P   
 O21   0.49561     0.85296     1.02187     0.00000     1.00000    Uiso O 
 O22   0.27740     0.75036     0.75827     0.00000     1.00000    Uiso O 
 O23   0.24738     0.97097     0.80792     0.00000     1.00000    Uiso O 
 O24   0.48457     0.89286     0.73197     0.00000     1.00000    Uiso O 
 
# Note: if the displacement parameters were refined anisotropically
# the U matrices should be given as for single-crystal studies.
 
#=============================================================================
 

#==============================================
# Powder diffraction pattern number   1
#==============================================
 
data_pd_block_id_15_9_612c
#==============================================================================
# 9. INSTRUMENT CHARACTERIZATION   
     
_diffrn_radiation_probe                x-ray 
_diffrn_radiation_wavelength            0.8005
     
#  The following profile R-factors are NOT CORRECTED for background
#  The sum is extended to all non-excluded points.
#  These are the current CIF standard
 
_pd_proc_ls_prof_R_factor                9.1988
_pd_proc_ls_prof_wR_factor              11.7910
_pd_proc_ls_prof_wR_expected             4.7265
 
#  The following profile R-factors are CORRECTED for background
#  The sum is extended to all non-excluded points.
#  These items are not in the current CIF standard, but are defined above
 
_pd_proc_ls_prof_cR_factor               15.4273
_pd_proc_ls_prof_cwR_factor              16.8949
_pd_proc_ls_prof_cwR_expected             6.7725
 
#  The following items are not in the CIF standard, but are defined above
 
_pd_proc_ls_prof_chi2                 6.2232
_pd_proc_ls_prof_echi2                6.4457
  
_pd_proc_ls_background_function   
;   FullProf Background function number  
; 
_exptl_absorpt_process_details  
;   FullProf Absorption/surface roughness correction    
 No correction is applied ?.   
; 

_pd_proc_ls_profile_function    
; pseudo-Voigt   
;  
_pd_proc_ls_peak_cutoff 0.00500
_pd_calc_method  "   Rietveld Refinement" 

#---- raw/calc data loop -----   
_pd_meas_2theta_range_min       5.060000
_pd_meas_2theta_range_max      45.000000
_pd_meas_2theta_range_inc       0.010003
_pd_proc_2theta_range_min       5.068040
_pd_proc_2theta_range_max      45.008041
_pd_proc_2theta_range_inc       0.010003
 
loop_
_pd_proc_point_id
_pd_proc_2theta_corrected
_pd_proc_intensity_total
_pd_calc_intensity_total
_pd_proc_intensity_bkg_calc

1 5.0680 577(24) 575.7743 575.7743
2 5.0780 592(24) 574.7095 574.7095
3 5.0880 578(24) 573.6467 573.6467
4 5.0980 594(24) 572.5858 572.5858
5 5.1080 643(25) 571.5268 571.5268
6 5.1180 602(25) 570.4697 570.4697
7 5.1280 633(25) 569.4146 569.4146
8 5.1380 564(24) 568.3614 568.3614
9 5.1480 574(24) 567.3101 567.3101
10 5.1580 620(25) 566.2607 566.2607
11 5.1680 534(23) 565.2133 565.2133
12 5.1780 551(23) 564.1677 564.1677
13 5.1880 600(24) 563.1240 563.1240
14 5.1980 588(24) 562.0823 562.0823
15 5.2080 605(25) 561.0424 561.0424
16 5.2180 578(24) 560.0045 560.0045
17 5.2280 608(25) 558.9684 558.9684
18 5.2380 552(23) 557.9343 557.9343
19 5.2480 610(25) 556.9020 556.9020
20 5.2580 580(24) 555.8716 555.8716
21 5.2680 533(23) 554.8431 554.8431
22 5.2780 597(24) 553.8166 553.8166
23 5.2880 549(23) 552.7918 552.7918
24 5.2980 545(23) 551.7690 551.7690
25 5.3080 571(24) 550.7480 550.7480
26 5.3180 594(24) 549.7290 549.7290
27 5.3280 590(24) 548.7118 548.7118
28 5.3380 547(23) 547.6965 547.6965
29 5.3480 568(24) 546.6830 546.6830
30 5.3580 589(24) 545.6714 545.6714
31 5.3680 518(23) 544.6616 544.6616
32 5.3780 545(23) 543.6538 543.6538
33 5.3880 552(23) 542.6478 542.6478
34 5.3980 555(24) 541.6436 541.6436
35 5.4080 564(24) 540.6413 540.6413
36 5.4180 512(23) 539.6409 539.6409
37 5.4280 568(24) 538.6423 538.6423
38 5.4380 559(24) 537.6455 537.6455
39 5.4480 577(24) 536.6506 536.6506
40 5.4580 585(24) 535.6576 535.6576
41 5.4680 542(23) 534.6663 534.6663
42 5.4780 552(23) 533.6769 533.6769
43 5.4880 503(22) 532.6894 532.6894
44 5.4980 568(24) 531.7037 531.7037
45 5.5080 570(24) 530.7198 530.7198
46 5.5180 570(24) 529.7377 529.7377
47 5.5280 524(23) 528.7575 528.7575
48 5.5380 541(23) 527.7791 527.7791
49 5.5480 608(25) 526.8025 526.8025
50 5.5580 527(23) 525.8277 525.8277
51 5.5680 537(23) 524.8548 524.8548
52 5.5780 506(22) 523.8836 523.8836
53 5.5880 538(23) 522.9143 522.9143
54 5.5980 513(23) 521.9468 521.9468
55 5.6080 498(22) 520.9811 520.9811
56 5.6180 485(22) 520.0172 520.0172
57 5.6280 512(23) 519.0551 519.0551
58 5.6380 583(24) 518.0948 518.0948
59 5.6480 560(24) 517.1364 517.1364
60 5.6580 517(23) 516.1796 516.1796
61 5.6680 545(23) 515.2247 515.2247
62 5.6780 495(22) 514.2715 514.2715
63 5.6880 551(23) 513.3203 513.3203
64 5.6980 532(23) 512.3707 512.3707
65 5.7080 524(23) 511.4229 511.4229
66 5.7180 560(24) 510.4770 510.4770
67 5.7280 511(23) 509.5328 509.5328
68 5.7380 532(23) 508.5903 508.5903
69 5.7480 498(22) 507.6497 507.6497
70 5.7580 518(23) 506.7108 506.7108
71 5.7680 505(22) 505.7737 505.7737
72 5.7780 509(23) 504.8384 504.8384
73 5.7880 527(23) 503.9048 503.9048
74 5.7980 494(22) 502.9730 502.9730
75 5.8080 485(22) 502.0429 502.0429
76 5.8180 459(21) 501.1147 501.1147
77 5.8280 475(22) 500.1881 500.1881
78 5.8380 495(22) 499.2634 499.2634
79 5.8480 533(23) 498.3403 498.3403
80 5.8580 521(23) 497.4191 497.4191
81 5.8680 508(23) 496.4995 496.4995
82 5.8780 480(22) 495.5818 495.5818
83 5.8880 490(22) 494.6657 494.6657
84 5.8980 510(23) 493.7514 493.7514
85 5.9080 511(23) 492.8388 492.8388
86 5.9180 519(23) 491.9280 491.9280
87 5.9280 491(22) 491.0189 491.0189
88 5.9380 481(22) 490.1116 490.1116
89 5.9480 544(23) 489.2059 489.2059
90 5.9580 491(22) 488.3020 488.3020
91 5.9680 480(22) 487.3998 487.3998
92 5.9780 459(21) 486.4994 486.4994
93 5.9880 488(22) 485.6006 485.6006
94 5.9980 474(22) 484.7036 484.7036
95 6.0080 446(21) 483.8083 483.8083
96 6.0180 464(22) 482.9147 482.9147
97 6.0280 431(21) 482.0228 482.0228
98 6.0380 461(21) 481.1326 481.1326
99 6.0480 425(21) 480.2442 480.2442
100 6.0580 481(22) 479.3574 479.3574
101 6.0680 450(21) 478.4724 478.4724
102 6.0780 476(22) 477.5890 477.5890
103 6.0880 473(22) 476.7073 476.7073
104 6.0980 465(22) 475.8273 475.8273
105 6.1080 481(22) 474.9491 474.9491
106 6.1180 463(22) 474.0725 474.0725
107 6.1280 473(22) 473.1976 473.1976
108 6.1380 491(22) 472.3244 472.3244
109 6.1480 470(22) 471.4529 471.4529
110 6.1580 440(21) 470.5830 470.5830
111 6.1680 474(22) 469.7148 469.7148
112 6.1780 424(21) 468.8483 468.8483
113 6.1880 424(21) 467.9883 467.9835
114 6.1980 442(21) 467.1253 467.1204
115 6.2080 448(21) 466.2641 466.2589
116 6.2180 456(21) 465.4045 465.3991
117 6.2280 502(22) 464.5466 464.5410
118 6.2380 457(21) 463.6903 463.6845
119 6.2480 449(21) 462.8358 462.8297
120 6.2580 498(22) 461.9829 461.9765
121 6.2680 470(22) 461.1317 461.1250
122 6.2780 435(21) 460.2822 460.2752
123 6.2880 435(21) 459.4343 459.4270
124 6.2980 421(21) 458.5881 458.5804
125 6.3080 447(21) 457.7436 457.7355
126 6.3180 446(21) 456.9008 456.8923
127 6.3280 445(21) 456.0918 456.0507
128 6.3380 478(22) 455.2536 455.2108
129 6.3480 422(21) 454.4171 454.3724
130 6.3580 446(21) 453.5825 453.5357
131 6.3680 449(21) 452.7496 452.7007
132 6.3780 463(22) 451.9185 451.8673
133 6.3880 455(21) 451.0892 451.0355
134 6.3980 429(21) 450.2618 450.2054
135 6.4080 434(21) 449.4362 449.3768
136 6.4180 467(22) 448.6124 448.5499
137 6.4280 473(22) 447.7905 447.7246
138 6.4380 435(21) 446.9706 446.9010
139 6.4480 440(21) 446.1526 446.0789
140 6.4580 440(21) 445.3366 445.2585
141 6.4680 462(21) 444.5226 444.4396
142 6.4780 432(21) 443.7108 443.6225
143 6.4880 424(21) 442.9011 442.8068
144 6.4980 424(21) 442.0937 441.9929
145 6.5080 437(21) 441.2886 441.1805
146 6.5180 433(21) 440.4861 440.3697
147 6.5280 479(22) 439.6864 439.5605
148 6.5380 451(21) 438.8897 438.7529
149 6.5480 419(20) 438.0966 437.9469
150 6.5580 417(20) 437.3078 437.1425
151 6.5680 408(20) 436.5245 436.3397
152 6.5780 410(20) 435.7489 435.5385
153 6.5880 426(21) 434.9855 434.7388
154 6.5980 421(21) 434.2451 433.9408
155 6.6080 453(21) 433.5583 433.1443
156 6.6180 402(20) 433.0060 432.3494
157 6.6280 465(22) 432.7774 431.5562
158 6.6380 431(21) 433.2172 430.7644
159 6.6480 451(21) 434.7509 429.9743
160 6.6580 479(22) 437.5405 429.1857
161 6.6680 399(20) 440.9510 428.3987
162 6.6780 437(21) 443.3637 427.6132
163 6.6880 450(21) 442.9269 426.8293
164 6.6980 447(21) 439.0118 426.0470
165 6.7080 379(19) 433.0847 425.2663
166 6.7180 449(21) 427.6909 424.4871
167 6.7280 435(21) 424.4160 423.7094
168 6.7380 444(21) 423.8755 422.9333
169 6.7480 390(20) 423.5463 422.1588
170 6.7580 382(20) 423.7577 421.3858
171 6.7680 438(21) 425.3575 420.6144
172 6.7780 409(20) 430.1440 419.8445
173 6.7880 458(21) 452.3600 419.0761
174 6.7980 450(21) 471.7719 418.3094
175 6.8080 466(22) 498.3823 417.5441
176 6.8180 524(23) 524.5121 416.7804
177 6.8280 564(24) 537.4814 416.0182
178 6.8380 519(23) 527.6976 415.2575
179 6.8480 486(22) 497.8471 414.4984
180 6.8580 432(21) 462.9785 413.7408
181 6.8680 418(20) 438.1424 412.9847
182 6.8780 432(21) 430.7570 412.2302
183 6.8880 438(21) 431.1203 411.4772
184 6.8980 408(20) 431.5910 410.7257
185 6.9080 409(20) 432.1826 409.9757
186 6.9180 398(20) 433.3546 409.2273
187 6.9280 430(21) 434.3724 408.4803
188 6.9380 384(20) 435.4082 407.7349
189 6.9480 414(20) 436.6343 406.9909
190 6.9580 459(21) 438.0972 406.2485
191 6.9680 430(21) 439.8261 405.5076
192 6.9780 464(22) 441.8628 404.7682
193 6.9880 398(20) 444.2639 404.0303
194 6.9980 407(20) 447.0977 403.2939
195 7.0080 418(20) 450.4473 402.5590
196 7.0180 419(20) 454.4136 401.8256
197 7.0280 436(21) 459.1226 401.0937
198 7.0380 440(21) 464.7336 400.3632
199 7.0480 454(21) 471.4502 399.6343
200 7.0580 434(21) 479.5388 398.9069
201 7.0680 468(22) 489.3566 398.1809
202 7.0780 485(22) 501.4158 397.4564
203 7.0880 466(22) 516.5105 396.7334
204 7.0980 547(23) 536.0037 396.0119
205 7.1080 550(23) 562.4246 395.2919
206 7.1180 575(24) 600.8700 394.5733
207 7.1280 733(27) 662.9881 393.8562
208 7.1380 822(29) 780.9284 393.1406
209 7.1480 1013(32) 1055.1179 392.4264
210 7.1580 1750(42) 1783.8101 391.7137
211 7.1680 3524(59) 3671.5183 391.0025
212 7.1780 7437(86) 7794.4155 390.2928
213 7.1880 13005(114) 14623.6680 389.5845
214 7.1980 19204(139) 22198.1562 388.8776
215 7.2080 23654(154) 25916.5195 388.1722
216 7.2180 22469(150) 22261.1543 387.4683
217 7.2280 12735(113) 13436.5752 386.7658
218 7.2380 4822(69) 5595.5972 386.0648
219 7.2480 2261(48) 1845.5067 385.3652
220 7.2580 1359(37) 961.1868 384.6671
221 7.2680 948(31) 907.8400 383.9704
222 7.2780 791(28) 840.7305 383.2751
223 7.2880 651(26) 730.9493 382.5813
224 7.2980 604(25) 653.8066 381.8890
225 7.3080 544(23) 609.8857 381.1980
226 7.3180 522(23) 579.1962 380.5085
227 7.3280 492(22) 552.5492 379.8205
228 7.3380 456(21) 528.6693 379.1339
229 7.3480 430(21) 507.9808 378.4486
230 7.3580 434(21) 490.5540 377.7649
231 7.3680 445(21) 476.0054 377.0825
232 7.3780 465(22) 463.9046 376.4016
233 7.3880 395(20) 453.7456 375.7220
234 7.3980 431(21) 445.1399 375.0439
235 7.4080 383(20) 437.7828 374.3672
236 7.4180 403(20) 431.4421 373.6920
237 7.4280 397(20) 427.1086 373.0181
238 7.4380 419(20) 422.3534 372.3457
239 7.4480 373(19) 418.1939 371.6746
240 7.4580 396(20) 414.5475 371.0050
241 7.4680 423(21) 411.3499 370.3368
242 7.4780 399(20) 408.5533 369.6700
243 7.4880 392(20) 406.1234 369.0045
244 7.4980 384(20) 404.0401 368.3405
245 7.5080 381(20) 402.2989 367.6779
246 7.5180 368(19) 400.9161 367.0166
247 7.5280 359(19) 399.9388 366.3568
248 7.5380 393(20) 399.4622 365.6983
249 7.5480 401(20) 399.6638 365.0412
250 7.5580 433(21) 400.8807 364.3855
251 7.5680 442(21) 403.8392 363.7312
252 7.5780 468(22) 410.3948 363.0783
253 7.5880 419(20) 425.7104 362.4268
254 7.5980 496(22) 463.4374 361.7766
255 7.6080 519(23) 554.1400 361.1278
256 7.6180 721(27) 750.0011 360.4804
257 7.6280 1010(32) 1106.2925 359.8344
258 7.6380 1586(40) 1622.6307 359.1897
259 7.6480 2257(48) 2171.8892 358.5464
260 7.6580 2851(53) 2495.4854 357.9044
261 7.6680 2932(54) 2394.6094 357.2639
262 7.6780 2178(47) 1861.7754 356.6246
263 7.6880 1204(35) 1173.7549 355.9868
264 7.6980 713(27) 647.0900 355.3503
265 7.7080 581(24) 394.6175 354.7152
266 7.7180 491(22) 360.6420 354.0814
267 7.7280 425(21) 360.6401 353.4489
268 7.7380 437(21) 371.9596 352.8179
269 7.7480 421(21) 377.8893 352.1881
270 7.7580 392(20) 377.4567 351.5598
271 7.7680 389(20) 376.3209 350.9327
272 7.7780 411(20) 376.0386 350.3070
273 7.7880 386(20) 376.5145 349.6826
274 7.7980 407(20) 377.6997 349.0596
275 7.8080 392(20) 379.9764 348.4379
276 7.8180 450(21) 384.2686 347.8176
277 7.8280 410(20) 392.7198 347.1985
278 7.8380 414(20) 411.0605 346.5809
279 7.8480 482(22) 454.7394 345.9645
280 7.8580 590(24) 560.2128 345.3495
281 7.8680 742(27) 795.0514 344.7357
282 7.8780 1223(35) 1242.8523 344.1234
283 7.8880 1931(44) 1932.8047 343.5123
284 7.8980 2875(54) 2732.2905 342.9026
285 7.9080 3803(62) 3316.9397 342.2941
286 7.9180 4068(64) 3334.3054 341.6870
287 7.9280 2831(53) 2697.3516 341.0812
288 7.9380 1576(40) 1730.4182 340.4767
289 7.9480 868(29) 910.1957 339.8736
290 7.9580 596(24) 468.9774 339.2717
291 7.9680 505(22) 341.0508 338.6711
292 7.9780 430(21) 340.3328 338.0719
293 7.9880 392(20) 359.6605 337.4739
294 7.9980 381(20) 366.0802 336.8773
295 8.0080 376(19) 363.4127 336.2819
296 8.0180 364(19) 359.5164 335.6878
297 8.0280 342(18) 356.6560 335.0950
298 8.0380 316(18) 354.4128 334.5036
299 8.0480 331(18) 352.2472 333.9134
300 8.0580 314(18) 350.0267 333.3245
301 8.0680 316(18) 347.8202 332.7368
302 8.0780 341(18) 345.7157 332.1505
303 8.0880 366(19) 343.7629 331.5655
304 8.0980 339(18) 341.9758 330.9817
305 8.1080 345(19) 340.3470 330.3992
306 8.1180 328(18) 338.8597 329.8180
307 8.1280 315(18) 337.4944 329.2381
308 8.1380 314(18) 336.2330 328.6594
309 8.1480 321(18) 335.0594 328.0820
310 8.1580 328(18) 333.9605 327.5059
311 8.1680 311(18) 332.9250 326.9311
312 8.1780 344(19) 331.9442 326.3575
313 8.1880 347(19) 330.2561 325.7851
314 8.1980 318(18) 329.3921 325.2141
315 8.2080 316(18) 328.5627 324.6443
316 8.2180 340(18) 327.7639 324.0757
317 8.2280 301(17) 326.9925 323.5084
318 8.2380 283(17) 326.2458 322.9424
319 8.2480 346(19) 325.5218 322.3776
320 8.2580 325(18) 324.8188 321.8141
321 8.2680 320(18) 324.1357 321.2518
322 8.2780 306(17) 323.4717 320.6907
323 8.2880 330(18) 322.8267 320.1310
324 8.2980 306(17) 322.2010 319.5724
325 8.3080 276(17) 321.5960 319.0151
326 8.3180 295(17) 321.0145 318.4590
327 8.3280 325(18) 320.4616 317.9042
328 8.3380 331(18) 319.9461 317.3506
329 8.3480 297(17) 319.4839 316.7982
330 8.3580 316(18) 319.1042 316.2471
331 8.3680 320(18) 318.8702 315.6973
332 8.3780 310(18) 318.9435 315.1486
333 8.3880 285(17) 319.7720 314.6011
334 8.3980 327(18) 322.5176 314.0549
335 8.4080 339(18) 329.6858 313.5099
336 8.4180 304(17) 345.2688 312.9661
337 8.4280 357(19) 372.8067 312.4236
338 8.4380 400(20) 409.4014 311.8822
339 8.4480 441(21) 445.7509 311.3421
340 8.4580 515(23) 462.1799 310.8032
341 8.4680 502(22) 445.9212 310.2655
342 8.4780 435(21) 403.2839 309.7290
343 8.4880 347(19) 357.0515 309.1938
344 8.4980 330(18) 325.8994 308.6597
345 8.5080 320(18) 312.3527 308.1268
346 8.5180 329(18) 309.0151 307.5951
347 8.5280 342(18) 308.6856 307.0646
348 8.5380 339(18) 308.3056 306.5354
349 8.5480 275(17) 307.5691 306.0073
350 8.5580 288(17) 306.7934 305.4804
351 8.5680 303(17) 306.1052 304.9547
352 8.5780 333(18) 305.4756 304.4303
353 8.5880 342(18) 304.8622 303.9070
354 8.5980 345(19) 304.2497 303.3848
355 8.6080 353(19) 303.6393 302.8639
356 8.6180 293(17) 303.0355 302.3442
357 8.6280 343(19) 302.4412 301.8256
358 8.6380 291(17) 301.8574 301.3082
359 8.6480 293(17) 301.2836 300.7920
360 8.6580 302(17) 300.7191 300.2770
361 8.6680 279(17) 300.1625 299.7632
362 8.6780 275(17) 299.6128 299.2505
363 8.6880 300(17) 299.0691 298.7389
364 8.6980 303(17) 298.5308 298.2286
365 8.7080 282(17) 297.9969 297.7195
366 8.7180 293(17) 297.4671 297.2115
367 8.7280 305(17) 296.9409 296.7046
368 8.7380 298(17) 296.4180 296.1989
369 8.7480 304(17) 295.8981 295.6944
370 8.7580 268(16) 295.3809 295.1911
371 8.7680 277(17) 294.8662 294.6889
372 8.7780 299(17) 294.3538 294.1878
373 8.7880 288(17) 293.8437 293.6880
374 8.7980 246(16) 293.3356 293.1892
375 8.8080 301(17) 292.8295 292.6916
376 8.8180 283(17) 292.3253 292.1952
377 8.8280 288(17) 291.8229 291.6999
378 8.8380 257(16) 291.3221 291.2057
379 8.8480 300(17) 290.8230 290.7127
380 8.8580 261(16) 290.3255 290.2209
381 8.8680 278(17) 289.8297 289.7302
382 8.8780 262(16) 289.3352 289.2406
383 8.8880 265(16) 288.8423 288.7521
384 8.8980 308(18) 288.3508 288.2648
385 8.9080 274(17) 287.8608 287.7787
386 8.9180 281(17) 287.3721 287.2936
387 8.9280 271(16) 286.8848 286.8097
388 8.9380 265(16) 286.3988 286.3268
389 8.9480 265(16) 285.9142 285.8452
390 8.9580 248(16) 285.4308 285.3647
391 8.9680 283(17) 284.9487 284.8852
392 8.9780 278(17) 284.4069 284.4069
393 8.9880 263(16) 283.9297 283.9297
394 8.9980 239(15) 283.4537 283.4537
395 9.0080 278(17) 282.9787 282.9787
396 9.0180 299(17) 282.5049 282.5049
397 9.0280 251(16) 282.0321 282.0321
398 9.0380 258(16) 281.5605 281.5605
399 9.0480 249(16) 281.0900 281.0900
400 9.0580 237(15) 280.6206 280.6206
401 9.0680 266(16) 280.1523 280.1523
402 9.0780 251(16) 279.6851 279.6851
403 9.0880 256(16) 279.2190 279.2190
404 9.0980 266(16) 278.7540 278.7540
405 9.1080 252(16) 278.2901 278.2901
406 9.1180 298(17) 277.8273 277.8273
407 9.1280 289(17) 277.3656 277.3656
408 9.1380 271(16) 276.9050 276.9050
409 9.1480 300(17) 276.4454 276.4454
410 9.1580 257(16) 275.9870 275.9870
411 9.1680 267(16) 275.5297 275.5297
412 9.1780 263(16) 275.0734 275.0734
413 9.1880 278(17) 274.6182 274.6182
414 9.1980 251(16) 274.1641 274.1641
415 9.2080 274(17) 273.7111 273.7111
416 9.2180 249(16) 273.2591 273.2591
417 9.2280 259(16) 272.8083 272.8083
418 9.2380 279(17) 272.3585 272.3585
419 9.2480 232(15) 271.9098 271.9098
420 9.2580 294(17) 271.4621 271.4621
421 9.2680 268(16) 271.1849 271.0155
422 9.2780 269(16) 270.7467 270.5700
423 9.2880 233(15) 270.3100 270.1256
424 9.2980 254(16) 269.8749 269.6822
425 9.3080 243(16) 269.4414 269.2399
426 9.3180 256(16) 269.0097 268.7986
427 9.3280 273(17) 268.5797 268.3585
428 9.3380 245(16) 268.1514 267.9193
429 9.3480 257(16) 267.7251 267.4812
430 9.3580 254(16) 267.3007 267.0442
431 9.3680 262(16) 266.8784 266.6082
432 9.3780 272(16) 266.4582 266.1733
433 9.3880 250(16) 266.0403 265.7394
434 9.3980 282(17) 265.6248 265.3066
435 9.4080 239(15) 265.2120 264.8748
436 9.4180 237(15) 264.8019 264.4441
437 9.4280 266(16) 264.3948 264.0144
438 9.4380 235(15) 263.9910 263.5858
439 9.4480 243(16) 263.5908 263.1582
440 9.4580 281(17) 263.1943 262.7316
441 9.4680 249(16) 262.8022 262.3061
442 9.4780 249(16) 262.4149 261.8816
443 9.4880 228(15) 262.0330 261.4581
444 9.4980 266(16) 261.6570 261.0357
445 9.5080 257(16) 261.2879 260.6143
446 9.5180 286(17) 260.9267 260.1939
447 9.5280 249(16) 260.5747 259.7745
448 9.5380 258(16) 260.2333 259.3562
449 9.5480 255(16) 259.9047 258.9389
450 9.5580 272(16) 259.5911 258.5226
451 9.5680 267(16) 259.7260 258.1073
452 9.5780 267(16) 259.4730 257.6931
453 9.5880 245(16) 259.2513 257.2799
454 9.5980 236(15) 259.0716 256.8676
455 9.6080 252(16) 258.9509 256.4565
456 9.6180 271(16) 258.9173 256.0463
457 9.6280 287(17) 259.0186 255.6371
458 9.6380 250(16) 259.3438 255.2289
459 9.6480 242(16) 260.0879 254.8217
460 9.6580 255(16) 261.7590 254.4156
461 9.6680 263(16) 265.7519 254.0104
462 9.6780 259(16) 275.5315 253.6062
463 9.6880 285(17) 297.9702 253.2031
464 9.6980 344(19) 342.3602 252.8009
465 9.7080 400(20) 413.2645 252.3998
466 9.7180 470(22) 498.1867 251.9996
467 9.7280 485(22) 562.7739 251.6004
468 9.7380 505(22) 568.0127 251.2023
469 9.7480 423(21) 503.7060 250.8051
470 9.7580 355(19) 405.9462 250.4088
471 9.7680 341(18) 324.7837 250.0136
472 9.7780 301(17) 280.5005 249.6194
473 9.7880 307(18) 263.8161 249.2261
474 9.7980 247(16) 258.8077 248.8339
475 9.8080 226(15) 256.5506 248.4426
476 9.8180 238(15) 254.8130 248.0522
477 9.8280 247(16) 253.5795 247.6629
478 9.8380 237(15) 252.8167 247.2746
479 9.8480 266(16) 252.3155 246.8872
480 9.8580 257(16) 251.9252 246.5007
481 9.8680 267(16) 251.6021 246.1153
482 9.8780 225(15) 251.3584 245.7309
483 9.8880 262(16) 251.2247 245.3473
484 9.8980 241(16) 251.2414 244.9648
485 9.9080 317(18) 251.4661 244.5832
486 9.9180 247(16) 251.9923 244.2026
487 9.9280 251(16) 252.9877 243.8229
488 9.9380 237(15) 254.7967 243.4442
489 9.9480 275(17) 258.2700 243.0665
490 9.9580 279(17) 265.7449 242.6897
491 9.9680 276(17) 283.3496 242.3139
492 9.9780 308(18) 327.7378 241.9390
493 9.9880 404(20) 413.9234 241.5651
494 9.9980 594(24) 563.0214 241.1921
495 10.0080 786(28) 762.2145 240.8201
496 10.0180 1119(33) 945.1606 240.4490
497 10.0280 1239(35) 1013.7391 240.0789
498 10.0380 1056(32) 911.6412 239.7097
499 10.0480 651(26) 691.6077 239.3415
500 10.0580 447(21) 477.2409 238.9741
501 10.0680 356(19) 344.5295 238.6078
502 10.0780 322(18) 287.8548 238.2424
503 10.0880 290(17) 269.4364 237.8779
504 10.0980 301(17) 262.4527 237.5143
505 10.1080 259(16) 258.0255 237.1516
506 10.1180 231(15) 255.4298 236.7900
507 10.1280 245(16) 253.9880 236.4292
508 10.1380 270(16) 253.3743 236.0693
509 10.1480 249(16) 253.1226 235.7104
510 10.1580 276(17) 253.3192 235.3524
511 10.1680 224(15) 253.4585 234.9953
512 10.1780 258(16) 253.8387 234.6392
513 10.1880 231(15) 254.5155 234.2840
514 10.1980 247(16) 255.5445 233.9297
515 10.2080 273(17) 256.9899 233.5763
516 10.2180 252(16) 258.9355 233.2238
517 10.2280 258(16) 261.4987 232.8722
518 10.2380 279(17) 264.6938 232.5216
519 10.2480 247(16) 269.1318 232.1718
520 10.2580 280(17) 275.1424 231.8230
521 10.2680 283(17) 283.6749 231.4750
522 10.2780 308(18) 296.7174 231.1280
523 10.2880 350(19) 319.1392 230.7819
524 10.2980 389(20) 365.4841 230.4367
525 10.3080 510(23) 478.8876 230.0924
526 10.3180 767(28) 769.8535 229.7489
527 10.3280 1381(37) 1418.9021 229.4064
528 10.3380 2530(50) 2507.3809 229.0648
529 10.3480 3595(60) 3684.3643 228.7241
530 10.3580 4197(65) 4158.0571 228.3842
531 10.3680 3217(57) 3432.8113 228.0453
532 10.3780 1793(42) 2105.1895 227.7073
533 10.3880 1014(32) 1117.9635 227.3701
534 10.3980 641(25) 657.5818 227.0338
535 10.4080 501(22) 472.0882 226.6984
536 10.4180 465(22) 381.5538 226.3639
537 10.4280 365(19) 333.7866 226.0303
538 10.4380 344(19) 311.6456 225.6975
539 10.4480 334(18) 303.2813 225.3657
540 10.4580 312(18) 306.6300 225.0347
541 10.4680 367(19) 331.1833 224.7046
542 10.4780 474(22) 391.2698 224.3754
543 10.4880 655(26) 485.4655 224.0470
544 10.4980 867(29) 565.0983 223.7195
545 10.5080 805(28) 565.4674 223.3929
546 10.5180 556(24) 475.3670 223.0672
547 10.5280 445(21) 368.9187 222.7423
548 10.5380 337(18) 305.5002 222.4183
549 10.5480 323(18) 280.9336 222.0951
550 10.5580 301(17) 277.3368 221.7728
551 10.5680 329(18) 291.9073 221.4514
552 10.5780 338(18) 333.8517 221.1309
553 10.5880 378(19) 412.7433 220.8111
554 10.5980 485(22) 522.5013 220.4923
555 10.6080 613(25) 627.4139 220.1743
556 10.6180 668(26) 671.7262 219.8572
557 10.6280 608(25) 620.2111 219.5409
558 10.6380 443(21) 499.0276 219.2254
559 10.6480 357(19) 377.7869 218.9108
560 10.6580 315(18) 301.1874 218.5971
561 10.6680 266(16) 267.6028 218.2842
562 10.6780 276(17) 257.2658 217.9722
563 10.6880 296(17) 257.2313 217.6609
564 10.6980 301(17) 266.7259 217.3506
565 10.7080 333(18) 293.5186 217.0411
566 10.7180 343(19) 348.4555 216.7324
567 10.7280 404(20) 436.1501 216.4245
568 10.7380 537(23) 539.2913 216.1176
569 10.7480 556(24) 614.2410 215.8114
570 10.7580 610(25) 614.6952 215.5060
571 10.7680 560(24) 531.3066 215.2015
572 10.7780 358(19) 420.8119 214.8978
573 10.7880 300(17) 338.5703 214.5950
574 10.7980 356(19) 303.9821 214.2930
575 10.8080 359(19) 311.2688 213.9918
576 10.8180 497(22) 368.3922 213.6914
577 10.8280 728(27) 528.9569 213.3919
578 10.8380 1290(36) 887.4577 213.0931
579 10.8480 2152(46) 1473.1804 212.7952
580 10.8580 2971(55) 2071.7397 212.4981
581 10.8680 3310(58) 2254.2886 212.2019
582 10.8780 2369(49) 1809.3221 211.9064
583 10.8880 1352(37) 1119.5256 211.6118
584 10.8980 788(28) 645.3215 211.3179
585 10.9080 529(23) 428.3024 211.0249
586 10.9180 408(20) 335.7380 210.7327
587 10.9280 344(19) 288.8934 210.4413
588 10.9380 328(18) 264.6786 210.1507
589 10.9480 284(17) 252.5295 209.8609
590 10.9580 260(16) 245.1942 209.5719
591 10.9680 267(16) 239.5262 209.2838
592 10.9780 270(16) 234.7669 208.9964
593 10.9880 233(15) 230.8028 208.7098
594 10.9980 258(16) 227.5523 208.4240
595 11.0080 234(15) 224.8996 208.1390
596 11.0180 222(15) 222.7274 207.8548
597 11.0280 214(15) 220.9400 207.5714
598 11.0380 206(14) 219.4688 207.2888
599 11.0480 203(14) 218.2720 207.0070
600 11.0580 204(14) 217.3357 206.7260
601 11.0680 231(15) 216.6824 206.4458
602 11.0780 232(15) 216.4076 206.1663
603 11.0880 208(14) 216.8033 205.8876
604 11.0980 234(15) 218.7077 205.6098
605 11.1080 255(16) 223.9695 205.3327
606 11.1180 247(16) 237.3035 205.0564
607 11.1280 260(16) 263.4106 204.7808
608 11.1380 346(19) 303.8819 204.5061
609 11.1480 384(20) 349.4189 204.2321
610 11.1580 432(21) 379.0668 203.9589
611 11.1680 406(20) 372.7803 203.6865
612 11.1780 316(18) 331.1263 203.4148
613 11.1880 245(16) 279.3600 203.1439
614 11.1980 206(14) 241.5233 202.8738
615 11.2080 230(15) 222.1326 202.6044
616 11.2180 213(15) 214.0580 202.3359
617 11.2280 211(15) 210.4071 202.0680
618 11.2380 229(15) 208.0024 201.8010
619 11.2480 204(14) 206.5947 201.5347
620 11.2580 193(14) 205.6832 201.2692
621 11.2680 179(13) 203.2949 201.0044
622 11.2780 211(15) 202.8177 200.7404
623 11.2880 196(14) 202.3688 200.4772
624 11.2980 189(14) 201.9383 200.2146
625 11.3080 186(14) 201.5297 199.9529
626 11.3180 192(14) 201.1460 199.6919
627 11.3280 207(14) 200.7873 199.4317
628 11.3380 167(13) 200.4521 199.1722
629 11.3480 207(14) 200.1384 198.9135
630 11.3580 182(13) 199.8444 198.6555
631 11.3680 174(13) 199.5687 198.3982
632 11.3780 229(15) 199.3106 198.1417
633 11.3880 211(15) 199.0702 197.8860
634 11.3980 218(15) 198.8485 197.6309
635 11.4080 201(14) 198.6475 197.3767
636 11.4180 187(14) 198.4707 197.1231
637 11.4280 186(14) 198.3241 196.8703
638 11.4380 193(14) 198.2178 196.6183
639 11.4480 187(14) 198.1692 196.3670
640 11.4580 204(14) 198.2078 196.1164
641 11.4680 214(15) 198.3889 195.8665
642 11.4780 216(15) 198.8323 195.6174
643 11.4880 209(14) 199.8469 195.3690
644 11.4980 210(14) 202.2774 195.1213
645 11.5080 209(14) 208.1954 194.8743
646 11.5180 220(15) 221.5503 194.6281
647 11.5280 222(15) 247.1172 194.3826
648 11.5380 272(16) 285.6945 194.1379
649 11.5480 289(17) 327.5751 193.8938
650 11.5580 286(17) 352.6603 193.6505
651 11.5680 325(18) 343.3434 193.4079
652 11.5780 280(17) 302.9099 193.1660
653 11.5880 239(15) 256.2652 192.9248
654 11.5980 213(15) 223.7843 192.6843
655 11.6080 210(14) 207.5612 192.4446
656 11.6180 177(13) 200.6853 192.2056
657 11.6280 195(14) 197.4215 191.9672
658 11.6380 201(14) 195.5007 191.7296
659 11.6480 187(14) 194.2159 191.4927
660 11.6580 206(14) 193.4881 191.2565
661 11.6680 194(14) 192.9630 191.0210
662 11.6780 170(13) 192.5055 190.7862
663 11.6880 175(13) 192.0712 190.5521
664 11.6980 204(14) 191.6550 190.3187
665 11.7080 220(15) 191.2598 190.0860
666 11.7180 194(14) 190.8870 189.8540
667 11.7280 183(14) 190.5356 189.6227
668 11.7380 168(13) 190.2031 189.3921
669 11.7480 189(14) 189.8867 189.1622
670 11.7580 209(14) 189.5838 188.9330
671 11.7680 215(15) 189.2921 188.7045
672 11.7780 213(15) 189.0097 188.4766
673 11.7880 170(13) 188.7353 188.2495
674 11.7980 179(13) 188.4675 188.0230
675 11.8080 182(13) 188.2055 187.7973
676 11.8180 162(13) 187.9484 187.5722
677 11.8280 178(13) 187.6956 187.3478
678 11.8380 181(13) 187.4465 187.1241
679 11.8480 197(14) 187.2008 186.9010
680 11.8580 168(13) 186.9581 186.6787
681 11.8680 186(14) 186.7181 186.4570
682 11.8780 186(14) 186.4804 186.2360
683 11.8880 186(14) 186.2450 186.0157
684 11.8980 180(13) 186.0116 185.7961
685 11.9080 186(14) 185.7801 185.5771
686 11.9180 166(13) 185.5504 185.3588
687 11.9280 175(13) 185.3222 185.1411
688 11.9380 174(13) 185.0955 184.9242
689 11.9480 200(14) 184.8703 184.7079
690 11.9580 189(14) 184.6464 184.4923
691 11.9680 195(14) 184.4238 184.2773
692 11.9780 157(13) 184.2024 184.0630
693 11.9880 184(14) 183.9822 183.8494
694 11.9980 198(14) 183.7631 183.6364
695 12.0080 182(13) 183.5451 183.4241
696 12.0180 195(14) 183.3281 183.2124
697 12.0280 189(14) 183.1121 183.0014
698 12.0380 183(14) 182.7911 182.7911
699 12.0480 176(13) 182.5814 182.5814
700 12.0580 205(14) 182.3724 182.3724
701 12.0680 208(14) 182.1640 182.1640
702 12.0780 195(14) 181.9563 181.9563
703 12.0880 204(14) 181.7493 181.7493
704 12.0980 156(12) 181.5428 181.5428
705 12.1080 225(15) 181.3370 181.3370
706 12.1180 198(14) 181.1319 181.1319
707 12.1280 154(12) 180.9274 180.9274
708 12.1380 195(14) 180.7236 180.7236
709 12.1480 177(13) 180.5204 180.5204
710 12.1580 180(13) 180.3178 180.3178
711 12.1680 183(14) 180.1159 180.1159
712 12.1780 185(14) 179.9146 179.9146
713 12.1880 157(13) 179.7140 179.7140
714 12.1980 171(13) 179.5140 179.5140
715 12.2080 172(13) 179.3146 179.3146
716 12.2180 189(14) 179.1159 179.1159
717 12.2280 164(13) 178.9178 178.9178
718 12.2380 155(12) 178.7203 178.7203
719 12.2480 193(14) 178.5256 178.5235
720 12.2580 189(14) 178.3294 178.3273
721 12.2680 191(14) 178.1339 178.1317
722 12.2780 167(13) 177.9391 177.9367
723 12.2880 182(13) 177.7449 177.7424
724 12.2980 205(14) 177.5513 177.5487
725 12.3080 172(13) 177.3583 177.3556
726 12.3180 179(13) 177.1660 177.1631
727 12.3280 162(13) 176.9743 176.9713
728 12.3380 178(13) 176.7833 176.7800
729 12.3480 190(14) 176.5928 176.5894
730 12.3580 192(14) 176.4030 176.3994
731 12.3680 160(13) 176.2139 176.2101
732 12.3780 188(14) 176.0925 176.0213
733 12.3880 163(13) 175.9078 175.8331
734 12.3980 165(13) 175.7239 175.6456
735 12.4080 177(13) 175.5409 175.4587
736 12.4180 173(13) 175.3588 175.2723
737 12.4280 167(13) 175.1777 175.0866
738 12.4380 176(13) 174.9975 174.9015
739 12.4480 201(14) 174.8184 174.7170
740 12.4580 162(13) 174.6403 174.5331
741 12.4680 167(13) 174.4633 174.3498
742 12.4780 170(13) 174.2876 174.1671
743 12.4880 160(13) 174.1190 173.9850
744 12.4980 179(13) 173.9462 173.8035
745 12.5080 186(14) 173.7748 173.6226
746 12.5180 185(14) 173.6051 173.4423
747 12.5280 173(13) 173.4371 173.2626
748 12.5380 179(13) 173.2712 173.0835
749 12.5480 150(12) 173.1074 172.9050
750 12.5580 179(13) 172.9462 172.7270
751 12.5680 154(12) 172.7879 172.5497
752 12.5780 159(13) 172.6334 172.3730
753 12.5880 134(12) 172.4834 172.1968
754 12.5980 174(13) 172.3398 172.0212
755 12.6080 168(13) 172.2057 171.8462
756 12.6180 177(13) 172.0891 171.6718
757 12.6280 166(13) 172.0105 171.4980
758 12.6380 172(13) 172.0165 171.3248
759 12.6480 174(13) 172.1855 171.1521
760 12.6580 188(14) 172.5881 170.9800
761 12.6680 193(14) 173.1814 170.8085
762 12.6780 181(13) 173.7206 170.6376
763 12.6880 177(13) 173.8491 170.4672
764 12.6980 168(13) 173.3980 170.2975
765 12.7080 171(13) 172.6452 170.1283
766 12.7180 160(13) 172.0658 169.9596
767 12.7280 175(13) 171.9035 169.7916
768 12.7380 183(14) 172.2476 169.6241
769 12.7480 162(13) 173.4153 169.4572
770 12.7580 203(14) 176.4138 169.2908
771 12.7680 194(14) 183.2997 169.1250
772 12.7780 235(15) 196.6147 168.9598
773 12.7880 269(16) 216.7573 168.7952
774 12.7980 296(17) 238.4131 168.6311
775 12.8080 325(18) 250.7379 168.4675
776 12.8180 327(18) 244.6180 168.3046
777 12.8280 289(17) 222.9440 168.1422
778 12.8380 217(15) 199.5610 167.9803
779 12.8480 217(15) 183.9789 167.8190
780 12.8580 190(14) 176.2299 167.6583
781 12.8680 180(13) 172.9046 167.4981
782 12.8780 183(14) 171.7335 167.3385
783 12.8880 183(14) 171.9656 167.1794
784 12.8980 187(14) 173.1817 167.0209
785 12.9080 202(14) 174.5575 166.8629
786 12.9180 206(14) 174.9723 166.7055
787 12.9280 182(13) 173.7582 166.5486
788 12.9380 189(14) 171.4651 166.3922
789 12.9480 170(13) 169.3173 166.2365
790 12.9580 187(14) 167.9167 166.0812
791 12.9680 189(14) 167.1298 165.9265
792 12.9780 173(13) 166.6542 165.7724
793 12.9880 179(13) 166.4312 165.6187
794 12.9980 173(13) 166.1667 165.4657
795 13.0080 181(13) 165.9440 165.3131
796 13.0180 203(14) 165.7439 165.1611
797 13.0280 182(13) 165.5552 165.0096
798 13.0380 176(13) 165.3736 164.8587
799 13.0480 187(14) 165.1978 164.7083
800 13.0580 194(14) 165.0272 164.5584
801 13.0680 170(13) 164.9160 164.4091
802 13.0780 190(14) 164.7577 164.2603
803 13.0880 184(14) 164.6038 164.1120
804 13.0980 211(15) 164.4541 163.9643
805 13.1080 172(13) 164.3084 163.8171
806 13.1180 192(14) 182.7634 163.6704
807 13.1280 224(15) 183.7124 163.5242
808 13.1380 189(14) 184.7632 163.3786
809 13.1480 183(14) 185.9283 163.2334
810 13.1580 194(14) 187.2197 163.0889
811 13.1680 192(14) 188.6582 162.9448
812 13.1780 182(13) 190.2615 162.8012
813 13.1880 181(13) 192.0524 162.6582
814 13.1980 170(13) 194.0581 162.5156
815 13.2080 193(14) 196.3114 162.3736
816 13.2180 217(15) 198.8512 162.2321
817 13.2280 205(14) 201.7244 162.0911
818 13.2380 197(14) 204.9879 161.9507
819 13.2480 196(14) 208.7122 161.8107
820 13.2580 230(15) 212.9837 161.6713
821 13.2680 248(16) 217.9107 161.5323
822 13.2780 260(16) 223.6081 161.3939
823 13.2880 270(16) 230.3009 161.2560
824 13.2980 302(17) 238.1969 161.1185
825 13.3080 343(19) 247.6144 160.9816
826 13.3180 377(19) 259.0074 160.8452
827 13.3280 432(21) 273.0343 160.7093
828 13.3380 445(21) 290.6522 160.5739
829 13.3480 422(21) 313.2708 160.4390
830 13.3580 385(20) 343.2684 160.3046
831 13.3680 391(20) 385.1521 160.1707
832 13.3780 434(21) 446.8005 160.0372
833 13.3880 527(23) 539.1327 159.9043
834 13.3980 711(27) 675.4594 159.7719
835 13.4080 915(30) 887.3822 159.6400
836 13.4180 1215(35) 1297.3685 159.5085
837 13.4280 1939(44) 2285.9121 159.3776
838 13.4380 3885(62) 4582.8311 159.2471
839 13.4480 8460(92) 8648.5996 159.1172
840 13.4580 14604(121) 13207.7471 158.9877
841 13.4680 16939(130) 14961.4414 158.8587
842 13.4780 12004(110) 11854.8701 158.7302
843 13.4880 5699(75) 6903.4087 158.6022
844 13.4980 2495(50) 3563.1145 158.4746
845 13.5080 1239(35) 1940.6339 158.3475
846 13.5180 886(30) 1173.7284 158.2210
847 13.5280 583(24) 800.9060 158.0949
848 13.5380 453(21) 623.5258 157.9693
849 13.5480 376(19) 527.7397 157.8441
850 13.5580 334(18) 461.1454 157.7195
851 13.5680 301(17) 408.5664 157.5953
852 13.5780 269(16) 366.6310 157.4716
853 13.5880 242(16) 333.5321 157.3483
854 13.5980 233(15) 307.4229 157.2256
855 13.6080 250(16) 286.6535 157.1033
856 13.6180 236(15) 269.9536 156.9815
857 13.6280 248(16) 256.4199 156.8601
858 13.6380 215(15) 245.4982 156.7392
859 13.6480 224(15) 237.0478 156.6188
860 13.6580 205(14) 231.5322 156.4989
861 13.6680 208(14) 230.0536 156.3794
862 13.6780 239(15) 233.5177 156.2604
863 13.6880 249(16) 240.6236 156.1418
864 13.6980 228(15) 246.4509 156.0237
865 13.7080 235(15) 244.5173 155.9061
866 13.7180 223(15) 232.5225 155.7889
867 13.7280 187(14) 216.2652 155.6722
868 13.7380 189(14) 203.1520 155.5559
869 13.7480 196(14) 195.3270 155.4401
870 13.7580 211(15) 191.7159 155.3248
871 13.7680 173(13) 191.6712 155.2099
872 13.7780 189(14) 195.8529 155.0955
873 13.7880 203(14) 204.5963 154.9815
874 13.7980 206(14) 215.4096 154.8680
875 13.8080 240(15) 222.3158 154.7549
876 13.8180 220(15) 219.9329 154.6423
877 13.8280 203(14) 207.3921 154.5301
878 13.8380 204(14) 192.9178 154.4184
879 13.8480 196(14) 165.7641 154.3071
880 13.8580 199(14) 160.7765 154.1962
881 13.8680 194(14) 158.2479 154.0858
882 13.8780 194(14) 156.9977 153.9759
883 13.8880 190(14) 156.3099 153.8664
884 13.8980 159(13) 155.9247 153.7573
885 13.9080 194(14) 155.6849 153.6487
886 13.9180 206(14) 155.5041 153.5405
887 13.9280 171(13) 155.3497 153.4327
888 13.9380 160(13) 155.2148 153.3254
889 13.9480 174(13) 155.0994 153.2185
890 13.9580 161(13) 155.0713 153.1121
891 13.9680 164(13) 155.0040 153.0061
892 13.9780 164(13) 154.9571 152.9005
893 13.9880 181(13) 154.9308 152.7953
894 13.9980 199(14) 154.9263 152.6906
895 14.0080 166(13) 154.9463 152.5863
896 14.0180 166(13) 154.9966 152.4825
897 14.0280 148(12) 155.0886 152.3791
898 14.0380 160(13) 155.2379 152.2761
899 14.0480 163(13) 155.4543 152.1735
900 14.0480 164(13) 155.4543 152.1735
901 14.0680 171(13) 156.0060 151.9696
902 14.0780 191(14) 156.2617 151.8683
903 14.0880 167(13) 156.5101 151.7674
904 14.0980 165(13) 156.8336 151.6670
905 14.1080 180(13) 157.3065 151.5669
906 14.1180 188(14) 158.5902 151.4673
907 14.1280 191(14) 159.5309 151.3681
908 14.1380 178(13) 160.8096 151.2693
909 14.1480 174(13) 162.6049 151.1709
910 14.1580 173(13) 165.2143 151.0730
911 14.1680 202(14) 169.4517 150.9755
912 14.1780 173(13) 177.1733 150.8783
913 14.1880 198(14) 193.4877 150.7816
914 14.1980 202(14) 230.2861 150.6853
915 14.2080 272(16) 307.6001 150.5894
916 14.2180 354(19) 442.2599 150.4939
917 14.2280 538(23) 618.9087 150.3988
918 14.2380 797(28) 768.5945 150.3042
919 14.2480 882(30) 802.1210 150.2099
920 14.2580 754(27) 678.0189 150.1160
921 14.2680 455(21) 487.0147 150.0226
922 14.2780 330(18) 335.9362 149.9295
923 14.2880 231(15) 251.4834 149.8369
924 14.2980 243(16) 211.3059 149.7446
925 14.3080 208(14) 192.5212 149.6528
926 14.3180 208(14) 184.4774 149.5613
927 14.3280 214(15) 183.6166 149.4703
928 14.3380 207(14) 189.8255 149.3796
929 14.3480 213(15) 205.6344 149.2893
930 14.3580 228(15) 233.2040 149.1995
931 14.3680 316(18) 267.9935 149.1100
932 14.3780 375(19) 295.3727 149.0209
933 14.3880 369(19) 298.0999 148.9322
934 14.3980 334(18) 274.0823 148.8439
935 14.4080 321(18) 244.8480 148.7560
936 14.4180 276(17) 235.0686 148.6685
937 14.4280 281(17) 262.7390 148.5814
938 14.4380 413(20) 360.3260 148.4946
939 14.4480 618(25) 497.2823 148.4083
940 14.4580 890(30) 620.0978 148.3223
941 14.4680 835(29) 619.1274 148.2367
942 14.4780 633(25) 485.2677 148.1515
943 14.4880 403(20) 349.9374 148.0667
944 14.4980 301(17) 275.5085 147.9823
945 14.5080 236(15) 243.0289 147.8982
946 14.5180 247(16) 230.6543 147.8145
947 14.5280 233(15) 228.3662 147.7312
948 14.5380 215(15) 231.2261 147.6483
949 14.5480 254(16) 237.0782 147.5658
950 14.5580 239(15) 245.7093 147.4836
951 14.5680 282(17) 257.9588 147.4018
952 14.5780 273(17) 275.5428 147.3204
953 14.5880 347(19) 301.8740 147.2394
954 14.5980 390(20) 346.7742 147.1587
955 14.6080 472(22) 428.4780 147.0784
956 14.6180 566(24) 604.0704 146.9985
957 14.6280 844(29) 986.0353 146.9189
958 14.6380 1528(39) 1718.9421 146.8397
959 14.6480 2777(53) 2832.5376 146.7609
960 14.6580 4747(69) 4030.8425 146.6824
961 14.6680 5637(75) 4698.3721 146.6043
962 14.6780 4641(68) 4327.3975 146.5266
963 14.6880 3027(55) 3153.6926 146.4492
964 14.6980 1690(41) 1989.9313 146.3722
965 14.7080 1150(34) 1286.7285 146.2956
966 14.7180 1113(33) 1012.4370 146.2193
967 14.7280 1271(36) 1066.6965 146.1434
968 14.7380 1871(43) 1559.7111 146.0678
969 14.7480 3132(56) 2896.3345 145.9926
970 14.7580 6199(79) 5450.6880 145.9178
971 14.7680 9779(99) 8587.9316 145.8433
972 14.7780 10553(103) 10141.6582 145.7691
973 14.7880 8070(90) 8321.1816 145.6954
974 14.7980 4555(67) 4953.5073 145.6219
975 14.8080 2577(51) 2602.9365 145.5489
976 14.8180 1618(40) 1440.1931 145.4761
977 14.8280 1118(33) 896.5846 145.4038
978 14.8380 907(30) 642.9994 145.3317
979 14.8480 688(26) 522.4322 145.2601
980 14.8580 566(24) 452.9850 145.1887
981 14.8680 497(22) 402.5848 145.1178
982 14.8780 454(21) 363.1367 145.0471
983 14.8880 373(19) 332.6650 144.9769
984 14.8980 376(19) 309.8280 144.9069
985 14.9080 378(19) 293.4413 144.8373
986 14.9180 356(19) 282.8071 144.7681
987 14.9280 373(19) 278.1076 144.6991
988 14.9380 330(18) 281.3131 144.6306
989 14.9480 395(20) 299.0690 144.5623
990 14.9580 420(20) 371.6006 144.4944
991 14.9680 511(23) 496.1644 144.4269
992 14.9780 630(25) 749.0580 144.3596
993 14.9880 832(29) 1152.2417 144.2928
994 14.9980 1189(34) 1610.9402 144.2262
995 15.0080 1498(39) 1897.7045 144.1600
996 15.0180 1401(37) 1797.7568 144.0941
997 15.0280 1066(33) 1363.4379 144.0286
998 15.0380 622(25) 903.8346 143.9634
999 15.0480 446(21) 610.9675 143.8985
1000 15.0580 364(19) 469.0361 143.8339
1001 15.0680 359(19) 399.7572 143.7697
1002 15.0780 287(17) 352.3085 143.7058
1003 15.0880 272(16) 314.2298 143.6422
1004 15.0980 225(15) 289.2754 143.5790
1005 15.1080 232(15) 277.0584 143.5161
1006 15.1180 265(16) 269.0619 143.4535
1007 15.1280 241(16) 270.3573 143.3912
1008 15.1380 259(16) 275.2498 143.3293
1009 15.1480 252(16) 270.5403 143.2676
1010 15.1580 286(17) 282.8625 143.2063
1011 15.1680 305(17) 299.0760 143.1453
1012 15.1780 310(18) 320.1114 143.0847
1013 15.1880 367(19) 347.4776 143.0243
1014 15.1980 425(21) 383.6467 142.9643
1015 15.2080 482(22) 433.0245 142.9046
1016 15.2180 617(25) 504.1494 142.8452
1017 15.2280 802(28) 615.3013 142.7861
1018 15.2380 1211(35) 812.2037 142.7274
1019 15.2480 1693(41) 1229.8600 142.6689
1020 15.2580 3008(55) 2234.8779 142.6108
1021 15.2680 5464(74) 4535.7754 142.5529
1022 15.2780 9881(99) 8593.5166 142.4954
1023 15.2880 15041(123) 13105.1865 142.4382
1024 15.2980 16869(130) 14608.6367 142.3813
1025 15.3080 12303(111) 11134.7842 142.3247
1026 15.3180 6417(80) 6300.8979 142.2684
1027 15.3280 3183(56) 3258.8101 142.2125
1028 15.3380 1846(43) 1795.0913 142.1568
1029 15.3480 1153(34) 1118.3767 142.1014
1030 15.3580 850(29) 812.0962 142.0464
1031 15.3680 620(25) 666.0557 141.9916
1032 15.3780 502(22) 573.7444 141.9371
1033 15.3880 374(19) 497.4371 141.8830
1034 15.3980 363(19) 431.6754 141.8291
1035 15.4080 299(17) 379.1756 141.7756
1036 15.4180 267(16) 339.5953 141.7223
1037 15.4280 246(16) 309.8730 141.6694
1038 15.4380 238(15) 287.0169 141.6167
1039 15.4480 225(15) 269.0241 141.5644
1040 15.4580 234(15) 252.9879 141.5123
1041 15.4680 183(14) 241.3511 141.4605
1042 15.4780 191(14) 231.8139 141.4090
1043 15.4880 205(14) 223.9659 141.3578
1044 15.4980 210(14) 217.5237 141.3070
1045 15.5080 210(14) 212.2178 141.2563
1046 15.5180 210(14) 208.0722 141.2060
1047 15.5280 241(16) 204.9430 141.1560
1048 15.5380 219(15) 202.8360 141.1063
1049 15.5480 193(14) 201.8552 141.0568
1050 15.5580 248(16) 202.2582 141.0077
1051 15.5680 238(15) 204.5744 140.9588
1052 15.5780 268(16) 209.9203 140.9102
1053 15.5880 304(17) 221.0213 140.8619
1054 15.5980 387(20) 245.2664 140.8139
1055 15.6080 453(21) 301.3934 140.7662
1056 15.6180 557(24) 426.1718 140.7187
1057 15.6280 703(27) 662.8051 140.6715
1058 15.6380 945(31) 1009.1826 140.6246
1059 15.6480 1354(37) 1354.8618 140.5780
1060 15.6580 1542(39) 1480.3599 140.5317
1061 15.6680 1229(35) 1296.7051 140.4857
1062 15.6780 842(29) 911.0267 140.4399
1063 15.6880 532(23) 571.2335 140.3944
1064 15.6980 414(20) 367.7701 140.3492
1065 15.7080 269(16) 265.0855 140.3042
1066 15.7180 246(16) 214.3279 140.2595
1067 15.7280 225(15) 188.9923 140.2151
1068 15.7380 170(13) 176.5629 140.1710
1069 15.7480 180(13) 169.9998 140.1271
1070 15.7580 147(12) 165.6407 140.0836
1071 15.7680 148(12) 162.1059 140.0402
1072 15.7780 165(13) 159.0815 139.9972
1073 15.7880 158(13) 156.4762 139.9544
1074 15.7980 162(13) 154.2834 139.9119
1075 15.8080 145(12) 152.4569 139.8697
1076 15.8180 168(13) 150.9099 139.8277
1077 15.8280 147(12) 149.6507 139.7860
1078 15.8380 122(11) 148.6048 139.7445
1079 15.8480 144(12) 147.7435 139.7033
1080 15.8580 162(13) 147.0461 139.6624
1081 15.8680 128(11) 146.4853 139.6218
1082 15.8780 167(13) 146.0122 139.5814
1083 15.8880 190(14) 145.5651 139.5412
1084 15.8980 138(12) 145.1118 139.5013
1085 15.9080 146(12) 144.6881 139.4617
1086 15.9180 135(12) 144.3467 139.4224
1087 15.9280 163(13) 144.1029 139.3833
1088 15.9380 153(12) 143.9541 139.3444
1089 15.9480 154(12) 143.9085 139.3058
1090 15.9580 172(13) 143.9987 139.2675
1091 15.9680 147(12) 144.3066 139.2294
1092 15.9780 160(13) 145.0468 139.1916
1093 15.9880 168(13) 146.8033 139.1540
1094 15.9980 177(13) 150.9569 139.1167
1095 16.0080 172(13) 159.9036 139.0796
1096 16.0180 160(13) 175.3961 139.0428
1097 16.0280 194(14) 195.3603 139.0062
1098 16.0380 199(14) 211.2808 138.9699
1099 16.0480 220(15) 212.1871 138.9338
1100 16.0580 187(14) 195.8719 138.8980
1101 16.0680 169(13) 174.4488 138.8624
1102 16.0780 133(12) 158.8838 138.8271
1103 16.0880 122(11) 150.3662 138.7920
1104 16.0980 138(12) 144.7812 138.7572
1105 16.1080 141(12) 142.8049 138.7226
1106 16.1180 143(12) 142.0079 138.6882
1107 16.1280 159(13) 142.0090 138.6541
1108 16.1380 174(13) 142.8809 138.6202
1109 16.1480 148(12) 145.0946 138.5866
1110 16.1580 148(12) 149.0201 138.5532
1111 16.1680 150(12) 153.9377 138.5200
1112 16.1780 136(12) 157.5290 138.4871
1113 16.1880 149(12) 157.0929 138.4544
1114 16.1980 149(12) 152.5217 138.4220
1115 16.2080 142(12) 147.1240 138.3898
1116 16.2180 154(12) 143.3736 138.3578
1117 16.2280 156(12) 141.3417 138.3261
1118 16.2380 125(11) 140.3176 138.2946
1119 16.2480 153(12) 139.7976 138.2633
1120 16.2580 125(11) 139.5384 138.2323
1121 16.2680 124(11) 139.4110 138.2014
1122 16.2780 141(12) 139.3463 138.1709
1123 16.2880 119(11) 139.3469 138.1405
1124 16.2980 135(12) 139.3532 138.1104
1125 16.3080 131(11) 139.4023 138.0805
1126 16.3180 159(13) 139.5293 138.0509
1127 16.3280 131(11) 139.7357 138.0214
1128 16.3380 132(11) 140.1138 137.9922
1129 16.3480 135(12) 140.8608 137.9632
1130 16.3580 167(13) 142.5011 137.9345
1131 16.3680 157(13) 146.1994 137.9060
1132 16.3780 141(12) 153.6994 137.8776
1133 16.3880 140(12) 165.8857 137.8496
1134 16.3980 187(14) 180.1152 137.8217
1135 16.4080 199(14) 189.3409 137.7941
1136 16.4180 196(14) 186.4086 137.7666
1137 16.4280 183(14) 172.7596 137.7394
1138 16.4380 173(13) 158.2896 137.7124
1139 16.4480 146(12) 148.7925 137.6857
1140 16.4580 139(12) 143.7918 137.6591
1141 16.4680 154(12) 141.3023 137.6328
1142 16.4780 118(11) 139.9800 137.6067
1143 16.4880 143(12) 139.3697 137.5808
1144 16.4980 135(12) 139.0509 137.5551
1145 16.5080 140(12) 138.8460 137.5296
1146 16.5180 133(12) 138.6858 137.5044
1147 16.5280 158(13) 138.5525 137.4793
1148 16.5380 120(11) 138.4437 137.4545
1149 16.5480 126(11) 138.3592 137.4299
1150 16.5580 153(12) 138.2986 137.4055
1151 16.5680 143(12) 138.2619 137.3813
1152 16.5780 145(12) 139.6226 137.3573
1153 16.5880 120(11) 139.7108 137.3335
1154 16.5980 119(11) 139.8454 137.3099
1155 16.6080 138(12) 140.0490 137.2865
1156 16.6180 140(12) 140.3545 137.2634
1157 16.6280 122(11) 140.9417 137.2404
1158 16.6380 121(11) 142.1380 137.2177
1159 16.6480 139(12) 144.6314 137.1951
1160 16.6580 134(12) 149.2461 137.1728
1161 16.6680 156(12) 156.0243 137.1506
1162 16.6780 163(13) 163.1686 137.1287
1163 16.6880 164(13) 167.4684 137.1069
1164 16.6980 166(13) 167.3425 137.0854
1165 16.7080 160(13) 164.5236 137.0641
1166 16.7180 167(13) 161.9335 137.0429
1167 16.7280 152(12) 158.6895 137.0220
1168 16.7380 167(13) 153.8796 137.0013
1169 16.7480 148(12) 149.1706 136.9807
1170 16.7580 161(13) 146.1422 136.9604
1171 16.7680 159(13) 144.7161 136.9402
1172 16.7780 149(12) 144.2474 136.9202
1173 16.7880 179(13) 150.7717 136.9005
1174 16.7980 181(13) 151.5265 136.8809
1175 16.8080 174(13) 152.5297 136.8615
1176 16.8180 144(12) 153.7517 136.8423
1177 16.8280 154(12) 155.2043 136.8233
1178 16.8380 170(13) 156.8690 136.8046
1179 16.8480 154(12) 158.9305 136.7859
1180 16.8580 152(12) 161.4211 136.7675
1181 16.8680 162(13) 164.4845 136.7493
1182 16.8780 155(12) 168.3517 136.7312
1183 16.8880 166(13) 173.4075 136.7134
1184 16.8980 169(13) 180.3366 136.6957
1185 16.9080 186(14) 190.5045 136.6782
1186 16.9180 183(14) 207.1680 136.6609
1187 16.9280 231(15) 238.9845 136.6438
1188 16.9380 294(17) 306.6756 136.6269
1189 16.9480 411(20) 446.5197 136.6101
1190 16.9580 654(26) 690.1271 136.5936
1191 16.9680 918(30) 1009.1516 136.5772
1192 16.9780 1394(37) 1274.6548 136.5610
1193 16.9880 1554(39) 1314.3866 136.5450
1194 16.9980 1258(35) 1096.8998 136.5291
1195 17.0080 798(28) 821.2598 136.5135
1196 17.0180 507(23) 640.1439 136.4980
1197 17.0280 415(20) 527.6373 136.4827
1198 17.0380 347(19) 434.7677 136.4676
1199 17.0480 333(18) 385.9796 136.4526
1200 17.0580 418(20) 401.4187 136.4379
1201 17.0680 540(23) 503.5269 136.4232
1202 17.0780 839(29) 782.4846 136.4088
1203 17.0880 1507(39) 1414.6658 136.3946
1204 17.0980 2472(50) 2475.5347 136.3805
1205 17.1080 3741(61) 3540.2212 136.3666
1206 17.1180 3690(61) 3660.8496 136.3529
1207 17.1280 2547(50) 2590.2627 136.3393
1208 17.1380 1394(37) 1464.8335 136.3260
1209 17.1480 868(29) 825.0195 136.3127
1210 17.1580 571(24) 519.5775 136.2997
1211 17.1680 407(20) 378.0237 136.2868
1212 17.1780 315(18) 311.3134 136.2741
1213 17.1880 257(16) 274.0086 136.2616
1214 17.1980 232(15) 247.7733 136.2492
1215 17.2080 207(14) 227.5211 136.2370
1216 17.2180 189(14) 211.7905 136.2250
1217 17.2280 178(13) 199.6082 136.2131
1218 17.2380 176(13) 190.1219 136.2014
1219 17.2480 170(13) 182.6534 136.1898
1220 17.2580 138(12) 176.7277 136.1785
1221 17.2680 149(12) 172.0585 136.1673
1222 17.2780 142(12) 168.5024 136.1562
1223 17.2880 156(12) 165.9268 136.1453
1224 17.2980 128(11) 164.0043 136.1346
1225 17.3080 140(12) 162.1449 136.1240
1226 17.3180 143(12) 159.7902 136.1136
1227 17.3280 125(11) 157.0306 136.1033
1228 17.3380 140(12) 154.5030 136.0932
1229 17.3480 125(11) 152.5105 136.0833
1230 17.3580 129(11) 150.9674 136.0735
1231 17.3680 145(12) 149.7210 136.0639
1232 17.3780 147(12) 148.4124 136.0544
1233 17.3880 129(11) 147.6931 136.0451
1234 17.3980 150(12) 146.9154 136.0359
1235 17.4080 137(12) 144.8733 136.0269
1236 17.4180 152(12) 144.3158 136.0181
1237 17.4280 134(12) 143.9355 136.0094
1238 17.4380 140(12) 143.5199 136.0009
1239 17.4480 127(11) 143.1997 135.9925
1240 17.4480 116(11) 143.1997 135.9925
1241 17.4680 146(12) 137.1484 135.9761
1242 17.4780 117(11) 137.5468 135.9682
1243 17.4880 122(11) 137.8286 135.9604
1244 17.4980 116(11) 137.7870 135.9527
1245 17.5080 109(10) 137.4467 135.9453
1246 17.5180 116(11) 137.0822 135.9379
1247 17.5280 137(12) 136.8554 135.9307
1248 17.5380 113(11) 136.7545 135.9236
1249 17.5480 100(10) 136.7277 135.9167
1250 17.5580 117(11) 136.7309 135.9100
1251 17.5680 144(12) 136.7705 135.9033
1252 17.5780 116(11) 136.8263 135.8969
1253 17.5880 135(12) 136.8952 135.8905
1254 17.5980 132(11) 136.9773 135.8843
1255 17.6080 122(11) 137.0747 135.8783
1256 17.6180 124(11) 137.1905 135.8724
1257 17.6280 152(12) 137.3513 135.8666
1258 17.6380 149(12) 137.5178 135.8610
1259 17.6480 167(13) 137.7189 135.8555
1260 17.6580 153(12) 137.9645 135.8501
1261 17.6680 146(12) 138.2697 135.8449
1262 17.6780 147(12) 138.6581 135.8399
1263 17.6880 143(12) 139.1682 135.8349
1264 17.6980 142(12) 139.8812 135.8301
1265 17.7080 143(12) 140.8920 135.8255
1266 17.7180 143(12) 142.4812 135.8209
1267 17.7280 166(13) 145.3274 135.8165
1268 17.7380 145(12) 151.1568 135.8123
1269 17.7480 165(13) 163.5641 135.8082
1270 17.7580 207(14) 187.2437 135.8042
1271 17.7680 211(15) 223.2448 135.8003
1272 17.7780 277(17) 262.3957 135.7966
1273 17.7880 301(17) 286.4772 135.7930
1274 17.7980 296(17) 283.5516 135.7895
1275 17.8080 236(15) 267.4865 135.7862
1276 17.8180 265(16) 256.3167 135.7830
1277 17.8280 251(16) 244.1068 135.7799
1278 17.8380 221(15) 219.2687 135.7769
1279 17.8480 183(14) 188.9610 135.7741
1280 17.8580 157(13) 166.3601 135.7714
1281 17.8680 146(12) 153.5630 135.7689
1282 17.8780 138(12) 146.9904 135.7664
1283 17.8880 130(11) 143.8753 135.7641
1284 17.8980 116(11) 142.0942 135.7619
1285 17.9080 138(12) 141.0956 135.7599
1286 17.9180 144(12) 140.4515 135.7579
1287 17.9280 118(11) 139.9893 135.7561
1288 17.9380 115(11) 139.6613 135.7544
1289 17.9480 144(12) 139.4789 135.7528
1290 17.9580 124(11) 139.5084 135.7514
1291 17.9680 114(11) 139.9396 135.7501
1292 17.9780 144(12) 141.1877 135.7489
1293 17.9880 130(11) 143.8174 135.7478
1294 17.9980 136(12) 147.9557 135.7468
1295 18.0080 132(11) 152.4066 135.7460
1296 18.0180 142(12) 154.6233 135.7452
1297 18.0280 136(12) 152.6322 135.7446
1298 18.0380 135(12) 148.1077 135.7441
1299 18.0480 141(12) 144.5662 135.7437
1300 18.0580 126(11) 143.4546 135.7435
1301 18.0680 116(11) 144.5879 135.7433
1302 18.0780 142(12) 147.0354 135.7433
1303 18.0880 169(13) 149.1279 135.7434
1304 18.0980 148(12) 149.0409 135.7436
1305 18.1080 137(12) 146.7313 135.7439
1306 18.1180 147(12) 144.4993 135.7443
1307 18.1280 128(11) 144.6254 135.7448
1308 18.1380 141(12) 154.2507 135.7455
1309 18.1480 159(13) 158.8649 135.7462
1310 18.1580 140(12) 163.7209 135.7471
1311 18.1680 165(13) 165.9958 135.7481
1312 18.1780 168(13) 164.1676 135.7492
1313 18.1880 156(12) 160.6518 135.7504
1314 18.1980 170(13) 158.6564 135.7517
1315 18.2080 151(12) 158.9532 135.7531
1316 18.2180 157(13) 162.0952 135.7546
1317 18.2280 176(13) 169.4148 135.7563
1318 18.2380 171(13) 185.1908 135.7580
1319 18.2480 215(15) 216.1357 135.7598
1320 18.2580 224(15) 266.0370 135.7618
1321 18.2680 287(17) 324.2098 135.7638
1322 18.2780 354(19) 361.3958 135.7660
1323 18.2880 377(19) 348.4612 135.7682
1324 18.2980 264(16) 295.2450 135.7706
1325 18.3080 204(14) 243.6025 135.7731
1326 18.3180 173(13) 212.9354 135.7757
1327 18.3280 192(14) 199.6708 135.7783
1328 18.3380 168(13) 196.6998 135.7811
1329 18.3480 161(13) 199.8584 135.7840
1330 18.3580 192(14) 207.2419 135.7869
1331 18.3680 198(14) 218.3119 135.7900
1332 18.3780 218(15) 233.7577 135.7932
1333 18.3880 269(16) 255.7335 135.7964
1334 18.3980 317(18) 288.9277 135.7998
1335 18.4080 411(20) 343.9153 135.8033
1336 18.4180 534(23) 448.4137 135.8068
1337 18.4280 789(28) 679.1592 135.8105
1338 18.4380 1301(36) 1203.3329 135.8143
1339 18.4480 2295(48) 2193.9158 135.8181
1340 18.4580 3534(59) 3457.3923 135.8221
1341 18.4680 3923(63) 4110.1558 135.8261
1342 18.4780 2979(55) 3333.0771 135.8302
1343 18.4880 1855(43) 2049.9104 135.8345
1344 18.4980 1226(35) 1263.4985 135.8388
1345 18.5080 975(31) 921.2556 135.8432
1346 18.5180 839(29) 760.1627 135.8477
1347 18.5280 670(26) 622.0272 135.8523
1348 18.5380 485(22) 481.1630 135.8570
1349 18.5480 402(20) 370.6946 135.8618
1350 18.5580 319(18) 299.4965 135.8666
1351 18.5680 257(16) 256.4664 135.8716
1352 18.5780 233(15) 230.2213 135.8766
1353 18.5880 209(14) 213.7951 135.8818
1354 18.5980 200(14) 203.3793 135.8870
1355 18.6080 215(15) 197.4027 135.8923
1356 18.6180 195(14) 196.6554 135.8977
1357 18.6280 222(15) 204.0501 135.9032
1358 18.6380 230(15) 222.2321 135.9088
1359 18.6480 272(16) 247.9662 135.9144
1360 18.6580 281(17) 268.0069 135.9202
1361 18.6680 306(17) 264.7576 135.9260
1362 18.6780 268(16) 236.1635 135.9319
1363 18.6880 210(14) 203.0918 135.9379
1364 18.6980 166(13) 179.8288 135.9440
1365 18.7080 181(13) 166.7868 135.9501
1366 18.7180 144(12) 159.6654 135.9564
1367 18.7280 143(12) 155.6528 135.9627
1368 18.7380 131(11) 153.2259 135.9691
1369 18.7480 146(12) 151.5451 135.9756
1370 18.7580 141(12) 150.2073 135.9822
1371 18.7680 146(12) 149.6612 135.9888
1372 18.7780 139(12) 148.7273 135.9955
1373 18.7880 136(12) 147.9818 136.0023
1374 18.7980 127(11) 147.4852 136.0092
1375 18.8080 143(12) 139.9284 136.0162
1376 18.8180 126(11) 140.5179 136.0232
1377 18.8280 117(11) 141.1697 136.0303
1378 18.8380 133(12) 141.4202 136.0375
1379 18.8480 138(12) 140.9410 136.0448
1380 18.8580 148(12) 140.0722 136.0521
1381 18.8680 133(12) 140.3959 136.0596
1382 18.8780 148(12) 140.0676 136.0670
1383 18.8880 154(12) 139.9703 136.0746
1384 18.8980 130(11) 140.0128 136.0822
1385 18.9080 150(12) 140.1452 136.0900
1386 18.9180 134(12) 140.3432 136.0977
1387 18.9280 156(12) 140.1833 136.1056
1388 18.9380 120(11) 140.5186 136.1135
1389 18.9480 148(12) 140.9033 136.1215
1390 18.9580 121(11) 141.3941 136.1296
1391 18.9680 121(11) 141.9927 136.1378
1392 18.9780 130(11) 142.7314 136.1460
1393 18.9880 150(12) 143.6565 136.1543
1394 18.9980 138(12) 144.8408 136.1626
1395 19.0080 156(12) 146.4087 136.1710
1396 19.0180 129(11) 148.5942 136.1795
1397 19.0280 143(12) 151.8798 136.1881
1398 19.0380 164(13) 157.3915 136.1967
1399 19.0480 180(13) 168.1609 136.2054
1400 19.0580 205(14) 192.1047 136.2141
1401 19.0680 261(16) 243.5155 136.2230
1402 19.0780 360(19) 329.3025 136.2318
1403 19.0880 446(21) 417.5985 136.2408
1404 19.0980 456(21) 427.9950 136.2498
1405 19.1080 370(19) 339.3649 136.2589
1406 19.1180 299(17) 249.7785 136.2680
1407 19.1280 207(14) 200.3307 136.2773
1408 19.1380 210(14) 177.7807 136.2865
1409 19.1480 165(13) 168.5957 136.2959
1410 19.1580 181(13) 165.6648 136.3053
1411 19.1680 169(13) 165.8381 136.3147
1412 19.1780 176(13) 168.5215 136.3242
1413 19.1880 199(14) 174.8282 136.3338
1414 19.1980 222(15) 188.3256 136.3434
1415 19.2080 216(15) 218.3111 136.3531
1416 19.2180 271(16) 283.7434 136.3629
1417 19.2280 359(19) 407.7847 136.3727
1418 19.2380 467(22) 589.0503 136.3826
1419 19.2480 715(27) 766.3390 136.3925
1420 19.2580 777(28) 826.0519 136.4025
1421 19.2680 588(24) 702.7727 136.4126
1422 19.2780 379(19) 497.8724 136.4227
1423 19.2880 283(17) 338.3315 136.4328
1424 19.2980 217(15) 247.0589 136.4430
1425 19.3080 199(14) 200.5737 136.4533
1426 19.3180 170(13) 177.7931 136.4636
1427 19.3280 148(12) 168.0446 136.4740
1428 19.3380 147(12) 162.4909 136.4845
1429 19.3480 122(11) 159.0298 136.4949
1430 19.3580 140(12) 156.6308 136.5055
1431 19.3680 130(11) 154.6463 136.5161
1432 19.3780 154(12) 153.6352 136.5267
1433 19.3880 147(12) 152.7725 136.5374
1434 19.3980 171(13) 152.5638 136.5482
1435 19.4080 144(12) 153.3002 136.5590
1436 19.4180 159(13) 155.8339 136.5698
1437 19.4280 178(13) 162.2301 136.5807
1438 19.4380 182(13) 175.3799 136.5917
1439 19.4480 178(13) 198.8506 136.6027
1440 19.4580 216(15) 227.8251 136.6137
1441 19.4680 227(15) 248.2101 136.6248
1442 19.4780 246(16) 243.4091 136.6360
1443 19.4880 214(15) 215.8445 136.6472
1444 19.4980 171(13) 187.4986 136.6584
1445 19.5080 174(13) 169.6240 136.6697
1446 19.5180 157(13) 160.7589 136.6811
1447 19.5280 121(11) 157.2404 136.6924
1448 19.5380 139(12) 156.7726 136.7039
1449 19.5480 146(12) 158.1886 136.7153
1450 19.5580 148(12) 160.9357 136.7269
1451 19.5680 149(12) 165.5901 136.7384
1452 19.5780 177(13) 174.0849 136.7500
1453 19.5880 171(13) 189.4967 136.7617
1454 19.5980 203(14) 214.6110 136.7734
1455 19.6080 222(15) 251.6573 136.7851
1456 19.6180 314(18) 308.1913 136.7969
1457 19.6280 398(20) 405.5892 136.8087
1458 19.6380 496(22) 560.1715 136.8206
1459 19.6480 585(24) 710.8253 136.8325
1460 19.6580 547(23) 701.4590 136.8445
1461 19.6680 424(21) 515.2502 136.8564
1462 19.6780 315(18) 348.1003 136.8685
1463 19.6880 277(17) 260.9697 136.8806
1464 19.6980 237(15) 227.4377 136.8927
1465 19.7080 251(16) 227.1240 136.9048
1466 19.7180 249(16) 252.6915 136.9170
1467 19.7280 290(17) 303.6009 136.9292
1468 19.7380 382(20) 368.3713 136.9415
1469 19.7480 419(20) 433.6206 136.9538
1470 19.7580 483(22) 480.4972 136.9661
1471 19.7680 508(23) 487.3190 136.9785
1472 19.7780 415(20) 428.6140 136.9909
1473 19.7880 335(18) 331.9670 137.0034
1474 19.7980 269(16) 252.8638 137.0158
1475 19.8080 197(14) 206.3083 137.0284
1476 19.8180 191(14) 182.2874 137.0409
1477 19.8280 172(13) 170.4779 137.0535
1478 19.8380 174(13) 164.8529 137.0661
1479 19.8480 177(13) 162.1951 137.0788
1480 19.8580 147(12) 161.0669 137.0915
1481 19.8680 137(12) 160.7923 137.1042
1482 19.8780 141(12) 161.5407 137.1170
1483 19.8880 177(13) 164.4317 137.1297
1484 19.8980 148(12) 170.6299 137.1426
1485 19.9080 149(12) 181.1269 137.1554
1486 19.9180 177(13) 194.6133 137.1683
1487 19.9280 187(14) 206.1017 137.1812
1488 19.9380 199(14) 209.3918 137.1942
1489 19.9480 187(14) 203.7279 137.2071
1490 19.9580 185(14) 197.6280 137.2201
1491 19.9680 197(14) 199.4226 137.2332
1492 19.9780 225(15) 213.6285 137.2462
1493 19.9880 251(16) 245.7632 137.2593
1494 19.9980 291(17) 302.4580 137.2724
1495 20.0080 362(19) 397.1284 137.2856
1496 20.0180 490(22) 552.4663 137.2988
1497 20.0280 686(26) 802.1379 137.3120
1498 20.0380 1001(32) 1124.2971 137.3252
1499 20.0480 1060(33) 1316.8145 137.3384
1500 20.0580 859(29) 1109.1758 137.3517
1501 20.0680 611(25) 712.1150 137.3650
1502 20.0780 411(20) 442.8840 137.3783
1503 20.0880 345(19) 308.8622 137.3917
1504 20.0980 345(19) 247.8651 137.4051
1505 20.1080 317(18) 221.9505 137.4185
1506 20.1180 225(15) 216.4547 137.4319
1507 20.1280 207(14) 218.0838 137.4454
1508 20.1380 196(14) 225.5726 137.4588
1509 20.1480 191(14) 231.8127 137.4724
1510 20.1580 204(14) 230.3940 137.4859
1511 20.1680 199(14) 224.2421 137.4994
1512 20.1780 192(14) 221.3628 137.5130
1513 20.1880 210(14) 220.8143 137.5266
1514 20.1980 218(15) 215.5238 137.5402
1515 20.2080 218(15) 209.0514 137.5538
1516 20.2180 185(14) 211.2332 137.5675
1517 20.2280 216(15) 221.3535 137.5811
1518 20.2380 182(13) 228.1985 137.5948
1519 20.2480 185(14) 219.8413 137.6085
1520 20.2580 185(14) 199.7853 137.6223
1521 20.2680 174(13) 182.1799 137.6360
1522 20.2780 168(13) 171.9126 137.6498
1523 20.2880 152(12) 167.2315 137.6636
1524 20.2980 176(13) 165.8712 137.6774
1525 20.3080 185(14) 166.5092 137.6912
1526 20.3180 149(12) 168.4984 137.7050
1527 20.3280 170(13) 171.6330 137.7189
1528 20.3280 162(13) 171.6330 137.7189
1529 20.3480 139(12) 182.2990 137.7466
1530 20.3580 212(15) 191.3342 137.7605
1531 20.3680 179(13) 205.0965 137.7744
1532 20.3780 188(14) 227.8549 137.7884
1533 20.3880 254(16) 268.0406 137.8023
1534 20.3980 366(19) 358.9287 137.8163
1535 20.4080 563(24) 557.6922 137.8302
1536 20.4180 920(30) 923.6310 137.8442
1537 20.4280 1612(40) 1384.5730 137.8582
1538 20.4380 1988(45) 1608.8618 137.8723
1539 20.4480 1488(39) 1289.7273 137.8863
1540 20.4580 876(30) 799.0341 137.9003
1541 20.4680 504(22) 488.1264 137.9144
1542 20.4780 291(17) 335.2615 137.9285
1543 20.4880 252(16) 264.4598 137.9425
1544 20.4980 238(15) 230.7624 137.9566
1545 20.5080 212(15) 211.8347 137.9707
1546 20.5180 224(15) 198.9825 137.9848
1547 20.5280 177(13) 189.7577 137.9989
1548 20.5380 187(14) 183.4696 138.0131
1549 20.5480 173(13) 179.8415 138.0272
1550 20.5580 190(14) 178.9279 138.0414
1551 20.5680 187(14) 181.9791 138.0555
1552 20.5780 199(14) 192.3514 138.0697
1553 20.5780 234(15) 192.3514 138.0697
1554 20.5980 245(16) 269.9182 138.0981
1555 20.6080 359(19) 353.6702 138.1122
1556 20.6180 434(21) 449.3025 138.1264
1557 20.6280 524(23) 505.4572 138.1406
1558 20.6380 476(22) 473.8427 138.1549
1559 20.6480 315(18) 376.0968 138.1691
1560 20.6580 250(16) 280.8348 138.1833
1561 20.6680 233(15) 219.5760 138.1975
1562 20.6780 194(14) 186.6706 138.2118
1563 20.6880 179(13) 170.1600 138.2260
1564 20.6980 188(14) 162.0977 138.2403
1565 20.7080 163(13) 158.1158 138.2545
1566 20.7180 170(13) 156.0876 138.2688
1567 20.7280 144(12) 155.1532 138.2830
1568 20.7380 153(12) 154.7684 138.2973
1569 20.7480 165(13) 154.1889 138.3116
1570 20.7580 142(12) 152.7735 138.3258
1571 20.7680 178(13) 151.0072 138.3401
1572 20.7780 161(13) 147.0690 138.3544
1573 20.7880 134(12) 151.2217 138.3687
1574 20.7980 186(14) 154.9336 138.3829
1575 20.8080 173(13) 161.0089 138.3972
1576 20.8180 180(13) 166.8216 138.4115
1577 20.8280 146(12) 168.5004 138.4258
1578 20.8380 188(14) 163.9665 138.4401
1579 20.8480 169(13) 157.1340 138.4544
1580 20.8580 156(12) 152.1344 138.4687
1581 20.8680 144(12) 149.4690 138.4830
1582 20.8780 164(13) 148.3247 138.4973
1583 20.8880 145(12) 148.0448 138.5115
1584 20.8980 136(12) 148.2195 138.5258
1585 20.9080 136(12) 148.6670 138.5401
1586 20.9180 137(12) 149.3189 138.5544
1587 20.9280 166(13) 150.1924 138.5687
1588 20.9380 129(11) 151.3489 138.5830
1589 20.9480 163(13) 152.8383 138.5972
1590 20.9580 162(13) 155.3864 138.6115
1591 20.9680 149(12) 157.3949 138.6258
1592 20.9780 171(13) 159.5029 138.6401
1593 20.9880 176(13) 161.9705 138.6543
1594 20.9980 158(13) 165.2387 138.6686
1595 21.0080 180(13) 169.6569 138.6829
1596 21.0180 178(13) 175.6451 138.6971
1597 21.0280 209(14) 183.6752 138.7114
1598 21.0380 196(14) 195.6578 138.7256
1599 21.0480 249(16) 215.1770 138.7399
1600 21.0580 266(16) 249.9552 138.7541
1601 21.0680 347(19) 320.8346 138.7683
1602 21.0780 478(22) 474.1950 138.7825
1603 21.0880 787(28) 768.1789 138.7968
1604 21.0980 1168(34) 1177.5414 138.8110
1605 21.1080 1240(35) 1460.5988 138.8252
1606 21.1180 1066(33) 1276.4332 138.8394
1607 21.1280 741(27) 831.2927 138.8536
1608 21.1380 499(22) 517.6306 138.8678
1609 21.1480 385(20) 365.4084 138.8819
1610 21.1580 343(19) 308.3426 138.8961
1611 21.1680 331(18) 300.1025 138.9103
1612 21.1780 327(18) 307.4677 138.9244
1613 21.1880 278(17) 302.4511 138.9386
1614 21.1980 262(16) 272.2426 138.9527
1615 21.2080 239(15) 233.7684 138.9668
1616 21.2180 225(15) 205.5010 138.9810
1617 21.2280 208(14) 189.4980 138.9951
1618 21.2380 187(14) 182.5846 139.0092
1619 21.2480 188(14) 180.9756 139.0233
1620 21.2580 173(13) 182.8613 139.0373
1621 21.2680 196(14) 186.6666 139.0514
1622 21.2780 200(14) 193.0493 139.0655
1623 21.2880 204(14) 208.6010 139.0795
1624 21.2980 244(16) 246.6092 139.0935
1625 21.3080 305(17) 321.9196 139.1076
1626 21.3180 447(21) 434.4621 139.1216
1627 21.3280 559(24) 547.3842 139.1356
1628 21.3380 640(25) 584.7243 139.1496
1629 21.3480 586(24) 503.0566 139.1635
1630 21.3580 430(21) 372.4143 139.1775
1631 21.3680 305(17) 273.0068 139.1914
1632 21.3780 256(16) 216.2010 139.2054
1633 21.3880 214(15) 187.0856 139.2193
1634 21.3980 217(15) 172.7828 139.2332
1635 21.4080 171(13) 165.7367 139.2471
1636 21.4180 170(13) 161.8304 139.2609
1637 21.4280 178(13) 159.1801 139.2748
1638 21.4380 170(13) 157.1373 139.2887
1639 21.4480 170(13) 159.5155 139.3025
1640 21.4580 159(13) 158.8851 139.3163
1641 21.4680 177(13) 158.6751 139.3301
1642 21.4780 162(13) 158.7488 139.3439
1643 21.4880 189(14) 159.1388 139.3577
1644 21.4980 156(12) 159.8486 139.3714
1645 21.5080 194(14) 160.8982 139.3851
1646 21.5180 194(14) 171.9861 139.3989
1647 21.5280 170(13) 174.5420 139.4126
1648 21.5380 184(14) 177.9506 139.4263
1649 21.5480 193(14) 182.4252 139.4399
1650 21.5580 210(14) 188.9300 139.4536
1651 21.5680 201(14) 199.6653 139.4672
1652 21.5780 233(15) 219.4479 139.4808
1653 21.5880 226(15) 255.3475 139.4944
1654 21.5980 296(17) 311.2626 139.5080
1655 21.6080 301(17) 375.2986 139.5215
1656 21.6180 347(19) 415.6047 139.5351
1657 21.6280 359(19) 401.1324 139.5486
1658 21.6380 332(18) 351.8228 139.5621
1659 21.6480 300(17) 315.4187 139.5756
1660 21.6580 257(16) 311.2206 139.5890
1661 21.6680 322(18) 344.6722 139.6025
1662 21.6780 409(20) 426.4878 139.6159
1663 21.6880 527(23) 562.1153 139.6293
1664 21.6980 729(27) 732.8378 139.6427
1665 21.7080 892(30) 854.4152 139.6560
1666 21.7180 883(30) 873.6663 139.6694
1667 21.7280 885(30) 868.5892 139.6827
1668 21.7380 1042(32) 1028.2777 139.6960
1669 21.7480 1502(39) 1516.7421 139.7092
1670 21.7580 2404(49) 2349.3921 139.7225
1671 21.7680 3424(59) 3147.8550 139.7357
1672 21.7780 3384(58) 3113.8872 139.7489
1673 21.7880 2528(50) 2265.7798 139.7621
1674 21.7980 1819(43) 1612.9591 139.7753
1675 21.8080 1706(41) 1517.2917 139.7884
1676 21.8180 2071(46) 2017.4197 139.8015
1677 21.8280 2866(54) 3073.1213 139.8146
1678 21.8380 3742(61) 4199.5342 139.8277
1679 21.8480 3699(61) 4274.7026 139.8407
1680 21.8580 2725(52) 3021.6238 139.8537
1681 21.8680 1742(42) 1786.5680 139.8667
1682 21.8780 1213(35) 1086.6681 139.8797
1683 21.8880 861(29) 752.2600 139.8926
1684 21.8980 665(26) 603.0563 139.9055
1685 21.9080 529(23) 536.7042 139.9184
1686 21.9180 475(22) 497.7982 139.9313
1687 21.9280 443(21) 462.2139 139.9441
1688 21.9380 427(21) 432.0617 139.9569
1689 21.9480 410(20) 420.2296 139.9697
1690 21.9580 523(23) 433.5410 139.9825
1691 21.9680 555(24) 483.3361 139.9952
1692 21.9780 738(27) 602.1797 140.0079
1693 21.9880 1032(32) 873.4818 140.0206
1694 21.9980 1733(42) 1437.7148 140.0333
1695 22.0080 2614(51) 2355.0271 140.0459
1696 22.0180 3800(62) 3289.5386 140.0585
1697 22.0280 3905(62) 3375.4133 140.0711
1698 22.0380 2846(53) 2407.1731 140.0836
1699 22.0480 1718(41) 1439.2317 140.0961
1700 22.0580 1036(32) 873.6841 140.1086
1701 22.0680 668(26) 589.1629 140.1211
1702 22.0780 478(22) 451.8992 140.1335
1703 22.0880 375(19) 383.0479 140.1459
1704 22.0980 324(18) 344.1103 140.1583
1705 22.1080 323(18) 318.1009 140.1706
1706 22.1180 260(16) 291.3119 140.1829
1707 22.1280 235(15) 269.8480 140.1952
1708 22.1380 247(16) 248.3501 140.2075
1709 22.1480 213(15) 231.5197 140.2197
1710 22.1580 225(15) 220.1715 140.2319
1711 22.1680 216(15) 213.0942 140.2440
1712 22.1780 219(15) 209.2902 140.2562
1713 22.1880 210(14) 199.3865 140.2683
1714 22.1980 270(16) 202.5508 140.2804
1715 22.2080 258(16) 211.3094 140.2924
1716 22.2180 288(17) 231.5716 140.3044
1717 22.2280 303(17) 276.3429 140.3164
1718 22.2380 337(18) 364.2760 140.3284
1719 22.2480 419(20) 502.1329 140.3403
1720 22.2580 561(24) 654.6097 140.3522
1721 22.2680 573(24) 734.4180 140.3640
1722 22.2780 506(22) 666.2151 140.3758
1723 22.2880 432(21) 519.8743 140.3876
1724 22.2980 361(19) 420.2130 140.3994
1725 22.3080 382(20) 401.2560 140.4111
1726 22.3180 470(22) 435.1199 140.4228
1727 22.3280 490(22) 467.0118 140.4344
1728 22.3380 553(24) 441.4519 140.4461
1729 22.3480 420(20) 366.5361 140.4577
1730 22.3580 306(17) 302.7817 140.4692
1731 22.3680 308(18) 268.4467 140.4807
1732 22.3780 325(18) 267.9290 140.4922
1733 22.3880 321(18) 269.9785 140.5037
1734 22.3980 315(18) 253.4258 140.5151
1735 22.4080 219(15) 222.6345 140.5265
1736 22.4180 220(15) 197.2741 140.5378
1737 22.4280 195(14) 183.6746 140.5491
1738 22.4380 194(14) 177.8464 140.5604
1739 22.4480 176(13) 174.1866 140.5717
1740 22.4580 172(13) 168.4286 140.5829
1741 22.4680 157(13) 161.5544 140.5941
1742 22.4780 158(13) 156.1702 140.6052
1743 22.4880 160(13) 152.6725 140.6163
1744 22.4980 165(13) 150.4655 140.6274
1745 22.5080 146(12) 149.0176 140.6384
1746 22.5180 161(13) 147.9540 140.6494
1747 22.5280 144(12) 147.1819 140.6604
1748 22.5380 152(12) 146.5554 140.6713
1749 22.5480 152(12) 146.0307 140.6822
1750 22.5580 156(12) 145.5865 140.6930
1751 22.5680 144(12) 145.2093 140.7038
1752 22.5780 153(12) 144.8886 140.7146
1753 22.5880 142(12) 144.6162 140.7254
1754 22.5980 148(12) 144.3854 140.7361
1755 22.6080 149(12) 144.1911 140.7467
1756 22.6180 118(11) 144.0298 140.7573
1757 22.6280 163(13) 143.8991 140.7679
1758 22.6380 150(12) 143.7977 140.7785
1759 22.6480 149(12) 143.7263 140.7890
1760 22.6580 144(12) 143.6868 140.7995
1761 22.6680 138(12) 142.7218 140.8099
1762 22.6780 143(12) 142.8106 140.8203
1763 22.6880 168(13) 142.9568 140.8307
1764 22.6980 131(11) 143.1896 140.8410
1765 22.7080 143(12) 143.5632 140.8513
1766 22.7180 167(13) 144.1942 140.8615
1767 22.7280 151(12) 144.9015 140.8717
1768 22.7380 154(12) 147.3082 140.8819
1769 22.7480 151(12) 152.2335 140.8920
1770 22.7580 172(13) 160.9672 140.9021
1771 22.7680 158(13) 172.8706 140.9121
1772 22.7780 162(13) 183.7776 140.9221
1773 22.7880 186(14) 184.6741 140.9321
1774 22.7980 163(13) 174.3159 140.9420
1775 22.8080 159(13) 161.5843 140.9519
1776 22.8180 152(12) 152.8118 140.9617
1777 22.8280 134(12) 147.9878 140.9715
1778 22.8380 142(12) 145.5712 140.9813
1779 22.8480 159(13) 144.3909 140.9910
1780 22.8580 123(11) 143.8367 141.0007
1781 22.8680 157(13) 143.5324 141.0103
1782 22.8780 143(12) 143.3354 141.0199
1783 22.8880 167(13) 143.1971 141.0294
1784 22.8980 143(12) 143.1064 141.0390
1785 22.9080 143(12) 143.0580 141.0484
1786 22.9180 145(12) 143.0473 141.0579
1787 22.9280 125(11) 143.0709 141.0673
1788 22.9380 122(11) 143.1261 141.0766
1789 22.9480 139(12) 143.2727 141.0859
1790 22.9580 145(12) 143.3927 141.0952
1791 22.9680 133(12) 143.5459 141.1044
1792 22.9780 151(12) 143.7358 141.1136
1793 22.9880 127(11) 143.9678 141.1227
1794 22.9980 148(12) 144.2497 141.1318
1795 23.0080 137(12) 144.5921 141.1408
1796 23.0180 155(12) 145.0896 141.1498
1797 23.0280 124(11) 145.6082 141.1588
1798 23.0380 155(12) 146.2549 141.1677
1799 23.0480 150(12) 147.0782 141.1766
1800 23.0580 146(12) 148.1568 141.1854
1801 23.0680 147(12) 149.8745 141.1942
1802 23.0780 162(13) 151.9830 141.2029
1803 23.0880 184(14) 155.1794 141.2116
1804 23.0980 168(13) 160.5021 141.2203
1805 23.1080 177(13) 170.4361 141.2289
1806 23.1180 205(14) 190.5294 141.2374
1807 23.1280 259(16) 229.4911 141.2460
1808 23.1380 316(18) 292.8362 141.2544
1809 23.1480 443(21) 369.0369 141.2629
1810 23.1580 540(23) 420.3640 141.2713
1811 23.1680 453(21) 401.7025 141.2796
1812 23.1780 353(19) 324.8493 141.2879
1813 23.1880 273(17) 250.0973 141.2962
1814 23.1980 244(16) 202.8323 141.3044
1815 23.2080 189(14) 178.1492 141.3125
1816 23.2180 170(13) 165.7387 141.3206
1817 23.2280 192(14) 159.9093 141.3287
1818 23.2380 166(13) 157.1540 141.3367
1819 23.2480 149(12) 155.7018 141.3447
1820 23.2580 150(12) 154.7979 141.3526
1821 23.2680 132(11) 154.2833 141.3605
1822 23.2780 155(12) 154.6114 141.3684
1823 23.2880 143(12) 156.7073 141.3762
1824 23.2980 171(13) 161.6101 141.3839
1825 23.3080 188(14) 169.4941 141.3916
1826 23.3180 183(14) 178.0820 141.3993
1827 23.3280 161(13) 182.2118 141.4069
1828 23.3380 162(13) 178.0550 141.4144
1829 23.3380 190(14) 178.0550 141.4144
1830 23.3580 184(14) 166.9152 141.4294
1831 23.3680 177(13) 169.6630 141.4369
1832 23.3780 203(14) 178.7805 141.4442
1833 23.3880 218(15) 191.7920 141.4516
1834 23.3980 186(14) 203.2287 141.4588
1835 23.4080 215(15) 208.6671 141.4661
1836 23.4180 215(15) 215.2712 141.4733
1837 23.4280 220(15) 234.9733 141.4804
1838 23.4380 276(17) 265.4386 141.4875
1839 23.4480 343(19) 287.5944 141.4945
1840 23.4580 319(18) 278.2291 141.5015
1841 23.4680 268(16) 243.1352 141.5085
1842 23.4780 250(16) 210.3441 141.5154
1843 23.4880 184(14) 190.8590 141.5222
1844 23.4980 199(14) 184.5327 141.5290
1845 23.5080 185(14) 190.2603 141.5358
1846 23.5180 205(14) 206.4002 141.5425
1847 23.5280 259(16) 228.0693 141.5492
1848 23.5380 279(17) 247.6623 141.5558
1849 23.5480 284(17) 263.8890 141.5623
1850 23.5580 338(18) 292.5734 141.5688
1851 23.5680 399(20) 351.2644 141.5753
1852 23.5780 404(20) 409.3154 141.5817
1853 23.5880 390(20) 422.8708 141.5881
1854 23.5880 315(18) 422.8708 141.5881
1855 23.6080 260(16) 286.6546 141.6007
1856 23.6180 228(15) 228.6083 141.6069
1857 23.6280 183(14) 195.7398 141.6131
1858 23.6380 184(14) 178.9917 141.6192
1859 23.6480 182(13) 170.9556 141.6253
1860 23.6580 171(13) 167.2217 141.6313
1861 23.6680 161(13) 165.4973 141.6373
1862 23.6780 169(13) 165.7817 141.6432
1863 23.6880 166(13) 165.9455 141.6491
1864 23.6980 176(13) 166.5878 141.6549
1865 23.7080 174(13) 167.2359 141.6607
1866 23.7180 161(13) 167.5585 141.6664
1867 23.7280 161(13) 167.9185 141.6721
1868 23.7380 157(13) 168.9897 141.6777
1869 23.7480 179(13) 170.8606 141.6833
1870 23.7580 182(13) 173.5478 141.6888
1871 23.7680 175(13) 177.1316 141.6943
1872 23.7780 163(13) 181.8190 141.6997
1873 23.7880 177(13) 188.0223 141.7050
1874 23.7980 178(13) 196.4187 141.7104
1875 23.8080 179(13) 208.3498 141.7157
1876 23.8180 235(15) 225.1721 141.7209
1877 23.8280 268(16) 248.2950 141.7260
1878 23.8380 319(18) 279.8745 141.7312
1879 23.8480 417(20) 327.0303 141.7362
1880 23.8580 480(22) 414.4694 141.7413
1881 23.8680 625(25) 593.9672 141.7462
1882 23.8780 1004(32) 936.8112 141.7511
1883 23.8880 1482(38) 1461.4808 141.7560
1884 23.8980 1829(43) 1990.7811 141.7608
1885 23.9080 1793(42) 2048.8257 141.7656
1886 23.9180 1414(38) 1555.5378 141.7703
1887 23.9280 1013(32) 1045.2710 141.7749
1888 23.9380 725(27) 708.0537 141.7796
1889 23.9480 539(23) 502.5594 141.7841
1890 23.9580 429(21) 386.9151 141.7886
1891 23.9680 338(18) 325.1218 141.7931
1892 23.9780 293(17) 291.6940 141.7975
1893 23.9880 307(18) 274.0454 141.8018
1894 23.9980 282(17) 269.9003 141.8061
1895 24.0080 305(17) 282.1329 141.8104
1896 24.0180 337(18) 321.3405 141.8146
1897 24.0280 439(21) 400.6913 141.8187
1898 24.0380 504(22) 517.7634 141.8228
1899 24.0480 652(26) 631.5370 141.8269
1900 24.0580 670(26) 661.7884 141.8309
1901 24.0680 586(24) 567.5946 141.8348
1902 24.0780 471(22) 433.1982 141.8387
1903 24.0880 339(18) 336.4571 141.8425
1904 24.0980 289(17) 284.1003 141.8463
1905 24.1080 279(17) 261.0578 141.8500
1906 24.1180 266(16) 255.2143 141.8537
1907 24.1280 252(16) 259.2982 141.8573
1908 24.1380 297(17) 270.5311 141.8609
1909 24.1480 290(17) 289.2276 141.8644
1910 24.1580 331(18) 318.6972 141.8679
1911 24.1680 399(20) 366.6149 141.8713
1912 24.1780 530(23) 450.3554 141.8746
1913 24.1880 696(26) 611.5461 141.8780
1914 24.1980 1017(32) 939.1691 141.8812
1915 24.2080 1719(41) 1556.2339 141.8844
1916 24.2180 2519(50) 2484.3657 141.8876
1917 24.2280 3621(60) 3341.5684 141.8907
1918 24.2380 3592(60) 3312.2505 141.8937
1919 24.2480 2534(50) 2332.0671 141.8967
1920 24.2580 1444(38) 1398.7083 141.8997
1921 24.2680 959(31) 858.5314 141.9025
1922 24.2780 719(27) 585.0338 141.9054
1923 24.2880 509(23) 449.7111 141.9082
1924 24.2980 412(20) 377.5049 141.9109
1925 24.3080 316(18) 332.1060 141.9136
1926 24.3180 302(17) 299.4998 141.9162
1927 24.3280 289(17) 274.7942 141.9187
1928 24.3380 264(16) 256.6852 141.9213
1929 24.3480 238(15) 243.5590 141.9237
1930 24.3580 208(14) 234.1408 141.9261
1931 24.3680 218(15) 227.9044 141.9285
1932 24.3780 229(15) 224.6077 141.9308
1933 24.3880 214(15) 224.2549 141.9330
1934 24.3980 223(15) 227.6233 141.9352
1935 24.4080 230(15) 232.0952 141.9374
1936 24.4180 225(15) 237.0331 141.9395
1937 24.4280 214(15) 241.8491 141.9415
1938 24.4380 247(16) 247.6241 141.9435
1939 24.4480 249(16) 255.9111 141.9454
1940 24.4580 304(17) 269.9277 141.9473
1941 24.4680 330(18) 296.4000 141.9491
1942 24.4780 407(20) 337.2984 141.9509
1943 24.4880 397(20) 391.9604 141.9526
1944 24.4980 524(23) 458.9358 141.9542
1945 24.5080 625(25) 554.1985 141.9558
1946 24.5180 811(28) 745.6099 141.9574
1947 24.5280 1098(33) 1149.4385 141.9589
1948 24.5380 1745(42) 1856.4833 141.9603
1949 24.5480 2542(50) 2745.2400 141.9617
1950 24.5580 2997(55) 3247.9937 141.9631
1951 24.5680 2729(52) 2725.2400 141.9643
1952 24.5780 1766(42) 1748.0031 141.9656
1953 24.5880 1173(34) 1045.9153 141.9668
1954 24.5980 805(28) 672.5040 141.9679
1955 24.6080 592(24) 485.8721 141.9689
1956 24.6180 429(21) 391.3510 141.9700
1957 24.6280 328(18) 337.5345 141.9709
1958 24.6380 317(18) 301.6374 141.9718
1959 24.6480 279(17) 275.7612 141.9727
1960 24.6580 257(16) 257.3896 141.9735
1961 24.6680 222(15) 245.5911 141.9742
1962 24.6780 264(16) 240.5264 141.9749
1963 24.6880 261(16) 244.2322 141.9755
1964 24.6980 293(17) 262.0786 141.9761
1965 24.7080 345(19) 303.8027 141.9767
1966 24.7180 436(21) 379.7126 141.9771
1967 24.7280 600(24) 485.1221 141.9775
1968 24.7380 680(26) 575.8536 141.9779
1969 24.7480 625(25) 567.9337 141.9782
1970 24.7580 416(20) 448.9567 141.9785
1971 24.7680 386(20) 329.4542 141.9787
1972 24.7780 279(17) 258.3653 141.9788
1973 24.7880 233(15) 220.2282 141.9789
1974 24.7980 218(15) 200.6993 141.9790
1975 24.8080 192(14) 190.1346 141.9790
1976 24.8180 200(14) 183.7531 141.9789
1977 24.8280 175(13) 179.9056 141.9788
1978 24.8380 167(13) 178.1823 141.9786
1979 24.8480 174(13) 178.1943 141.9784
1980 24.8580 171(13) 178.7077 141.9781
1981 24.8680 144(12) 177.9792 141.9777
1982 24.8780 179(13) 176.1784 141.9773
1983 24.8880 196(14) 176.3466 141.9769
1984 24.8980 198(14) 179.9188 141.9764
1985 24.9080 184(14) 185.3255 141.9758
1986 24.9180 176(13) 180.2047 141.9752
1987 24.9280 182(13) 175.8005 141.9746
1988 24.9380 193(14) 167.5901 141.9739
1989 24.9480 177(13) 161.0703 141.9731
1990 24.9580 164(13) 157.4105 141.9723
1991 24.9680 157(13) 155.8212 141.9714
1992 24.9780 178(13) 155.8853 141.9704
1993 24.9880 166(13) 156.3590 141.9695
1994 24.9980 159(13) 157.3768 141.9684
1995 25.0080 151(12) 158.8911 141.9673
1996 25.0180 172(13) 160.9862 141.9662
1997 25.0280 158(13) 163.8607 141.9650
1998 25.0380 159(13) 167.8764 141.9637
1999 25.0480 186(14) 173.7070 141.9624
2000 25.0580 201(14) 182.6841 141.9610
2001 25.0680 194(14) 197.6709 141.9596
2002 25.0780 265(16) 225.2608 141.9581
2003 25.0880 281(17) 278.9623 141.9566
2004 25.0980 364(19) 379.1960 141.9550
2005 25.1080 508(23) 533.8730 141.9534
2006 25.1180 689(26) 701.8561 141.9517
2007 25.1280 673(26) 755.1757 141.9500
2008 25.1380 528(23) 619.9999 141.9482
2009 25.1480 399(20) 448.0793 141.9463
2010 25.1580 336(18) 338.1025 141.9444
2011 25.1680 273(17) 274.7502 141.9424
2012 25.1780 255(16) 233.3425 141.9404
2013 25.1880 211(15) 206.1748 141.9383
2014 25.1980 181(13) 189.2210 141.9362
2015 25.2080 199(14) 178.4929 141.9340
2016 25.2180 188(14) 171.6629 141.9318
2017 25.2280 153(12) 166.9614 141.9295
2018 25.2380 162(13) 163.7452 141.9272
2019 25.2480 174(13) 161.5239 141.9248
2020 25.2580 176(13) 160.0613 141.9223
2021 25.2680 143(12) 159.2717 141.9198
2022 25.2780 165(13) 159.2395 141.9173
2023 25.2880 172(13) 160.1226 141.9147
2024 25.2980 171(13) 162.3921 141.9120
2025 25.3080 191(14) 167.2347 141.9093
2026 25.3180 201(14) 177.3651 141.9065
2027 25.3280 178(13) 197.8723 141.9037
2028 25.3380 213(15) 235.1826 141.9008
2029 25.3480 238(15) 284.0613 141.8979
2030 25.3580 254(16) 328.0122 141.8949
2031 25.3680 285(17) 334.8854 141.8919
2032 25.3780 285(17) 293.5209 141.8888
2033 25.3880 263(16) 240.1799 141.8857
2034 25.3980 202(14) 202.7242 141.8825
2035 25.4080 187(14) 182.1111 141.8792
2036 25.4180 171(13) 173.0466 141.8759
2037 25.4280 200(14) 171.9991 141.8725
2038 25.4380 164(13) 176.8907 141.8691
2039 25.4480 194(14) 186.0695 141.8657
2040 25.4580 170(13) 195.3870 141.8622
2041 25.4680 193(14) 197.6455 141.8586
2042 25.4780 175(13) 189.2539 141.8550
2043 25.4880 174(13) 176.2390 141.8513
2044 25.4980 158(13) 168.7368 141.8475
2045 25.5080 168(13) 166.3436 141.8438
2046 25.5180 176(13) 168.4116 141.8399
2047 25.5280 171(13) 173.9153 141.8360
2048 25.5380 163(13) 180.7407 141.8321
2049 25.5480 164(13) 185.7349 141.8281
2050 25.5580 162(13) 188.3491 141.8241
2051 25.5680 212(15) 194.7697 141.8199
2052 25.5780 228(15) 210.6091 141.8158
2053 25.5780 234(15) 210.6091 141.8158
2054 25.5980 285(17) 256.3015 141.8073
2055 25.6080 297(17) 260.4706 141.8030
2056 25.6180 285(17) 245.3927 141.7986
2057 25.6280 264(16) 231.3754 141.7942
2058 25.6380 283(17) 233.5095 141.7898
2059 25.6480 317(18) 261.1377 141.7852
2060 25.6580 342(18) 328.3215 141.7807
2061 25.6680 497(22) 449.1964 141.7760
2062 25.6780 620(25) 609.6536 141.7713
2063 25.6880 767(28) 726.2553 141.7666
2064 25.6980 777(28) 672.3267 141.7618
2065 25.7080 583(24) 499.2251 141.7570
2066 25.7180 440(21) 357.5301 141.7521
2067 25.7280 382(20) 278.2236 141.7471
2068 25.7380 291(17) 242.1136 141.7422
2069 25.7480 274(17) 233.7360 141.7371
2070 25.7580 246(16) 246.8781 141.7320
2071 25.7680 286(17) 278.8695 141.7269
2072 25.7780 293(17) 323.0602 141.7216
2073 25.7880 391(20) 360.4662 141.7164
2074 25.7980 373(19) 366.7262 141.7111
2075 25.8080 382(20) 343.7701 141.7057
2076 25.8180 315(18) 303.3925 141.7003
2077 25.8280 262(16) 256.9630 141.6948
2078 25.8380 226(15) 218.4726 141.6893
2079 25.8480 206(14) 193.0789 141.6838
2080 25.8580 199(14) 178.5497 141.6781
2081 25.8680 187(14) 170.7607 141.6725
2082 25.8780 170(13) 166.8973 141.6667
2083 25.8880 200(14) 165.3230 141.6610
2084 25.8980 181(13) 165.6842 141.6552
2085 25.9080 163(13) 168.7197 141.6493
2086 25.9180 194(14) 176.0171 141.6433
2087 25.9280 181(13) 188.7107 141.6374
2088 25.9380 222(15) 204.8633 141.6313
2089 25.9480 222(15) 217.2627 141.6252
2090 25.9580 222(15) 216.4047 141.6191
2091 25.9680 205(14) 204.9052 141.6129
2092 25.9780 182(13) 197.8343 141.6067
2093 25.9880 216(15) 203.5621 141.6004
2094 25.9980 202(14) 221.4238 141.5941
2095 26.0080 246(16) 242.7213 141.5877
2096 26.0180 253(16) 251.4217 141.5812
2097 26.0280 268(16) 235.3777 141.5748
2098 26.0380 231(15) 208.0070 141.5682
2099 26.0480 215(15) 186.9002 141.5616
2100 26.0580 190(14) 173.3573 141.5550
2101 26.0680 174(13) 167.9459 141.5483
2102 26.0780 197(14) 166.6740 141.5415
2103 26.0880 184(14) 168.1944 141.5347
2104 26.0980 191(14) 172.2744 141.5279
2105 26.1080 195(14) 179.9900 141.5210
2106 26.1180 242(16) 194.0743 141.5141
2107 26.1280 250(16) 219.8687 141.5071
2108 26.1380 299(17) 265.4359 141.5000
2109 26.1480 352(19) 339.7068 141.4929
2110 26.1580 451(21) 440.3196 141.4858
2111 26.1680 603(25) 548.4631 141.4786
2112 26.1780 669(26) 618.5772 141.4714
2113 26.1880 627(25) 596.0444 141.4641
2114 26.1980 517(23) 495.3770 141.4567
2115 26.2080 344(19) 376.7872 141.4493
2116 26.2180 303(17) 284.2104 141.4419
2117 26.2280 243(16) 227.7345 141.4344
2118 26.2380 216(15) 197.1020 141.4269
2119 26.2480 193(14) 181.1202 141.4193
2120 26.2580 188(14) 172.4841 141.4116
2121 26.2680 191(14) 167.2553 141.4039
2122 26.2780 161(13) 163.6244 141.3962
2123 26.2880 160(13) 160.8856 141.3884
2124 26.2980 155(12) 158.7838 141.3806
2125 26.3080 182(13) 157.2072 141.3727
2126 26.3180 144(12) 165.6708 141.3648
2127 26.3280 163(13) 165.4960 141.3568
2128 26.3380 168(13) 165.7682 141.3488
2129 26.3480 181(13) 166.5278 141.3407
2130 26.3580 157(13) 167.7750 141.3326
2131 26.3680 142(12) 170.0515 141.3244
2132 26.3780 187(14) 173.9161 141.3161
2133 26.3880 170(13) 180.8121 141.3079
2134 26.3980 178(13) 193.2792 141.2996
2135 26.4080 208(14) 212.5548 141.2912
2136 26.4180 243(16) 236.8314 141.2828
2137 26.4280 294(17) 257.0686 141.2743
2138 26.4380 301(17) 259.9864 141.2658
2139 26.4480 280(17) 244.5203 141.2572
2140 26.4580 254(16) 228.4462 141.2486
2141 26.4680 234(15) 223.2274 141.2400
2142 26.4780 243(16) 230.1600 141.2313
2143 26.4880 255(16) 249.3556 141.2225
2144 26.4980 298(17) 284.1544 141.2137
2145 26.5080 354(19) 342.3391 141.2049
2146 26.5180 490(22) 427.1742 141.1960
2147 26.5280 557(24) 517.1873 141.1870
2148 26.5380 589(24) 558.5217 141.1781
2149 26.5480 576(24) 509.5354 141.1690
2150 26.5580 474(22) 417.9760 141.1600
2151 26.5680 410(20) 348.6919 141.1508
2152 26.5780 326(18) 314.6702 141.1416
2153 26.5880 334(18) 307.1829 141.1324
2154 26.5980 322(18) 319.9403 141.1232
2155 26.6080 387(20) 350.7463 141.1138
2156 26.6180 519(23) 403.6237 141.1045
2157 26.6280 574(24) 493.8915 141.0951
2158 26.6380 817(29) 658.7767 141.0856
2159 26.6480 1097(33) 974.1377 141.0761
2160 26.6580 1698(41) 1549.6824 141.0666
2161 26.6680 2486(50) 2436.6230 141.0570
2162 26.6780 3481(59) 3430.2092 141.0474
2163 26.6880 3879(62) 3872.4250 141.0377
2164 26.6980 3154(56) 3202.3455 141.0280
2165 26.7080 2146(46) 2105.1970 141.0182
2166 26.7180 1363(37) 1304.5505 141.0084
2167 26.7280 970(31) 849.0730 140.9985
2168 26.7380 739(27) 611.0481 140.9886
2169 26.7480 567(24) 491.0593 140.9787
2170 26.7580 546(23) 438.9449 140.9687
2171 26.7680 453(21) 415.3173 140.9586
2172 26.7780 423(21) 412.0424 140.9485
2173 26.7880 395(20) 412.6703 140.9384
2174 26.7980 341(18) 395.9233 140.9282
2175 26.8080 360(19) 359.4450 140.9180
2176 26.8180 325(18) 327.9260 140.9077
2177 26.8280 301(17) 313.5107 140.8974
2178 26.8380 296(17) 307.4476 140.8871
2179 26.8480 273(17) 294.0674 140.8767
2180 26.8580 242(16) 269.1984 140.8662
2181 26.8680 243(16) 245.6173 140.8557
2182 26.8780 239(15) 230.6734 140.8452
2183 26.8880 220(15) 224.1650 140.8346
2184 26.8980 230(15) 225.7234 140.8240
2185 26.9080 207(14) 236.6842 140.8133
2186 26.9180 264(16) 256.5486 140.8026
2187 26.9280 306(17) 279.0048 140.7919
2188 26.9380 306(17) 290.1840 140.7811
2189 26.9480 267(16) 278.2982 140.7702
2190 26.9580 241(16) 257.0711 140.7594
2191 26.9680 230(15) 243.9740 140.7485
2192 26.9780 213(15) 244.2218 140.7375
2193 26.9880 242(16) 256.0149 140.7265
2194 26.9980 261(16) 275.2206 140.7154
2195 27.0080 273(17) 296.5316 140.7043
2196 27.0180 278(17) 316.9610 140.6932
2197 27.0280 328(18) 330.4092 140.6820
2198 27.0380 321(18) 328.6694 140.6708
2199 27.0480 277(17) 322.7662 140.6595
2200 27.0580 281(17) 331.8100 140.6482
2201 27.0680 339(18) 357.6882 140.6369
2202 27.0780 430(21) 434.1800 140.6255
2203 27.0880 486(22) 585.4587 140.6141
2204 27.0980 689(26) 873.0418 140.6026
2205 27.1080 1124(34) 1358.5796 140.5911
2206 27.1180 1893(44) 2010.5691 140.5795
2207 27.1280 2782(53) 2562.5303 140.5679
2208 27.1380 2941(54) 2514.9763 140.5563
2209 27.1480 2150(46) 1859.4813 140.5446
2210 27.1580 1184(34) 1197.1055 140.5329
2211 27.1680 692(26) 773.9022 140.5212
2212 27.1780 492(22) 541.7272 140.5094
2213 27.1880 358(19) 420.3501 140.4975
2214 27.1980 295(17) 354.0035 140.4856
2215 27.2080 261(16) 310.3459 140.4737
2216 27.2180 230(15) 277.2681 140.4618
2217 27.2280 211(15) 251.8477 140.4498
2218 27.2380 218(15) 232.7198 140.4377
2219 27.2480 191(14) 218.4687 140.4256
2220 27.2580 187(14) 207.7737 140.4135
2221 27.2680 187(14) 200.0978 140.4014
2222 27.2780 175(13) 194.8727 140.3892
2223 27.2880 188(14) 191.9805 140.3769
2224 27.2980 211(15) 191.9337 140.3647
2225 27.3080 162(13) 195.9450 140.3523
2226 27.3180 221(15) 205.7039 140.3400
2227 27.3280 222(15) 221.5596 140.3276
2228 27.3380 204(14) 239.2627 140.3152
2229 27.3480 214(15) 249.0070 140.3027
2230 27.3580 247(16) 243.6038 140.2902
2231 27.3680 236(15) 224.3233 140.2776
2232 27.3780 206(14) 202.0584 140.2650
2233 27.3880 180(13) 185.6701 140.2524
2234 27.3980 197(14) 176.2788 140.2397
2235 27.4080 207(14) 172.2737 140.2270
2236 27.4180 168(13) 172.5537 140.2143
2237 27.4280 168(13) 176.7378 140.2015
2238 27.4380 168(13) 184.1212 140.1887
2239 27.4480 178(13) 195.7594 140.1759
2240 27.4580 182(13) 201.2963 140.1630
2241 27.4680 192(14) 199.9554 140.1500
2242 27.4780 205(14) 196.4891 140.1371
2243 27.4880 180(13) 199.5612 140.1241
2244 27.4980 214(15) 215.5997 140.1110
2245 27.5080 271(16) 249.9447 140.0980
2246 27.5180 336(18) 296.6331 140.0849
2247 27.5280 414(20) 353.5887 140.0717
2248 27.5380 403(20) 374.6468 140.0585
2249 27.5480 385(20) 333.1293 140.0453
2250 27.5580 302(17) 269.9634 140.0320
2251 27.5680 249(16) 222.9270 140.0188
2252 27.5780 223(15) 195.5647 140.0054
2253 27.5880 215(15) 181.7819 139.9921
2254 27.5980 188(14) 176.1789 139.9787
2255 27.6080 179(13) 175.0870 139.9652
2256 27.6180 181(13) 176.1321 139.9518
2257 27.6280 197(14) 176.9318 139.9382
2258 27.6380 218(15) 176.9793 139.9247
2259 27.6480 229(15) 177.0592 139.9111
2260 27.6580 225(15) 176.0792 139.8975
2261 27.6680 191(14) 173.1055 139.8839
2262 27.6780 189(14) 170.4627 139.8702
2263 27.6880 169(13) 169.7270 139.8565
2264 27.6980 182(13) 170.8494 139.8427
2265 27.7080 169(13) 173.5520 139.8289
2266 27.7180 171(13) 177.7925 139.8151
2267 27.7280 212(15) 185.6532 139.8013
2268 27.7380 203(14) 194.4267 139.7874
2269 27.7480 214(15) 207.3019 139.7735
2270 27.7580 255(16) 227.2596 139.7595
2271 27.7680 301(17) 260.7865 139.7456
2272 27.7780 365(19) 321.4873 139.7315
2273 27.7880 468(22) 432.7576 139.7175
2274 27.7980 626(25) 620.8131 139.7034
2275 27.8080 844(29) 886.4204 139.6893
2276 27.8180 1177(34) 1146.9739 139.6752
2277 27.8280 1312(36) 1218.7155 139.6610
2278 27.8380 1202(35) 1003.7048 139.6468
2279 27.8480 857(29) 706.2374 139.6325
2280 27.8580 633(25) 488.4518 139.6182
2281 27.8680 465(22) 359.6470 139.6039
2282 27.8780 365(19) 290.0969 139.5896
2283 27.8880 310(18) 255.6099 139.5752
2284 27.8980 229(15) 236.4657 139.5608
2285 27.9080 235(15) 224.4277 139.5464
2286 27.9180 257(16) 214.1903 139.5319
2287 27.9280 202(14) 204.0042 139.5174
2288 27.9380 194(14) 196.9923 139.5029
2289 27.9480 202(14) 192.2750 139.4883
2290 27.9580 176(13) 190.1984 139.4738
2291 27.9680 178(13) 190.8268 139.4591
2292 27.9780 173(13) 194.8810 139.4445
2293 27.9880 200(14) 203.7465 139.4298
2294 27.9980 222(15) 218.3287 139.4151
2295 28.0080 262(16) 236.8811 139.4004
2296 28.0180 280(17) 253.0595 139.3856
2297 28.0280 281(17) 257.9560 139.3708
2298 28.0380 271(16) 253.2470 139.3560
2299 28.0480 257(16) 253.3022 139.3411
2300 28.0580 269(16) 270.0848 139.3262
2301 28.0680 316(18) 312.8786 139.3113
2302 28.0780 398(20) 397.0922 139.2964
2303 28.0880 552(23) 534.7357 139.2814
2304 28.0980 769(28) 711.9768 139.2664
2305 28.1080 1021(32) 856.4060 139.2514
2306 28.1180 1081(33) 847.7955 139.2363
2307 28.1280 885(30) 697.9918 139.2212
2308 28.1380 713(27) 560.4651 139.2061
2309 28.1480 553(24) 509.7356 139.1909
2310 28.1580 574(24) 556.0876 139.1758
2311 28.1680 719(27) 692.5424 139.1606
2312 28.1780 856(29) 878.4425 139.1454
2313 28.1880 992(31) 1003.3571 139.1301
2314 28.1980 873(30) 931.1528 139.1148
2315 28.2080 645(25) 722.6487 139.0995
2316 28.2180 493(22) 546.0763 139.0842
2317 28.2280 449(21) 452.4780 139.0688
2318 28.2380 449(21) 442.5441 139.0535
2319 28.2480 467(22) 506.0806 139.0380
2320 28.2580 627(25) 628.4563 139.0226
2321 28.2680 765(28) 761.2553 139.0071
2322 28.2780 804(28) 802.0668 138.9917
2323 28.2880 752(27) 690.8787 138.9761
2324 28.2980 622(25) 535.7312 138.9606
2325 28.3080 514(23) 436.2928 138.9450
2326 28.3180 444(21) 404.2975 138.9294
2327 28.3280 493(22) 418.0986 138.9138
2328 28.3380 513(23) 442.3297 138.8982
2329 28.3480 567(24) 432.8623 138.8825
2330 28.3580 517(23) 376.9416 138.8668
2331 28.3680 384(20) 312.1886 138.8511
2332 28.3780 323(18) 264.2429 138.8354
2333 28.3880 312(18) 234.4789 138.8196
2334 28.3980 224(15) 219.8461 138.8038
2335 28.4080 239(15) 218.7492 138.7880
2336 28.4180 260(16) 232.4237 138.7722
2337 28.4280 262(16) 264.2503 138.7563
2338 28.4380 248(16) 314.1174 138.7405
2339 28.4480 260(16) 370.3414 138.7246
2340 28.4580 314(18) 403.0854 138.7086
2341 28.4680 327(18) 382.4316 138.6927
2342 28.4780 327(18) 325.2338 138.6767
2343 28.4880 241(16) 268.3551 138.6607
2344 28.4980 235(15) 227.3335 138.6447
2345 28.5080 193(14) 203.1364 138.6287
2346 28.5180 201(14) 188.6780 138.6126
2347 28.5280 158(13) 180.9701 138.5965
2348 28.5380 164(13) 174.6097 138.5804
2349 28.5480 179(13) 170.0117 138.5643
2350 28.5580 166(13) 168.3590 138.5482
2351 28.5680 139(12) 170.0162 138.5320
2352 28.5780 171(13) 174.5089 138.5158
2353 28.5880 188(14) 179.9405 138.4996
2354 28.5980 194(14) 180.0866 138.4834
2355 28.6080 171(13) 175.6253 138.4671
2356 28.6180 162(13) 167.4045 138.4509
2357 28.6280 167(13) 160.0117 138.4346
2358 28.6380 160(13) 154.8864 138.4183
2359 28.6480 157(13) 152.0821 138.4019
2360 28.6580 165(13) 150.8944 138.3856
2361 28.6680 154(12) 151.0551 138.3692
2362 28.6780 148(12) 151.2541 138.3528
2363 28.6880 159(13) 155.3967 138.3364
2364 28.6980 157(13) 162.8731 138.3200
2365 28.7080 161(13) 173.5901 138.3035
2366 28.7180 203(14) 185.8791 138.2871
2367 28.7280 198(14) 190.9773 138.2706
2368 28.7380 183(14) 184.6016 138.2541
2369 28.7480 169(13) 171.9110 138.2376
2370 28.7580 175(13) 161.0743 138.2210
2371 28.7680 130(11) 154.4648 138.2045
2372 28.7780 174(13) 150.8617 138.1879
2373 28.7880 155(12) 149.2814 138.1713
2374 28.7980 155(12) 148.9744 138.1547
2375 28.8080 164(13) 149.7440 138.1381
2376 28.8180 170(13) 151.8443 138.1215
2377 28.8280 172(13) 155.9547 138.1048
2378 28.8380 143(12) 162.5909 138.0881
2379 28.8480 180(13) 171.0240 138.0715
2380 28.8580 162(13) 178.1985 138.0547
2381 28.8680 188(14) 179.1353 138.0380
2382 28.8780 151(12) 172.2007 138.0213
2383 28.8880 156(12) 164.0028 138.0045
2384 28.8980 180(13) 160.2083 137.9878
2385 28.9080 139(12) 157.0726 137.9710
2386 28.9180 149(12) 156.0232 137.9542
2387 28.9280 141(12) 156.4921 137.9374
2388 28.9380 143(12) 158.2342 137.9205
2389 28.9480 154(12) 161.4929 137.9037
2390 28.9580 165(13) 167.0793 137.8869
2391 28.9680 175(13) 176.2835 137.8700
2392 28.9780 197(14) 190.1135 137.8531
2393 28.9880 192(14) 208.0299 137.8362
2394 28.9980 201(14) 226.7247 137.8193
2395 29.0080 222(15) 241.3906 137.8024
2396 29.0180 224(15) 252.2280 137.7854
2397 29.0280 212(15) 262.3251 137.7685
2398 29.0380 265(16) 268.1471 137.7515
2399 29.0480 276(17) 266.9449 137.7345
2400 29.0580 230(15) 267.3636 137.7175
2401 29.0680 258(16) 279.4050 137.7005
2402 29.0780 286(17) 314.8938 137.6835
2403 29.0880 318(18) 385.5449 137.6665
2404 29.0980 444(21) 489.1846 137.6495
2405 29.1080 551(23) 594.0519 137.6324
2406 29.1180 623(25) 631.9428 137.6153
2407 29.1280 581(24) 571.2877 137.5983
2408 29.1380 526(23) 491.0964 137.5812
2409 29.1480 421(21) 457.4315 137.5641
2410 29.1580 413(20) 467.0735 137.5470
2411 29.1680 513(23) 477.4822 137.5299
2412 29.1780 455(21) 440.1187 137.5127
2413 29.1880 360(19) 366.7776 137.4956
2414 29.1980 304(17) 302.4655 137.4785
2415 29.2080 243(16) 262.3615 137.4613
2416 29.2180 247(16) 242.3412 137.4441
2417 29.2280 202(14) 236.8757 137.4270
2418 29.2380 251(16) 243.4643 137.4098
2419 29.2480 241(16) 264.0492 137.3926
2420 29.2580 299(17) 307.0467 137.3754
2421 29.2680 360(19) 388.4724 137.3582
2422 29.2780 481(22) 526.1043 137.3410
2423 29.2880 604(25) 720.1776 137.3237
2424 29.2980 812(28) 922.7878 137.3065
2425 29.3080 918(30) 1012.0113 137.2892
2426 29.3180 901(30) 889.0175 137.2720
2427 29.3280 677(26) 663.0275 137.2547
2428 29.3380 479(22) 477.2985 137.2375
2429 29.3480 400(20) 359.9307 137.2202
2430 29.3580 291(17) 290.8666 137.2029
2431 29.3680 266(16) 249.1148 137.1856
2432 29.3780 228(15) 222.8661 137.1683
2433 29.3880 193(14) 205.8265 137.1510
2434 29.3980 185(14) 194.2917 137.1337
2435 29.4080 164(13) 186.0212 137.1164
2436 29.4180 155(12) 180.1759 137.0991
2437 29.4280 169(13) 176.1725 137.0818
2438 29.4380 166(13) 174.1147 137.0644
2439 29.4480 175(13) 174.3589 137.0471
2440 29.4580 165(13) 177.5589 137.0298
2441 29.4680 182(13) 184.7902 137.0124
2442 29.4780 200(14) 195.7410 136.9951
2443 29.4880 212(15) 207.8411 136.9777
2444 29.4980 224(15) 216.4307 136.9604
2445 29.5080 219(15) 219.1284 136.9430
2446 29.5180 218(15) 219.7246 136.9256
2447 29.5280 225(15) 220.4633 136.9082
2448 29.5380 200(14) 222.1157 136.8909
2449 29.5480 221(15) 232.0853 136.8735
2450 29.5580 247(16) 251.5962 136.8561
2451 29.5680 285(17) 275.1822 136.8387
2452 29.5780 351(19) 302.8812 136.8214
2453 29.5880 393(20) 330.4760 136.8040
2454 29.5980 416(20) 339.3589 136.7866
2455 29.6080 320(18) 309.6949 136.7692
2456 29.6180 284(17) 259.3757 136.7518
2457 29.6280 231(15) 216.6533 136.7344
2458 29.6380 213(15) 189.0355 136.7170
2459 29.6480 186(14) 172.9084 136.6996
2460 29.6580 168(13) 163.9081 136.6822
2461 29.6680 149(12) 158.8565 136.6648
2462 29.6780 151(12) 155.8561 136.6474
2463 29.6880 137(12) 153.8990 136.6300
2464 29.6980 156(12) 152.5337 136.6126
2465 29.7080 148(12) 151.5943 136.5952
2466 29.7180 134(12) 151.0632 136.5778
2467 29.7280 150(12) 148.6947 136.5604
2468 29.7380 153(12) 149.0068 136.5430
2469 29.7480 151(12) 149.8859 136.5256
2470 29.7580 154(12) 151.6269 136.5082
2471 29.7680 168(13) 154.8861 136.4908
2472 29.7780 144(12) 160.6687 136.4734
2473 29.7880 168(13) 169.9094 136.4560
2474 29.7980 166(13) 182.5847 136.4386
2475 29.8080 190(14) 195.3986 136.4212
2476 29.8180 199(14) 201.5964 136.4038
2477 29.8280 174(13) 197.0304 136.3864
2478 29.8380 178(13) 187.2245 136.3690
2479 29.8480 174(13) 178.6641 136.3516
2480 29.8580 186(14) 174.3937 136.3342
2481 29.8680 161(13) 175.0971 136.3169
2482 29.8780 195(14) 179.7702 136.2995
2483 29.8880 193(14) 186.2825 136.2821
2484 29.8980 210(14) 192.3209 136.2648
2485 29.9080 195(14) 199.0308 136.2474
2486 29.9180 215(15) 212.8464 136.2300
2487 29.9280 234(15) 241.6741 136.2127
2488 29.9380 243(16) 293.4702 136.1953
2489 29.9380 300(17) 293.4702 136.1953
2490 29.9580 415(20) 470.0658 136.1606
2491 29.9680 468(22) 555.1506 136.1433
2492 29.9780 480(22) 567.9204 136.1260
2493 29.9880 400(20) 488.7012 136.1086
2494 29.9980 312(18) 379.3826 136.0913
2495 30.0080 272(16) 297.2634 136.0740
2496 30.0180 227(15) 248.9647 136.0567
2497 30.0280 197(14) 225.8889 136.0394
2498 30.0380 212(15) 219.6820 136.0221
2499 30.0480 183(14) 220.4963 136.0048
2500 30.0580 216(15) 218.5195 135.9875
2501 30.0680 185(14) 207.5970 135.9703
2502 30.0780 215(15) 192.5576 135.9530
2503 30.0880 150(12) 180.8329 135.9357
2504 30.0980 171(13) 174.6931 135.9185
2505 30.1080 181(13) 173.4599 135.9012
2506 30.1180 166(13) 175.6982 135.8840
2507 30.1280 162(13) 179.0049 135.8668
2508 30.1380 187(14) 180.1747 135.8496
2509 30.1480 191(14) 177.7959 135.8324
2510 30.1580 158(13) 174.3768 135.8152
2511 30.1680 170(13) 172.2354 135.7980
2512 30.1780 175(13) 172.2254 135.7808
2513 30.1880 193(14) 175.5294 135.7636
2514 30.1980 175(13) 182.4511 135.7465
2515 30.2080 177(13) 190.8683 135.7293
2516 30.2180 205(14) 195.6835 135.7122
2517 30.2280 197(14) 192.4295 135.6950
2518 30.2380 172(13) 184.9733 135.6779
2519 30.2480 169(13) 179.0955 135.6608
2520 30.2580 179(13) 176.9021 135.6437
2521 30.2680 174(13) 176.8036 135.6266
2522 30.2780 153(12) 177.7398 135.6096
2523 30.2880 183(14) 179.7883 135.5925
2524 30.2980 161(13) 183.5808 135.5754
2525 30.3080 192(14) 189.4794 135.5584
2526 30.3180 205(14) 198.4399 135.5414
2527 30.3280 204(14) 212.1914 135.5244
2528 30.3380 273(17) 235.8659 135.5074
2529 30.3480 278(17) 272.4539 135.4904
2530 30.3580 331(18) 335.7613 135.4734
2531 30.3680 386(20) 444.6124 135.4565
2532 30.3780 539(23) 616.8698 135.4395
2533 30.3880 843(29) 849.7499 135.4226
2534 30.3980 1052(32) 1090.2352 135.4057
2535 30.4080 1159(34) 1208.9203 135.3887
2536 30.4180 1105(33) 1098.9540 135.3719
2537 30.4280 953(31) 855.8867 135.3550
2538 30.4380 671(26) 634.2922 135.3381
2539 30.4480 485(22) 482.7134 135.3213
2540 30.4580 416(20) 389.3019 135.3045
2541 30.4680 332(18) 330.5911 135.2877
2542 30.4780 284(17) 290.0581 135.2709
2543 30.4880 248(16) 262.8718 135.2541
2544 30.4980 214(15) 245.3316 135.2373
2545 30.5080 224(15) 233.2520 135.2206
2546 30.5180 207(14) 222.6329 135.2038
2547 30.5280 222(15) 210.3189 135.1871
2548 30.5380 181(13) 197.6526 135.1704
2549 30.5480 164(13) 187.6479 135.1537
2550 30.5580 171(13) 180.9614 135.1371
2551 30.5680 167(13) 176.9607 135.1205
2552 30.5780 153(12) 174.9379 135.1038
2553 30.5880 167(13) 174.5814 135.0872
2554 30.5980 172(13) 178.6724 135.0706
2555 30.6080 165(13) 182.0783 135.0541
2556 30.6180 176(13) 188.7225 135.0375
2557 30.6280 203(14) 200.5742 135.0210
2558 30.6380 247(16) 219.9444 135.0045
2559 30.6480 283(17) 247.9077 134.9880
2560 30.6580 312(18) 281.5779 134.9715
2561 30.6680 346(19) 312.1573 134.9551
2562 30.6780 400(20) 329.6494 134.9386
2563 30.6880 374(19) 332.2881 134.9222
2564 30.6980 359(19) 323.5842 134.9058
2565 30.7080 309(18) 317.2952 134.8895
2566 30.7180 347(19) 331.1219 134.8731
2567 30.7280 350(19) 377.3953 134.8568
2568 30.7380 462(21) 467.8812 134.8405
2569 30.7480 547(23) 607.7843 134.8242
2570 30.7580 700(26) 774.7445 134.8080
2571 30.7680 873(30) 898.1951 134.7917
2572 30.7780 871(30) 879.5623 134.7755
2573 30.7880 759(28) 725.3563 134.7593
2574 30.7980 508(23) 552.3894 134.7431
2575 30.8080 399(20) 424.3482 134.7270
2576 30.8180 345(19) 343.7379 134.7109
2577 30.8280 303(17) 300.4525 134.6948
2578 30.8380 275(17) 286.6259 134.6787
2579 30.8480 270(16) 294.1334 134.6627
2580 30.8580 280(17) 321.7660 134.6466
2581 30.8680 343(19) 355.5041 134.6306
2582 30.8780 364(19) 373.2947 134.6147
2583 30.8880 362(19) 353.9159 134.5987
2584 30.8980 321(18) 309.8416 134.5828
2585 30.9080 240(15) 269.2603 134.5669
2586 30.9180 234(15) 242.9685 134.5510
2587 30.9280 206(14) 229.7500 134.5351
2588 30.9380 226(15) 226.6320 134.5193
2589 30.9480 216(15) 231.9026 134.5035
2590 30.9580 248(16) 245.9049 134.4878
2591 30.9680 254(16) 272.4812 134.4720
2592 30.9780 313(18) 320.6306 134.4563
2593 30.9880 372(19) 406.3472 134.4406
2594 30.9980 477(22) 549.6091 134.4250
2595 31.0080 673(26) 759.4269 134.4093
2596 31.0180 905(30) 1010.5854 134.3937
2597 31.0280 1281(36) 1212.7554 134.3781
2598 31.0380 1345(37) 1221.3433 134.3626
2599 31.0480 1147(34) 1010.5068 134.3471
2600 31.0580 820(29) 743.1035 134.3316
2601 31.0580 617(25) 743.1035 134.3316
2602 31.0780 410(20) 406.1606 134.3007
2603 31.0880 345(19) 332.4708 134.2853
2604 31.0980 301(17) 293.7805 134.2699
2605 31.1080 266(16) 271.0146 134.2546
2606 31.1180 226(15) 250.9675 134.2393
2607 31.1280 227(15) 230.0536 134.2240
2608 31.1380 185(14) 212.7149 134.2087
2609 31.1480 187(14) 201.3616 134.1935
2610 31.1580 190(14) 195.7135 134.1783
2611 31.1680 206(14) 193.9359 134.1632
2612 31.1780 192(14) 193.0017 134.1480
2613 31.1880 162(13) 189.0131 134.1329
2614 31.1980 159(13) 180.8636 134.1179
2615 31.2080 160(13) 171.8199 134.1028
2616 31.2180 160(13) 162.7218 134.0879
2617 31.2280 159(13) 157.6810 134.0729
2618 31.2380 149(12) 154.3904 134.0580
2619 31.2480 138(12) 152.0372 134.0431
2620 31.2580 135(12) 150.3642 134.0282
2621 31.2680 156(12) 149.1413 134.0134
2622 31.2780 128(11) 148.2069 133.9986
2623 31.2880 150(12) 147.5023 133.9838
2624 31.2980 165(13) 147.0171 133.9691
2625 31.3080 131(11) 146.7776 133.9544
2626 31.3080 139(12) 146.7776 133.9544
2627 31.3280 128(11) 146.8979 133.9251
2628 31.3380 134(12) 147.8957 133.9105
2629 31.3480 135(12) 149.4113 133.8960
2630 31.3580 154(12) 151.3145 133.8815
2631 31.3680 150(12) 153.4384 133.8670
2632 31.3780 143(12) 155.9729 133.8525
2633 31.3880 122(11) 160.0085 133.8381
2634 31.3980 137(12) 167.5301 133.8238
2635 31.4080 155(12) 180.6872 133.8094
2636 31.4180 168(13) 199.9130 133.7951
2637 31.4280 187(14) 222.0047 133.7809
2638 31.4380 204(14) 238.0456 133.7666
2639 31.4480 209(14) 235.4277 133.7525
2640 31.4580 178(13) 215.0749 133.7383
2641 31.4680 170(13) 191.7817 133.7242
2642 31.4780 192(14) 174.4632 133.7101
2643 31.4880 172(13) 161.3164 133.6961
2644 31.4980 148(12) 156.5160 133.6821
2645 31.5080 132(11) 155.9011 133.6682
2646 31.5180 148(12) 158.2622 133.6543
2647 31.5280 147(12) 162.0198 133.6404
2648 31.5380 145(12) 164.8467 133.6266
2649 31.5480 146(12) 164.3379 133.6128
2650 31.5580 146(12) 159.8604 133.5990
2651 31.5580 146(12) 159.8604 133.5990
2652 31.5780 130(11) 149.0905 133.5717
2653 31.5880 151(12) 146.0408 133.5580
2654 31.5980 152(12) 144.5758 133.5444
2655 31.6080 143(12) 144.4736 133.5309
2656 31.6180 139(12) 145.7462 133.5174
2657 31.6280 146(12) 148.8744 133.5039
2658 31.6380 151(12) 154.3769 133.4905
2659 31.6480 161(13) 163.1533 133.4772
2660 31.6580 182(13) 174.5444 133.4638
2661 31.6680 199(14) 185.7806 133.4505
2662 31.6780 200(14) 190.9428 133.4373
2663 31.6880 197(14) 185.0970 133.4241
2664 31.6980 161(13) 172.4344 133.4109
2665 31.7080 173(13) 160.7500 133.3978
2666 31.7180 158(13) 153.0584 133.3848
2667 31.7280 144(12) 149.2067 133.3717
2668 31.7380 160(13) 148.3233 133.3587
2669 31.7480 162(13) 149.5658 133.3458
2670 31.7580 172(13) 151.9249 133.3329
2671 31.7680 169(13) 154.0535 133.3201
2672 31.7780 148(12) 154.7747 133.3073
2673 31.7880 164(13) 154.8578 133.2945
2674 31.7980 156(12) 158.6450 133.2818
2675 31.8080 173(13) 162.6431 133.2692
2676 31.8180 157(13) 167.9420 133.2566
2677 31.8280 178(13) 172.0579 133.2440
2678 31.8380 157(13) 172.8390 133.2315
2679 31.8480 171(13) 172.2306 133.2190
2680 31.8580 154(12) 174.9779 133.2066
2681 31.8680 159(13) 183.4406 133.1942
2682 31.8780 169(13) 196.4336 133.1819
2683 31.8880 172(13) 208.9089 133.1696
2684 31.8980 153(12) 212.1768 133.1574
2685 31.9080 170(13) 201.4289 133.1452
2686 31.9180 146(12) 184.6533 133.1331
2687 31.9280 169(13) 170.1280 133.1210
2688 31.9380 134(12) 160.1736 133.1090
2689 31.9480 142(12) 154.1017 133.0970
2690 31.9580 134(12) 150.7198 133.0851
2691 31.9680 129(11) 149.0730 133.0732
2692 31.9780 127(11) 148.4648 133.0613
2693 31.9880 148(12) 148.5637 133.0496
2694 31.9980 119(11) 149.3268 133.0378
2695 32.0080 146(12) 150.8661 133.0262
2696 32.0180 139(12) 153.7550 133.0145
2697 32.0280 141(12) 158.7971 133.0030
2698 32.0380 164(13) 167.0605 132.9914
2699 32.0480 160(13) 179.2135 132.9800
2700 32.0580 160(13) 194.4055 132.9686
2701 32.0680 172(13) 209.0245 132.9572
2702 32.0780 209(14) 216.9389 132.9459
2703 32.0880 205(14) 215.2624 132.9346
2704 32.0980 251(16) 206.8859 132.9234
2705 32.1080 205(14) 195.4525 132.9123
2706 32.1180 172(13) 185.4271 132.9012
2707 32.1280 202(14) 179.8596 132.8901
2708 32.1380 164(13) 179.0112 132.8791
2709 32.1480 191(14) 182.5051 132.8682
2710 32.1580 169(13) 189.6098 132.8573
2711 32.1680 210(14) 200.0101 132.8465
2712 32.1780 216(15) 214.2574 132.8357
2713 32.1880 246(16) 235.7197 132.8250
2714 32.1980 240(15) 272.3895 132.8144
2715 32.2080 289(17) 336.4331 132.8038
2716 32.2180 336(18) 441.2739 132.7932
2717 32.2280 470(22) 593.6976 132.7827
2718 32.2380 659(26) 779.1498 132.7723
2719 32.2480 820(29) 943.5348 132.7619
2720 32.2580 1039(32) 991.3154 132.7516
2721 32.2680 1042(32) 872.5878 132.7413
2722 32.2780 780(28) 673.8101 132.7312
2723 32.2880 564(24) 497.3061 132.7210
2724 32.2980 365(19) 373.4994 132.7109
2725 32.3080 306(17) 295.2608 132.7009
2726 32.3180 287(17) 248.5745 132.6909
2727 32.3280 250(16) 221.6451 132.6810
2728 32.3380 226(15) 206.1274 132.6712
2729 32.3480 202(14) 196.9830 132.6614
2730 32.3580 189(14) 191.3063 132.6517
2731 32.3680 160(13) 186.6716 132.6420
2732 32.3780 176(13) 181.6970 132.6324
2733 32.3880 166(13) 176.1649 132.6228
2734 32.3980 182(13) 171.3331 132.6134
2735 32.4080 171(13) 167.9431 132.6039
2736 32.4180 151(12) 165.2394 132.5946
2737 32.4280 165(13) 161.8126 132.5853
2738 32.4380 166(13) 157.4462 132.5760
2739 32.4480 160(13) 153.2996 132.5668
2740 32.4580 158(13) 150.0911 132.5577
2741 32.4680 135(12) 147.8379 132.5487
2742 32.4780 136(12) 146.3550 132.5397
2743 32.4880 154(12) 145.4863 132.5308
2744 32.4980 157(13) 145.1110 132.5219
2745 32.5080 141(12) 145.1031 132.5131
2746 32.5180 133(12) 146.1424 132.5044
2747 32.5280 139(12) 145.9649 132.4957
2748 32.5380 141(12) 145.1551 132.4871
2749 32.5480 108(10) 146.5838 132.4785
2750 32.5580 147(12) 145.8471 132.4701
2751 32.5680 131(11) 145.5259 132.4617
2752 32.5780 134(12) 145.5568 132.4533
2753 32.5880 129(11) 145.9388 132.4450
2754 32.5980 121(11) 146.7139 132.4368
2755 32.6080 125(11) 148.0305 132.4286
2756 32.6180 136(12) 150.1881 132.4206
2757 32.6280 121(11) 153.7079 132.4126
2758 32.6380 141(12) 159.3569 132.4046
2759 32.6480 153(12) 168.1698 132.3967
2760 32.6580 171(13) 180.8972 132.3889
2761 32.6680 162(13) 197.1823 132.3811
2762 32.6780 175(13) 214.8352 132.3735
2763 32.6880 213(15) 228.8061 132.3658
2764 32.6980 205(14) 231.1713 132.3583
2765 32.7080 180(13) 218.1496 132.3508
2766 32.7180 185(14) 197.9998 132.3434
2767 32.7280 180(13) 180.4778 132.3361
2768 32.7380 176(13) 166.6839 132.3288
2769 32.7480 161(13) 160.0433 132.3216
2770 32.7580 142(12) 156.9992 132.3145
2771 32.7680 174(13) 156.4639 132.3074
2772 32.7780 165(13) 157.8333 132.3004
2773 32.7880 160(13) 160.8674 132.2935
2774 32.7980 174(13) 165.4518 132.2866
2775 32.8080 158(13) 171.2504 132.2799
2776 32.8180 163(13) 177.4621 132.2731
2777 32.8280 194(14) 183.2796 132.2665
2778 32.8380 180(13) 187.8872 132.2599
2779 32.8480 175(13) 189.7219 132.2535
2780 32.8580 202(14) 188.1885 132.2470
2781 32.8680 183(14) 185.6439 132.2407
2782 32.8780 163(13) 184.9068 132.2344
2783 32.8880 181(13) 187.2078 132.2282
2784 32.8980 190(14) 192.9754 132.2221
2785 32.9080 177(13) 202.7315 132.2160
2786 32.9180 217(15) 217.8685 132.2101
2787 32.9280 228(15) 241.5131 132.2041
2788 32.9380 275(17) 278.6047 132.1983
2789 32.9480 314(18) 337.2776 132.1926
2790 32.9580 417(20) 427.2849 132.1869
2791 32.9680 497(22) 556.6436 132.1812
2792 32.9780 648(25) 725.9747 132.1757
2793 32.9880 830(29) 917.6984 132.1703
2794 32.9980 958(31) 1092.6880 132.1649
2795 33.0080 1086(33) 1219.6526 132.1596
2796 33.0180 1127(34) 1270.2101 132.1543
2797 33.0280 1178(34) 1184.2885 132.1492
2798 33.0380 968(31) 968.4372 132.1441
2799 33.0480 761(28) 728.3385 132.1391
2800 33.0580 598(24) 538.0821 132.1342
2801 33.0680 440(21) 408.2458 132.1293
2802 33.0780 366(19) 325.6756 132.1246
2803 33.0880 291(17) 274.7375 132.1199
2804 33.0980 281(17) 243.2711 132.1152
2805 33.1080 262(16) 223.2223 132.1107
2806 33.1180 229(15) 210.1165 132.1063
2807 33.1280 233(15) 201.8482 132.1019
2808 33.1380 192(14) 197.5882 132.0976
2809 33.1480 201(14) 196.8144 132.0934
2810 33.1580 206(14) 198.3380 132.0892
2811 33.1680 176(13) 199.4922 132.0852
2812 33.1780 242(16) 197.4338 132.0812
2813 33.1880 182(13) 190.1353 132.0773
2814 33.1980 211(15) 179.7161 132.0735
2815 33.2080 169(13) 170.0459 132.0697
2816 33.2180 165(13) 162.7385 132.0661
2817 33.2280 166(13) 157.7193 132.0625
2818 33.2380 155(12) 154.7654 132.0590
2819 33.2480 156(12) 152.4964 132.0556
2820 33.2580 133(12) 150.9461 132.0523
2821 33.2680 168(13) 149.8777 132.0490
2822 33.2780 154(12) 149.1826 132.0459
2823 33.2880 154(12) 148.8261 132.0428
2824 33.2980 142(12) 148.8999 132.0398
2825 33.3080 157(13) 149.5495 132.0369
2826 33.3180 155(12) 151.0193 132.0341
2827 33.3280 158(13) 153.9418 132.0313
2828 33.3380 176(13) 159.1826 132.0286
2829 33.3480 185(14) 167.8134 132.0261
2830 33.3580 208(14) 180.7473 132.0236
2831 33.3680 213(15) 196.6692 132.0212
2832 33.3780 237(15) 211.8770 132.0188
2833 33.3880 253(16) 218.9033 132.0166
2834 33.3980 251(16) 212.0917 132.0145
2835 33.4080 234(15) 196.6594 132.0124
2836 33.4180 212(15) 181.9741 132.0104
2837 33.4280 193(14) 171.7791 132.0085
2838 33.4380 178(13) 165.8035 132.0067
2839 33.4480 160(13) 162.4299 132.0050
2840 33.4580 173(13) 159.6165 132.0034
2841 33.4680 155(12) 156.4902 132.0018
2842 33.4780 164(13) 154.0578 132.0004
2843 33.4880 153(12) 152.1790 131.9990
2844 33.4980 174(13) 152.6931 131.9977
2845 33.5080 167(13) 153.8121 131.9965
2846 33.5180 149(12) 152.1301 131.9954
2847 33.5280 168(13) 151.6709 131.9944
2848 33.5380 166(13) 150.9866 131.9935
2849 33.5480 129(11) 150.9208 131.9926
2850 33.5580 164(13) 151.1645 131.9919
2851 33.5680 137(12) 150.7747 131.9912
2852 33.5780 142(12) 149.3230 131.9907
2853 33.5880 141(12) 147.5615 131.9902
2854 33.5980 143(12) 146.4485 131.9898
2855 33.6080 141(12) 146.3594 131.9895
2856 33.6180 147(12) 147.3984 131.9893
2857 33.6280 152(12) 149.7482 131.9892
2858 33.6380 183(14) 153.8254 131.9892
2859 33.6480 182(13) 160.3073 131.9893
2860 33.6580 163(13) 170.0746 131.9894
2861 33.6680 150(12) 184.2839 131.9897
2862 33.6780 175(13) 203.6899 131.9900
2863 33.6880 217(15) 228.6588 131.9905
2864 33.6980 238(15) 258.6927 131.9910
2865 33.7080 258(16) 291.7816 131.9916
2866 33.7180 326(18) 316.7481 131.9924
2867 33.7280 385(20) 320.4759 131.9932
2868 33.7380 303(17) 296.3749 131.9941
2869 33.7480 286(17) 258.9864 131.9951
2870 33.7580 247(16) 225.8323 131.9962
2871 33.7680 210(14) 205.8780 131.9974
2872 33.7780 185(14) 195.3874 131.9987
2873 33.7880 201(14) 195.6447 132.0001
2874 33.7980 197(14) 205.5137 132.0015
2875 33.8080 195(14) 222.2929 132.0031
2876 33.8180 210(14) 240.1879 132.0048
2877 33.8280 220(15) 249.3599 132.0066
2878 33.8380 248(16) 241.5926 132.0084
2879 33.8480 227(15) 220.0952 132.0104
2880 33.8580 203(14) 197.7354 132.0125
2881 33.8680 182(13) 180.9053 132.0146
2882 33.8780 155(12) 170.7256 132.0169
2883 33.8880 139(12) 165.3361 132.0192
2884 33.8980 176(13) 163.2127 132.0217
2885 33.9080 171(13) 163.0683 132.0242
2886 33.9180 177(13) 164.3247 132.0269
2887 33.9280 171(13) 167.1392 132.0296
2888 33.9380 177(13) 171.3295 132.0325
2889 33.9480 160(13) 175.1643 132.0354
2890 33.9580 181(13) 176.3610 132.0385
2891 33.9680 179(13) 173.7844 132.0416
2892 33.9780 170(13) 168.9388 132.0449
2893 33.9880 182(13) 164.1674 132.0482
2894 33.9880 152(12) 164.1674 132.0482
2895 34.0080 149(12) 158.9418 132.0552
2896 34.0180 146(12) 158.4668 132.0589
2897 34.0280 166(13) 158.9804 132.0626
2898 34.0380 128(11) 160.2351 132.0665
2899 34.0480 134(12) 162.0935 132.0704
2900 34.0580 149(12) 164.5712 132.0745
2901 34.0680 185(14) 167.7366 132.0786
2902 34.0780 169(13) 171.7677 132.0829
2903 34.0880 185(14) 176.9329 132.0873
2904 34.0980 188(14) 183.5599 132.0918
2905 34.1080 195(14) 192.0545 132.0963
2906 34.1180 211(15) 203.8590 132.1010
2907 34.1280 239(15) 218.3853 132.1058
2908 34.1380 226(15) 239.0808 132.1107
2909 34.1480 273(17) 271.1306 132.1156
2910 34.1580 285(17) 321.6050 132.1207
2911 34.1680 338(18) 397.3010 132.1259
2912 34.1780 407(20) 500.5688 132.1312
2913 34.1880 515(23) 623.5662 132.1367
2914 34.1980 653(26) 742.1122 132.1422
2915 34.2080 828(29) 817.4246 132.1478
2916 34.2180 918(30) 833.5956 132.1535
2917 34.2280 850(29) 835.5428 132.1593
2918 34.2380 870(29) 876.7128 132.1653
2919 34.2380 942(31) 876.7128 132.1653
2920 34.2580 1085(33) 1071.6506 132.1775
2921 34.2680 1219(35) 1129.9207 132.1838
2922 34.2780 1174(34) 1078.0143 132.1901
2923 34.2880 966(31) 923.7812 132.1966
2924 34.2980 733(27) 751.2398 132.2032
2925 34.3080 604(25) 623.2693 132.2099
2926 34.3180 546(23) 553.0317 132.2167
2927 34.3280 509(23) 528.7245 132.2236
2928 34.3380 519(23) 525.2351 132.2306
2929 34.3480 520(23) 512.3134 132.2377
2930 34.3580 449(21) 473.6320 132.2450
2931 34.3680 460(21) 417.2675 132.2523
2932 34.3780 398(20) 358.7093 132.2598
2933 34.3880 303(17) 309.8718 132.2674
2934 34.3980 283(17) 276.0170 132.2751
2935 34.4080 226(15) 256.8529 132.2829
2936 34.4180 254(16) 249.3469 132.2908
2937 34.4280 253(16) 248.8023 132.2988
2938 34.4380 244(16) 249.0132 132.3069
2939 34.4480 230(15) 244.0503 132.3151
2940 34.4580 245(16) 232.9746 132.3235
2941 34.4680 218(15) 219.7581 132.3320
2942 34.4780 194(14) 207.0639 132.3405
2943 34.4880 201(14) 196.2323 132.3492
2944 34.4980 184(14) 188.3014 132.3580
2945 34.5080 196(14) 183.4618 132.3669
2946 34.5180 195(14) 181.3440 132.3760
2947 34.5280 192(14) 183.0182 132.3851
2948 34.5380 202(14) 185.7421 132.3944
2949 34.5480 175(13) 191.7007 132.4037
2950 34.5580 176(13) 202.0595 132.4132
2951 34.5680 181(13) 219.8574 132.4228
2952 34.5780 221(15) 249.1459 132.4325
2953 34.5880 251(16) 294.0182 132.4424
2954 34.5980 285(17) 355.6652 132.4523
2955 34.6080 313(18) 428.4053 132.4624
2956 34.6180 385(20) 495.0745 132.4726
2957 34.6280 519(23) 525.9163 132.4829
2958 34.6380 530(23) 498.9430 132.4933
2959 34.6480 415(20) 431.2759 132.5038
2960 34.6580 379(19) 359.1436 132.5145
2961 34.6680 281(17) 302.4156 132.5252
2962 34.6780 258(16) 264.8468 132.5361
2963 34.6880 234(15) 245.2962 132.5471
2964 34.6980 241(16) 240.1095 132.5582
2965 34.7080 237(15) 249.5302 132.5695
2966 34.7180 265(16) 274.4357 132.5808
2967 34.7280 258(16) 314.5225 132.5923
2968 34.7380 297(17) 370.2363 132.6039
2969 34.7480 346(19) 431.3969 132.6156
2970 34.7580 388(20) 478.9052 132.6274
2971 34.7680 416(20) 486.3175 132.6394
2972 34.7780 392(20) 446.7268 132.6514
2973 34.7880 301(17) 385.6490 132.6636
2974 34.7980 302(17) 327.0773 132.6759
2975 34.8080 271(16) 282.8141 132.6884
2976 34.8180 264(16) 250.2667 132.7009
2977 34.8280 236(15) 226.3976 132.7136
2978 34.8380 218(15) 208.6736 132.7264
2979 34.8480 213(15) 195.9215 132.7393
2980 34.8580 194(14) 187.3922 132.7524
2981 34.8680 207(14) 182.0448 132.7655
2982 34.8780 208(14) 180.2371 132.7788
2983 34.8880 190(14) 181.3024 132.7922
2984 34.8980 217(15) 185.4600 132.8058
2985 34.9080 190(14) 192.9577 132.8194
2986 34.9180 195(14) 203.4276 132.8332
2987 34.9280 239(15) 215.2048 132.8471
2988 34.9380 257(16) 225.0009 132.8611
2989 34.9480 263(16) 229.2944 132.8753
2990 34.9580 270(16) 229.3220 132.8896
2991 34.9680 243(16) 231.5213 132.9039
2992 34.9780 247(16) 242.8456 132.9185
2993 34.9880 258(16) 268.8687 132.9331
2994 34.9980 293(17) 316.0424 132.9479
2995 35.0080 343(19) 390.5929 132.9628
2996 35.0180 379(19) 494.3353 132.9778
2997 35.0280 442(21) 618.0742 132.9930
2998 35.0380 611(25) 734.7209 133.0083
2999 35.0480 719(27) 799.2686 133.0237
3000 35.0580 766(28) 772.1287 133.0392
3001 35.0680 695(26) 664.6551 133.0549
3002 35.0780 506(22) 533.9185 133.0707
3003 35.0880 422(21) 422.7072 133.0866
3004 35.0980 329(18) 342.5497 133.1026
3005 35.1080 267(16) 289.6187 133.1188
3006 35.1180 263(16) 256.8456 133.1351
3007 35.1280 238(15) 238.7248 133.1515
3008 35.1380 223(15) 231.9285 133.1681
3009 35.1480 228(15) 235.4897 133.1848
3010 35.1580 234(15) 249.6204 133.2016
3011 35.1680 239(15) 278.4818 133.2185
3012 35.1780 276(17) 322.9500 133.2356
3013 35.1880 298(17) 380.8436 133.2528
3014 35.1980 417(20) 442.4774 133.2702
3015 35.2080 464(22) 487.8380 133.2876
3016 35.2180 556(24) 491.5258 133.3052
3017 35.2280 505(22) 447.4891 133.3230
3018 35.2380 354(19) 381.4373 133.3408
3019 35.2480 332(18) 322.3162 133.3588
3020 35.2580 258(16) 280.1022 133.3769
3021 35.2680 222(15) 256.7634 133.3952
3022 35.2780 219(15) 250.0550 133.4136
3023 35.2880 209(14) 256.5366 133.4321
3024 35.2980 214(15) 270.7718 133.4507
3025 35.3080 248(16) 287.9017 133.4695
3026 35.3180 235(15) 297.7042 133.4885
3027 35.3280 243(16) 291.2120 133.5075
3028 35.3380 248(16) 269.9702 133.5267
3029 35.3480 227(15) 244.9214 133.5460
3030 35.3580 210(14) 223.4355 133.5655
3031 35.3680 241(16) 206.7834 133.5851
3032 35.3780 172(13) 194.3004 133.6048
3033 35.3880 181(13) 185.2852 133.6246
3034 35.3980 170(13) 178.4525 133.6446
3035 35.4080 191(14) 173.0045 133.6648
3036 35.4180 167(13) 168.4205 133.6850
3037 35.4280 177(13) 164.3594 133.7054
3038 35.4380 162(13) 160.9720 133.7260
3039 35.4480 170(13) 158.2066 133.7467
3040 35.4580 161(13) 155.9063 133.7675
3041 35.4680 132(11) 153.6319 133.7884
3042 35.4780 165(13) 151.4766 133.8095
3043 35.4880 167(13) 149.7090 133.8307
3044 35.4980 154(12) 148.4129 133.8521
3045 35.5080 154(12) 147.5422 133.8736
3046 35.5180 130(11) 147.0257 133.8952
3047 35.5280 152(12) 146.7934 133.9170
3048 35.5380 164(13) 146.8451 133.9389
3049 35.5480 175(13) 147.0385 133.9610
3050 35.5580 178(13) 147.8877 133.9831
3051 35.5680 162(13) 149.3560 134.0055
3052 35.5780 172(13) 151.5093 134.0279
3053 35.5880 155(12) 152.9495 134.0506
3054 35.5980 173(13) 156.1541 134.0733
3055 35.6080 154(12) 158.9182 134.0962
3056 35.6180 184(14) 160.3528 134.1192
3057 35.6280 189(14) 160.5175 134.1424
3058 35.6380 160(13) 160.4759 134.1657
3059 35.6480 172(13) 160.9068 134.1892
3060 35.6580 148(12) 161.6788 134.2128
3061 35.6680 170(13) 162.5970 134.2365
3062 35.6780 186(14) 164.0201 134.2604
3063 35.6880 176(13) 166.8165 134.2844
3064 35.6980 182(13) 172.0894 134.3085
3065 35.7080 184(14) 181.3308 134.3329
3066 35.7180 174(13) 196.8053 134.3573
3067 35.7280 210(14) 221.8727 134.3819
3068 35.7380 220(15) 259.9369 134.4066
3069 35.7480 254(16) 312.7473 134.4315
3070 35.7580 350(19) 376.5978 134.4565
3071 35.7680 403(20) 442.0534 134.4817
3072 35.7780 523(23) 486.8621 134.5070
3073 35.7880 524(23) 486.0960 134.5324
3074 35.7980 430(21) 437.5625 134.5580
3075 35.8080 379(19) 368.7228 134.5838
3076 35.8180 365(19) 305.8606 134.6097
3077 35.8280 280(17) 259.0145 134.6357
3078 35.8380 247(16) 228.4090 134.6619
3079 35.8480 229(15) 210.9596 134.6882
3080 35.8580 219(15) 202.8606 134.7147
3081 35.8680 235(15) 199.7752 134.7413
3082 35.8780 227(15) 198.3617 134.7681
3083 35.8880 230(15) 195.9437 134.7950
3084 35.8980 207(14) 191.0928 134.8220
3085 35.9080 229(15) 183.2724 134.8492
3086 35.9180 205(14) 173.9527 134.8766
3087 35.9280 180(13) 165.4410 134.9041
3088 35.9380 168(13) 159.0414 134.9317
3089 35.9480 174(13) 154.5887 134.9595
3090 35.9580 163(13) 151.7337 134.9875
3091 35.9680 150(12) 149.9905 135.0156
3092 35.9780 178(13) 148.9445 135.0438
3093 35.9880 169(13) 148.4168 135.0722
3094 35.9980 146(12) 148.3040 135.1008
3095 36.0080 146(12) 148.7408 135.1294
3096 36.0180 177(13) 149.7964 135.1583
3097 36.0280 165(13) 151.3243 135.1873
3098 36.0380 176(13) 153.2496 135.2164
3099 36.0480 171(13) 155.6244 135.2457
3100 36.0580 187(14) 158.4044 135.2751
3101 36.0680 179(13) 160.8549 135.3047
3102 36.0780 194(14) 161.5824 135.3345
3103 36.0880 203(14) 159.7201 135.3644
3104 36.0980 162(13) 156.1413 135.3944
3105 36.1080 170(13) 152.2589 135.4246
3106 36.1180 161(13) 148.8481 135.4550
3107 36.1280 176(13) 148.4224 135.4855
3108 36.1380 150(12) 146.5005 135.5161
3109 36.1480 172(13) 145.2695 135.5470
3110 36.1580 166(13) 144.5705 135.5779
3111 36.1680 170(13) 144.2080 135.6090
3112 36.1780 153(12) 144.1167 135.6403
3113 36.1880 148(12) 144.1749 135.6717
3114 36.1980 150(12) 144.4106 135.7033
3115 36.2080 163(13) 144.8404 135.7350
3116 36.2180 158(13) 145.5393 135.7669
3117 36.2280 136(12) 146.6160 135.7990
3118 36.2380 143(12) 148.1726 135.8312
3119 36.2480 156(12) 150.2521 135.8635
3120 36.2580 155(12) 152.6677 135.8960
3121 36.2680 156(12) 155.0507 135.9287
3122 36.2780 169(13) 156.8263 135.9615
3123 36.2880 164(13) 157.7615 135.9945
3124 36.2980 181(13) 158.5940 136.0276
3125 36.3080 179(13) 160.4448 136.0609
3126 36.3180 173(13) 163.9010 136.0943
3127 36.3280 198(14) 168.8954 136.1279
3128 36.3380 193(14) 174.0448 136.1617
3129 36.3480 223(15) 181.4742 136.1956
3130 36.3580 200(14) 187.4778 136.2297
3131 36.3680 245(16) 193.6151 136.2639
3132 36.3780 244(16) 200.6288 136.2983
3133 36.3880 258(16) 207.6693 136.3328
3134 36.3980 264(16) 212.3522 136.3675
3135 36.4080 238(15) 213.2002 136.4024
3136 36.4180 269(16) 210.7667 136.4374
3137 36.4280 248(16) 207.7093 136.4726
3138 36.4380 249(16) 206.7963 136.5079
3139 36.4480 223(15) 208.3971 136.5434
3140 36.4580 251(16) 210.3053 136.5791
3141 36.4680 195(14) 209.6050 136.6149
3142 36.4780 252(16) 206.5280 136.6509
3143 36.4780 215(15) 206.5280 136.6509
3144 36.4980 232(15) 202.7906 136.7234
3145 36.5080 228(15) 203.2370 136.7598
3146 36.5180 245(16) 203.4396 136.7964
3147 36.5280 210(14) 203.1937 136.8332
3148 36.5380 239(15) 202.8595 136.8702
3149 36.5480 221(15) 202.3880 136.9073
3150 36.5580 231(15) 202.5832 136.9445
3151 36.5680 236(15) 205.1950 136.9820
3152 36.5780 220(15) 211.5908 137.0196
3153 36.5880 208(14) 222.6778 137.0573
3154 36.5980 269(16) 239.4381 137.0953
3155 36.6080 261(16) 263.4485 137.1333
3156 36.6180 302(17) 297.8885 137.1716
3157 36.6280 302(17) 348.5847 137.2100
3158 36.6380 357(19) 425.1158 137.2486
3159 36.6480 412(20) 537.1628 137.2873
3160 36.6580 551(23) 687.3583 137.3262
3161 36.6680 710(27) 863.8661 137.3653
3162 36.6780 971(31) 1033.8691 137.4045
3163 36.6880 1190(34) 1139.5126 137.4439
3164 36.6980 1328(36) 1121.6855 137.4835
3165 36.7080 1159(34) 983.3208 137.5232
3166 36.7180 887(30) 795.1875 137.5631
3167 36.7280 664(26) 621.3838 137.6032
3168 36.7380 516(23) 487.0927 137.6434
3169 36.7480 452(21) 392.0893 137.6838
3170 36.7580 372(19) 329.0157 137.7243
3171 36.7680 330(18) 288.6488 137.7651
3172 36.7780 245(16) 262.9962 137.8060
3173 36.7880 249(16) 246.6413 137.8470
3174 36.7980 223(15) 236.5316 137.8883
3175 36.8080 212(15) 230.9541 137.9297
3176 36.8180 219(15) 229.1664 137.9712
3177 36.8280 227(15) 231.5055 138.0130
3178 36.8380 232(15) 239.7043 138.0549
3179 36.8480 228(15) 256.8158 138.0969
3180 36.8580 240(15) 287.6541 138.1391
3181 36.8680 266(16) 335.0413 138.1816
3182 36.8780 308(18) 401.9764 138.2241
3183 36.8880 382(20) 485.5317 138.2669
3184 36.8980 467(22) 574.0085 138.3098
3185 36.9080 543(23) 643.5311 138.3529
3186 36.9180 631(25) 661.9860 138.3961
3187 36.9280 672(26) 614.7765 138.4395
3188 36.9380 592(24) 525.9465 138.4831
3189 36.9480 452(21) 432.9683 138.5269
3190 36.9580 342(18) 356.3760 138.5708
3191 36.9680 292(17) 300.8951 138.6149
3192 36.9780 245(16) 264.5457 138.6592
3193 36.9880 212(15) 243.9239 138.7037
3194 36.9980 227(15) 235.6411 138.7483
3195 37.0080 201(14) 236.9278 138.7931
3196 37.0180 224(15) 244.6173 138.8380
3197 37.0280 269(16) 254.8792 138.8832
3198 37.0380 238(15) 262.3224 138.9285
3199 37.0480 255(16) 260.9512 138.9740
3200 37.0580 225(15) 249.0134 139.0196
3201 37.0680 221(15) 231.4446 139.0655
3202 37.0780 203(14) 214.5997 139.1115
3203 37.0880 186(14) 201.7478 139.1577
3204 37.0980 191(14) 193.5068 139.2040
3205 37.1080 192(14) 188.9688 139.2505
3206 37.1180 213(15) 187.0133 139.2972
3207 37.1280 184(14) 186.1947 139.3441
3208 37.1380 217(15) 185.2713 139.3911
3209 37.1480 174(13) 184.3610 139.4383
3210 37.1580 193(14) 184.3949 139.4857
3211 37.1680 205(14) 185.7633 139.5333
3212 37.1780 183(14) 187.5682 139.5811
3213 37.1880 176(13) 188.1905 139.6290
3214 37.1980 213(15) 186.4907 139.6771
3215 37.2080 173(13) 183.3649 139.7254
3216 37.2180 209(14) 180.6974 139.7738
3217 37.2280 177(13) 180.0432 139.8224
3218 37.2380 201(14) 182.3341 139.8712
3219 37.2480 183(14) 188.4680 139.9202
3220 37.2580 181(13) 199.3420 139.9694
3221 37.2680 173(13) 213.4102 140.0187
3222 37.2780 205(14) 235.1275 140.0682
3223 37.2880 238(15) 260.1308 140.1179
3224 37.2980 235(15) 283.7293 140.1678
3225 37.3080 253(16) 298.2129 140.2178
3226 37.3180 274(17) 296.7128 140.2681
3227 37.3280 276(17) 280.9008 140.3185
3228 37.3380 229(15) 260.5634 140.3691
3229 37.3480 244(16) 244.4311 140.4198
3230 37.3580 237(15) 236.7352 140.4707
3231 37.3680 216(15) 239.5106 140.5219
3232 37.3780 237(15) 253.8708 140.5732
3233 37.3880 254(16) 281.2314 140.6247
3234 37.3980 302(17) 322.1971 140.6763
3235 37.4080 280(17) 375.4789 140.7282
3236 37.4180 394(20) 435.6709 140.7802
3237 37.4280 502(22) 490.6100 140.8324
3238 37.4380 521(23) 521.7660 140.8848
3239 37.4480 560(24) 515.3840 140.9373
3240 37.4580 489(22) 477.5345 140.9901
3241 37.4680 487(22) 425.4866 141.0430
3242 37.4780 483(22) 370.2531 141.0961
3243 37.4880 415(20) 317.8895 141.1494
3244 37.4980 403(20) 272.3094 141.2029
3245 37.5080 296(17) 238.6803 141.2565
3246 37.5180 270(16) 215.4559 141.3103
3247 37.5280 241(16) 200.5338 141.3644
3248 37.5380 232(15) 191.4285 141.4186
3249 37.5480 214(15) 185.9346 141.4730
3250 37.5580 188(14) 182.5167 141.5275
3251 37.5680 207(14) 180.4794 141.5823
3252 37.5780 181(13) 179.8469 141.6372
3253 37.5880 187(14) 181.1461 141.6923
3254 37.5980 220(15) 184.9552 141.7476
3255 37.6080 203(14) 191.1450 141.8031
3256 37.6180 208(14) 198.5273 141.8588
3257 37.6280 214(15) 204.4409 141.9146
3258 37.6380 211(15) 206.1364 141.9707
3259 37.6480 208(14) 202.2706 142.0269
3260 37.6580 174(13) 195.7366 142.0833
3261 37.6680 211(15) 190.1572 142.1399
3262 37.6780 183(14) 186.7136 142.1967
3263 37.6880 182(13) 185.2601 142.2537
3264 37.6980 192(14) 185.0616 142.3108
3265 37.7080 170(13) 185.2828 142.3682
3266 37.7180 196(14) 185.0901 142.4257
3267 37.7280 187(14) 184.3586 142.4834
3268 37.7380 177(13) 183.2457 142.5413
3269 37.7480 205(14) 181.2066 142.5994
3270 37.7580 179(13) 177.3424 142.6577
3271 37.7680 172(13) 171.9142 142.7161
3272 37.7780 184(14) 166.3309 142.7748
3273 37.7880 164(13) 161.7138 142.8336
3274 37.7980 171(13) 159.2844 142.8926
3275 37.8080 155(12) 157.1634 142.9518
3276 37.8180 174(13) 157.1831 143.0112
3277 37.8280 170(13) 156.7395 143.0708
3278 37.8380 171(13) 156.7787 143.1306
3279 37.8480 158(13) 157.1928 143.1906
3280 37.8580 149(12) 157.9588 143.2507
3281 37.8680 150(12) 159.2126 143.3111
3282 37.8780 158(13) 161.2582 143.3716
3283 37.8880 182(13) 164.5172 143.4323
3284 37.8980 138(12) 169.5063 143.4933
3285 37.9080 165(13) 176.4581 143.5544
3286 37.9180 155(12) 186.3639 143.6157
3287 37.9280 184(14) 198.6496 143.6771
3288 37.9380 165(13) 211.8930 143.7388
3289 37.9480 203(14) 223.0538 143.8007
3290 37.9580 206(14) 228.2968 143.8627
3291 37.9680 187(14) 225.0458 143.9250
3292 37.9780 207(14) 214.4822 143.9874
3293 37.9880 242(16) 200.8771 144.0501
3294 37.9980 146(12) 188.1105 144.1129
3295 38.0080 167(13) 177.9741 144.1759
3296 38.0180 175(13) 170.6529 144.2391
3297 38.0280 176(13) 165.5674 144.3025
3298 38.0380 171(13) 161.6700 144.3661
3299 38.0480 168(13) 159.8181 144.4299
3300 38.0580 163(13) 158.9615 144.4939
3301 38.0680 141(12) 158.4960 144.5581
3302 38.0780 145(12) 158.3942 144.6224
3303 38.0880 146(12) 158.5632 144.6870
3304 38.0980 154(12) 158.9715 144.7517
3305 38.1080 179(13) 159.6270 144.8167
3306 38.1180 162(13) 160.5997 144.8818
3307 38.1280 170(13) 161.9865 144.9471
3308 38.1380 164(13) 164.8069 145.0127
3309 38.1480 166(13) 167.7524 145.0784
3310 38.1580 177(13) 171.9782 145.1443
3311 38.1680 166(13) 177.8602 145.2104
3312 38.1780 197(14) 185.5998 145.2767
3313 38.1880 189(14) 194.9232 145.3432
3314 38.1980 212(15) 204.7209 145.4099
3315 38.2080 244(16) 213.5782 145.4768
3316 38.2180 244(16) 219.3588 145.5439
3317 38.2280 267(16) 220.1340 145.6112
3318 38.2380 255(16) 215.8563 145.6787
3319 38.2480 220(15) 209.3951 145.7464
3320 38.2580 237(15) 204.0729 145.8142
3321 38.2680 195(14) 201.5444 145.8823
3322 38.2780 220(15) 202.3107 145.9506
3323 38.2880 198(14) 206.5702 146.0190
3324 38.2980 197(14) 214.7670 146.0877
3325 38.3080 212(15) 227.8595 146.1566
3326 38.3180 250(16) 247.8958 146.2256
3327 38.3280 263(16) 277.8260 146.2949
3328 38.3380 309(18) 321.6896 146.3643
3329 38.3480 359(19) 383.8875 146.4340
3330 38.3580 419(20) 467.9395 146.5038
3331 38.3680 456(21) 574.5458 146.5739
3332 38.3780 646(25) 697.8689 146.6441
3333 38.3880 746(27) 821.6060 146.7146
3334 38.3980 940(31) 918.9787 146.7852
3335 38.4080 1031(32) 966.2064 146.8561
3336 38.4180 1076(33) 953.3253 146.9271
3337 38.4280 1135(34) 878.6151 146.9983
3338 38.4380 1014(32) 757.7260 147.0698
3339 38.4480 811(28) 623.8053 147.1414
3340 38.4580 636(25) 504.8359 147.2133
3341 38.4680 471(22) 411.9813 147.2853
3342 38.4780 407(20) 344.7955 147.3576
3343 38.4880 350(19) 298.4836 147.4300
3344 38.4980 343(19) 267.2361 147.5027
3345 38.5080 307(18) 245.9178 147.5755
3346 38.5180 249(16) 230.8676 147.6485
3347 38.5280 219(15) 220.1028 147.7218
3348 38.5380 220(15) 212.4788 147.7952
3349 38.5480 210(14) 207.2231 147.8689
3350 38.5580 212(15) 203.6817 147.9427
3351 38.5680 191(14) 201.2168 148.0168
3352 38.5780 192(14) 199.8064 148.0911
3353 38.5880 209(14) 199.4110 148.1655
3354 38.5980 180(13) 200.6540 148.2402
3355 38.6080 201(14) 204.3139 148.3150
3356 38.6180 210(14) 211.1398 148.3901
3357 38.6280 204(14) 222.1286 148.4654
3358 38.6380 211(15) 236.8442 148.5409
3359 38.6480 221(15) 255.4392 148.6165
3360 38.6580 222(15) 276.8740 148.6924
3361 38.6680 227(15) 299.1356 148.7685
3362 38.6780 273(17) 320.7801 148.8448
3363 38.6880 287(17) 343.2453 148.9213
3364 38.6980 297(17) 369.5440 148.9980
3365 38.7080 342(18) 400.3362 149.0749
3366 38.7180 349(19) 433.6576 149.1520
3367 38.7280 390(20) 465.3506 149.2293
3368 38.7380 432(21) 485.7439 149.3068
3369 38.7480 446(21) 481.3601 149.3846
3370 38.7580 445(21) 447.4040 149.4625
3371 38.7680 424(21) 395.6732 149.5406
3372 38.7780 358(19) 342.9013 149.6189
3373 38.7880 295(17) 298.6603 149.6975
3374 38.7980 262(16) 265.1140 149.7762
3375 38.8080 220(15) 241.0666 149.8552
3376 38.8180 214(15) 223.8720 149.9343
3377 38.8280 218(15) 211.2336 150.0137
3378 38.8380 231(15) 201.7467 150.0933
3379 38.8480 202(14) 194.8109 150.1730
3380 38.8580 202(14) 190.0905 150.2530
3381 38.8680 174(13) 187.2358 150.3332
3382 38.8780 174(13) 186.1286 150.4136
3383 38.8880 182(13) 187.3139 150.4942
3384 38.8980 199(14) 189.7958 150.5750
3385 38.9080 186(14) 194.0533 150.6561
3386 38.9180 205(14) 199.7526 150.7373
3387 38.9280 200(14) 206.0780 150.8187
3388 38.9380 198(14) 211.8106 150.9004
3389 38.9480 210(14) 215.8882 150.9822
3390 38.9580 212(15) 219.0578 151.0643
3391 38.9680 223(15) 223.7288 151.1465
3392 38.9780 227(15) 232.2720 151.2290
3393 38.9880 248(16) 245.8149 151.3117
3394 38.9980 221(15) 264.3850 151.3946
3395 39.0080 262(16) 286.9563 151.4777
3396 39.0180 246(16) 310.1367 151.5610
3397 39.0280 292(17) 330.6180 151.6446
3398 39.0380 328(18) 339.0117 151.7283
3399 39.0480 309(18) 331.9354 151.8123
3400 39.0580 317(18) 310.3229 151.8964
3401 39.0680 271(16) 283.0564 151.9808
3402 39.0780 267(16) 257.6700 152.0653
3403 39.0880 235(15) 237.1339 152.1501
3404 39.0980 212(15) 221.5036 152.2351
3405 39.1080 210(14) 210.0721 152.3203
3406 39.1180 205(14) 202.3085 152.4057
3407 39.1280 193(14) 197.5630 152.4913
3408 39.1380 162(13) 195.0307 152.5772
3409 39.1480 175(13) 194.0705 152.6632
3410 39.1580 190(14) 194.3711 152.7495
3411 39.1680 170(13) 196.1940 152.8360
3412 39.1780 189(14) 200.6364 152.9227
3413 39.1880 172(13) 209.1286 153.0096
3414 39.1980 190(14) 222.9330 153.0967
3415 39.2080 204(14) 242.6371 153.1840
3416 39.2180 223(15) 267.6267 153.2715
3417 39.2280 266(16) 295.3801 153.3593
3418 39.2380 283(17) 320.8625 153.4472
3419 39.2480 321(18) 336.6237 153.5354
3420 39.2580 323(18) 335.5299 153.6238
3421 39.2680 373(19) 317.2679 153.7124
3422 39.2780 308(18) 289.9296 153.8012
3423 39.2880 245(16) 262.5310 153.8902
3424 39.2980 252(16) 239.8599 153.9794
3425 39.3080 216(15) 223.0627 154.0689
3426 39.3180 210(14) 211.0070 154.1586
3427 39.3280 208(14) 202.2001 154.2484
3428 39.3380 196(14) 195.5311 154.3385
3429 39.3480 181(13) 190.6445 154.4288
3430 39.3580 155(12) 187.4442 154.5193
3431 39.3680 173(13) 185.7751 154.6101
3432 39.3780 188(14) 184.6865 154.7010
3433 39.3880 173(13) 185.3614 154.7922
3434 39.3980 180(13) 187.1296 154.8836
3435 39.4080 204(14) 190.1405 154.9752
3436 39.4180 171(13) 194.5253 155.0670
3437 39.4280 167(13) 200.2511 155.1590
3438 39.4380 231(15) 207.3270 155.2513
3439 39.4480 203(14) 216.3395 155.3437
3440 39.4580 223(15) 229.0038 155.4364
3441 39.4680 229(15) 247.4936 155.5293
3442 39.4780 245(16) 273.2336 155.6224
3443 39.4880 264(16) 305.8922 155.7157
3444 39.4980 305(17) 342.4861 155.8092
3445 39.5080 355(19) 376.3226 155.9030
3446 39.5180 377(19) 397.0455 155.9969
3447 39.5280 415(20) 394.7214 156.0911
3448 39.5380 390(20) 368.9748 156.1855
3449 39.5480 312(18) 330.3893 156.2802
3450 39.5580 287(17) 291.0168 156.3750
3451 39.5680 231(15) 257.4250 156.4700
3452 39.5780 204(14) 231.4545 156.5653
3453 39.5880 192(14) 212.6501 156.6608
3454 39.5980 177(13) 199.7405 156.7565
3455 39.6080 203(14) 191.5573 156.8524
3456 39.6180 183(14) 186.5072 156.9486
3457 39.6280 159(13) 183.7679 157.0449
3458 39.6380 183(14) 182.5526 157.1415
3459 39.6480 157(13) 182.2360 157.2383
3460 39.6580 155(12) 182.3162 157.3353
3461 39.6680 173(13) 182.4670 157.4325
3462 39.6780 157(13) 182.0760 157.5300
3463 39.6880 179(13) 181.7278 157.6277
3464 39.6980 145(12) 181.1688 157.7255
3465 39.7080 157(13) 181.3348 157.8237
3466 39.7180 174(13) 181.2932 157.9220
3467 39.7280 163(13) 181.5866 158.0206
3468 39.7380 182(13) 182.0937 158.1193
3469 39.7480 175(13) 182.7498 158.2183
3470 39.7580 154(12) 183.6656 158.3175
3471 39.7680 173(13) 184.8426 158.4169
3472 39.7780 166(13) 185.8636 158.5166
3473 39.7880 188(14) 185.9516 158.6164
3474 39.7980 195(14) 184.7329 158.7165
3475 39.8080 192(14) 182.0678 158.8168
3476 39.8180 162(13) 178.7838 158.9174
3477 39.8280 207(14) 175.7119 159.0181
3478 39.8380 157(13) 173.1826 159.1191
3479 39.8480 165(13) 171.3532 159.2203
3480 39.8580 143(12) 170.1480 159.3217
3481 39.8680 157(13) 169.5416 159.4233
3482 39.8780 156(12) 169.5105 159.5251
3483 39.8880 165(13) 170.0394 159.6272
3484 39.8980 149(12) 170.7273 159.7295
3485 39.9080 150(12) 172.2524 159.8320
3486 39.9180 154(12) 174.0901 159.9348
3487 39.9280 157(13) 175.9664 160.0377
3488 39.9380 151(12) 177.4668 160.1409
3489 39.9480 157(13) 178.2342 160.2443
3490 39.9580 169(13) 178.0571 160.3479
3491 39.9680 171(13) 176.9336 160.4518
3492 39.9780 178(13) 175.1551 160.5559
3493 39.9880 155(12) 173.2647 160.6602
3494 39.9980 156(12) 160.7647 160.7647

_pd_proc_number_of_points   3494
 
loop_                          
      _refln_index_h           
      _refln_index_k           
      _refln_index_l           
      _refln_mult              
      _pd_refln_phase_id       
      _refln_observed_status   
      _refln_F_squared_meas    
      _refln_F_squared_calc    
      _refln_phase_calc        
      _refln_d_spacing         
  -1   0   1  2  2  o        180.1850      188.1579  181.24   6.86225
   1   1   0  4  2  o        629.0613      718.0967  182.36   6.71716
   1   0   1  8  1  o      29499.2598    30669.5938    2.20   6.36834
   0   1   1  4  2  o      18061.3242    16827.5625    2.55   5.99090
  -1   1   1  4  2  o      28465.7695    27238.0078    2.50   5.80072
   0   2   0  2  2  o       3880.8413     3585.6873  181.89   5.42854
   1   0   1  2  2  o       7669.9175     8720.5176  182.00   4.72030
   1   2   0  4  2  o      13671.2363    12819.6582  185.14   4.58284
   1   0   3  8  1  o      12325.9775    12419.2266  184.02   4.43885
   0   0   4  2  1  o       5812.3496     4641.4751  187.25   4.37727
   0   2   1  4  2  o        703.0045      709.0298  183.25   4.33097
   1   1   1  4  2  o       6529.7871     6605.3496  185.48   4.32887
   2   0   0  2  2  o      14456.5186    14472.0215  183.95   4.27498
  -1   2   1  4  2  o          1.5137        1.3493  358.62   4.25746
   1   1   2  8  1  o       7610.3120     6298.1484    7.23   4.23187
  -2   1   1  4  2  o       3796.3525     3681.0620  186.14   4.11920
   2   1   0  4  2  o       3096.5137     3576.6619    2.73   3.97773
  -1   1   2  4  2  o        106.9721       65.7164  176.99   3.62660
   0   0   2  2  2  o       6077.6318     4098.2480    8.80   3.59176
   1   2   1  4  2  o        404.3490      192.8085    2.03   3.56202
  -2   2   1  4  2  o        140.0283      121.4031  190.76   3.44243
  -2   0   2  2  2  o       8011.3354     7854.7729  186.94   3.43113
   2   0   0  4  1  o     107423.9766   108361.5234    1.96   3.41829
   0   1   2  4  2  o       1619.1810     1767.7202  183.20   3.41000
   2   2   0  4  2  o       1514.6816     1524.4520    2.96   3.35858
   1   3   0  4  2  o       2141.8804     1638.8945    2.52   3.33276
  -2   1   2  4  2  o         27.0622       12.5555  350.70   3.27164
   0   3   1  4  2  o      24289.0098    23125.4258  183.20   3.23203
  -1   3   1  4  2  o       5648.6274     4710.4775    3.25   3.20114
   2   0   2  8  1  o       2774.3296     2359.5598    2.09   3.18417
  -1   2   2  4  2  o     163324.1406   158719.6562    1.86   3.13908
   1   0   5  8  1  o      71489.8984    69041.3125  181.90   3.11674
   2   1   1  4  2  o      57233.2383    64681.5898  181.76   3.06821
  -3   0   1  2  2  o       5790.5024     6723.3081    2.79   3.05670
   2   1   1 16  1  o      40734.2812    38443.1953    2.48   3.01184
   0   2   2  4  2  o       1083.0481     1171.5039  183.17   2.99545
  -3   1   1  4  2  o      67795.0859    65751.6484  182.11   2.94232
  -2   2   2  4  2  o         22.6739       14.3207   29.35   2.90036
   1   3   1  4  2  o       3387.4954     3394.7351  184.94   2.87204
   1   1   2  4  2  o        755.7103      811.4836  186.24   2.84759
  -2   3   1  4  2  o       2745.0542     2768.8181    9.63   2.80825
   2   3   0  4  2  o       1097.6798     1300.7010    2.64   2.76216
   3   1   0  4  2  o        477.9088      458.5577    9.13   2.75659
   2   2   1  4  2  o        324.9779      302.6181   14.97   2.75579
   0   4   0  2  2  o     138541.6250   137719.2188  181.92   2.71427
   2   1   3 16  1  o        581.7040      627.6557  166.19   2.70830
   2   0   4  8  1  o      30367.1641    30430.7793  183.40   2.69413
  -3   1   2  4  2  o        503.0939      512.5263    3.73   2.69017
  -3   2   1  4  2  o        216.8216      216.8216  182.96   2.66349
  -1   3   2  4  2  o         78.5813       78.5813  355.23   2.63614
   1   2   2  4  2  o       7319.6611     7508.6704  184.97   2.59261
   1   4   0  4  2  o       5156.2842     5701.3267    2.83   2.58704
  -1   0   3  2  2  o       1899.5792     1899.5792    3.57   2.55973
   0   3   2  4  2  o        471.2110      648.7808  182.87   2.54934
   0   4   1  4  2  o        932.9685     1106.2491  179.58   2.53907
  -1   4   1  4  2  o         88.0333       95.2804    1.49   2.52400
   3   2   0  4  2  o      12584.7080    13618.9434    3.91   2.52337
   1   1   6  8  1  o      43254.1953    43518.0273  182.99   2.49828
  -1   1   3  4  2  o      19114.7910    18749.7676    3.05   2.49142
  -2   3   2  4  2  o       1044.9764     1018.2784  359.67   2.48995
  -3   2   2  4  2  o       7973.6870     7556.1016  185.70   2.47212
  -2   1   3  4  2  o        189.2356      189.2356  336.82   2.44943
   2   2   0  4  1  o       4830.2373     4555.6206  187.90   2.41709
   2   3   1  4  2  o      46567.2148    50828.5742    2.53   2.39667
   3   0   1  2  2  o      14550.8291    15545.3779    2.98   2.37048
   2   0   2  2  2  o         93.1430      131.8051  221.93   2.36015
   1   4   1  4  2  o       4033.1648     4369.0952    2.58   2.35300
   1   0   7  8  1  o       6921.6587     7591.8945    4.34   2.34901
   0   1   3  4  2  o       8131.0728     8157.5957    4.11   2.33831
  -3   3   1  4  2  o      25824.3066    25856.5781  182.34   2.33521
  -2   4   1  4  2  o        532.5486      642.6885  178.96   2.31753
   3   1   1  4  2  o       2699.6038     3107.8027    6.48   2.31592
  -1   2   3  4  2  o         24.3296       27.5109  183.53   2.31525
   2   1   2  4  2  o       8927.8770     9499.1309    2.83   2.30628
   2   1   5 16  1  o       6451.7368     6937.5703  184.80   2.30311
   2   4   0  4  2  o       4105.2544     4590.1143  173.71   2.29142
  -3   0   3  2  2  o         65.5917       71.8425  173.82   2.28742
   1   3   2  4  2  o       3395.1318     3689.9563    4.07   2.28700
  -2   2   3  4  2  o       4723.3862     5447.4492    0.83   2.28143
   3   0   1  8  1  o      15032.6777    14327.8076    3.22   2.25980
  -4   1   1  4  2  o      17050.3223    16868.2715    2.59   2.23918
   3   3   0  4  2  o       2200.6946     2179.5420  185.51   2.23905
  -3   1   3  4  2  o      15316.8770    15259.7783  183.63   2.23828
  -4   0   2  2  2  o        995.1474      869.5150   16.34   2.22603
   2   0   6  8  1  o          2.4042        2.0223   98.36   2.21942
  -1   4   2  4  2  o       2477.4136     2147.0386  184.72   2.21793
  -3   3   2  4  2  o        126.4731      119.9367  191.90   2.20301
   0   2   3  4  2  o        125.9261      123.5383  201.60   2.19084
   0   0   8  2  1  o      82847.5625    84724.6797    2.20   2.18864
  -4   1   2  4  2  o      11248.5918    10932.4502    1.79   2.18067
   3   2   1  4  2  o        859.3985      830.0980  182.78   2.17239
   0   4   2  4  2  o      45454.6523    42370.8320  182.57   2.16548
   2   2   2  4  2  o         94.8766       86.2892   10.64   2.16443
   4   0   0  2  2  o      42018.3516    45047.9688    2.25   2.13749
  -2   4   2  4  2  o      52376.9219    52358.8555    2.53   2.12873
   3   0   3  8  1  o      38965.6055    37788.3594  182.31   2.12278
   2   2   4  8  1  o      55714.5938    56891.6172    2.86   2.11594
   1   0   3  2  2  o       6128.8472     6222.1978  183.82   2.11498
  -4   2   1  4  2  o       6496.6450     6422.3013    3.87   2.10868
  -3   2   3  4  2  o        360.3423      356.3384  359.99   2.10793
   1   5   0  4  2  o        129.4734      121.2214    1.75   2.10460
   3   1   2 16  1  o      21845.4551    20302.1348    4.00   2.09886
   4   1   0  4  2  o       9692.6855     8990.2207  183.10   2.09723
  -1   3   3  4  2  o       2766.8403     2853.1230    4.44   2.08982
   0   5   1  4  2  o         11.9104       11.5885  322.28   2.07853
   1   1   3  4  2  o      53933.2070    57627.5781  182.03   2.07596
  -1   5   1  4  2  o      34563.6758    32445.9336  182.98   2.07024
   2   4   1  4  2  o       1123.0560     1038.1517  183.43   2.06956
  -2   3   3  4  2  o      12252.8555    10659.1377    4.60   2.06485
  -4   2   2  4  2  o       2190.7832     1970.7239  182.61   2.05960
  -3   4   1  4  2  o       5832.4199     5984.9385  182.75   2.02959
   1   4   2  4  2  o       3273.8604     2912.2959    4.05   1.99770
   0   3   3  4  2  o      34643.3438    30862.6816  182.81   1.99697
   4   2   0  4  2  o        113.8725      126.1017  187.11   1.98887
   3   3   1  4  2  o       4395.8872     4127.9941    3.51   1.98296
   2   3   2  4  2  o       5705.0376     5308.2456    2.53   1.97691
   1   5   1  4  2  o      19685.5430    18050.8535    4.02   1.97270
   1   2   3  4  2  o        795.4546      720.9318    2.57   1.97070
   3   4   0  4  2  o       9809.2910     9086.5869  182.25   1.96551
  -4   1   3  4  2  o      34927.6406    36237.4375    2.50   1.96156
  -2   5   1  4  2  o        419.0835      411.6670    9.00   1.95166
  -3   4   2  4  2  o       2483.8831     2323.4773    4.77   1.94099
   3   1   4 16  1  o         75.0346       71.8069  179.52   1.93839
   2   5   0  4  2  o       5923.2681     5953.4399  182.73   1.93599
   2   1   7 16  1  o      18187.0059    18335.3906  183.36   1.93597
  -4   3   1  4  2  o      20129.4004    20182.8633  183.20   1.93415
  -3   3   3  4  2  o       7589.2168     7541.9028  183.19   1.93357
  -2   0   4  2  2  o     126945.9062   123712.1875  182.10   1.92380
   3   0   5  8  1  o      65512.5312    62891.3398  181.93   1.91003
  -4   3   2  4  2  o       1448.5571     1493.2371    3.10   1.89607
  -2   1   4  4  2  o       1292.1289     1305.7135    2.00   1.89429
  -1   5   2  4  2  o         23.8429       22.3206  180.57   1.89105
   3   1   2  4  2  o      11150.1445    10514.2373    2.69   1.88965
   3   2   1 16  1  o      24145.0723    24063.3027  183.07   1.88510
  -1   1   4  4  2  o        199.8643      182.2343   10.93   1.87339
  -4   2   3  4  2  o      10691.4561     9773.2666    1.91   1.87204
   1   0   9  8  1  o       9603.7061     8890.1084    3.93   1.87117
  -1   4   3  4  2  o       1591.4122     1684.0793  183.49   1.86224
   0   5   2  4  2  o       5079.1553     4546.7397    2.70   1.85823
  -2   4   3  4  2  o        104.0899      103.3850  182.23   1.84451
   4   1   1  4  2  o       1182.0233     1182.3690    5.13   1.84420
   2   0   8  8  1  o      14202.3457    14461.8857    4.65   1.84320
   4   3   0  4  2  o       6814.5327     6768.8335  182.33   1.84045
  -2   5   2  4  2  o         19.2789       17.9006  167.58   1.83485
  -3   1   4  4  2  o       1712.9318     1825.0100  180.41   1.82639
   1   3   3  4  2  o      27060.6777    28660.5254  182.01   1.82602
  -5   0   1  2  2  o      15029.7744    15896.8428  183.21   1.81892
  -2   2   4  4  2  o       3222.0752     3457.4009    1.92   1.81330
   0   6   0  2  2  o      10491.3369     9399.3037    3.31   1.80951
   3   2   2  4  2  o      13053.3770    11629.8174    4.03   1.80923
   3   2   3 16  1  o       6286.4175     5760.9565    4.69   1.80334
   2   1   3  4  2  o         57.4793       49.5643  219.69   1.80028
  -5   1   2  4  2  o       3519.8447     3345.3970  183.68   1.79674
   2   5   1  4  2  o      20295.8887    19287.1309    1.93   1.79655
   0   0   4  2  2  o      11524.4355    10909.4375    3.89   1.79588
   0   4   3  4  2  o        148.5480      140.3287    6.86   1.79564
  -1   2   4  4  2  o      14464.8770    13577.8506    4.47   1.79495
  -5   1   1  4  2  o       2555.1587     2364.7190    5.68   1.79392
   3   4   1  4  2  o      11986.9297    11359.5420  183.26   1.78543
   2   4   2  4  2  o      18984.0078    17580.8184    3.12   1.78101
   0   1   4  4  2  o       8093.3989     7390.3066  183.15   1.77180
   1   6   0  4  2  o      19015.2305    17872.3066    3.74   1.77030
  -3   5   1  4  2  o      59354.0664    55840.7539    2.68   1.77022
   4   2   1  4  2  o      29957.4590    28439.8945  182.72   1.76922
   0   6   1  4  2  o        348.0524      340.2559    3.88   1.75470
  -3   2   4  4  2  o      17374.2754    16091.8467  184.89   1.75347
  -1   6   1  4  2  o         67.1717       63.2907    0.68   1.74970
  -4   4   1  4  2  o       3517.6377     3317.6702  182.39   1.74955
  -3   4   3  4  2  o        398.0237      375.8833  357.71   1.74913
   1   5   2  4  2  o         13.3482       12.6062  155.85   1.74894
  -4   3   3  4  2  o      77543.5703    72628.5938  182.29   1.74671
   3   1   6 16  1  o      49383.3125    48091.4844  182.85   1.73714
   2   2   3  4  2  o      23916.8613    23984.5547    2.72   1.73033
   3   5   0  4  2  o        542.0021      560.9989  184.39   1.72721
  -5   2   2  4  2  o      15706.9170    16260.4629    3.81   1.72719
  -5   2   1  4  2  o        630.5791      642.5309    3.27   1.72468
  -4   4   2  4  2  o      21120.9277    21347.6621  183.05   1.72122
  -5   0   3  2  2  o      12474.2109    13398.0195  182.29   1.71736
  -4   0   4  2  2  o      33492.3477    35768.7227    2.86   1.71556
  -3   5   2  4  2  o         21.8734       23.0490  185.60   1.71051
   4   0   0  4  1  o      97296.9922    98280.6562    2.28   1.70914
   0   2   4  4  2  o       2514.3423     2824.9333  182.02   1.70500
  -2   3   4  4  2  o        295.3449      310.9524  178.44   1.69871
  -5   1   3  4  2  o       8032.5967     8412.3926    4.73   1.69627
   3   3   2  4  2  o      11537.5869    11768.5869  183.43   1.69536
  -4   1   4  4  2  o        525.7113      517.7745    2.56   1.69454
   1   6   1  4  2  o        741.5771      790.6060  182.85   1.68962
   5   1   0  4  2  o       6839.8315     7258.7500  183.34   1.68917
   3   0   7  8  1  o       7259.2036     6575.8511    4.58   1.68456
  -1   3   4  4  2  o       1445.2336     1282.9478  186.05   1.68359
   4   4   0  4  2  o       3050.3855     2471.9021  188.74   1.67929
   4   0   2  8  1  o        381.0366      289.8639  179.96   1.67747
  -2   6   1  4  2  o         17.8167       14.2675   25.84   1.67634
   1   4   3  4  2  o       3844.5234     3633.7419    4.62   1.66831
   3   2   5 16  1  o      15769.6064    14692.5977    3.27   1.66739
   2   6   0  4  2  o       6067.8765     5494.7046  184.44   1.66638
   4   3   1  4  2  o       2806.2754     2575.8289  185.60   1.66230
  -1   5   3  4  2  o      15804.0352    14946.2891  184.34   1.65588
   4   1   1 16  1  o       8496.6865     7850.1919    4.35   1.65073
  -3   3   4  4  2  o       1070.3910      985.7593    0.48   1.64922
   1   1  10  8  1  o      28221.6191    28188.1758    3.64   1.64625
  -2   5   3  4  2  o          3.6740        3.6851  111.86   1.64337
   2   1   9 16  1  o      10684.5205    10327.8662    4.23   1.64135
  -1   6   2  4  2  o      68634.5703    60153.8984  182.64   1.63747
  -5   2   3  4  2  o        532.4954      465.6641    2.66   1.63738
  -4   2   4  4  2  o       3087.4443     2647.4348  182.33   1.63582
   5   2   0  4  2  o      55912.3164    60787.7812  182.15   1.63099
   2   3   3  4  2  o       7035.4697     7485.1509    4.27   1.62992
  -5   3   2  4  2  o       3098.2515     3267.1130    4.87   1.62730
  -5   3   1  4  2  o        188.7961      203.1617  170.56   1.62520
   1   1   4  4  2  o       6962.2710     6895.3296  183.20   1.62325
   2   2   8  8  1  o        126.4131      121.4340  230.24   1.62237
   0   6   2  4  2  o      13685.9932    13198.2305    2.72   1.61602
   0   3   4  4  2  o       2179.1370     2213.6294  183.70   1.60870
   0   5   3  4  2  o       6627.0112     6804.5830  182.44   1.60852
  -4   4   3  4  2  o        208.9766      225.7241  183.93   1.60717
   3   5   1  4  2  o       9832.8887    10827.8418  184.31   1.60118
  -2   6   2  4  2  o       3245.8743     3597.7947  185.11   1.60057
   4   0   2  2  2  o      31113.7988    34003.7930    2.57   1.59930
   2   5   2  4  2  o       6619.2251     7158.5835  183.84   1.59799
   4   1   3 16  1  o       6189.6978     6434.3252    5.37   1.59499
   4   0   4  8  1  o       7811.5664     7945.4604  185.69   1.59208
   3   3   2  8  1  o      23367.2012    24256.5391  183.64   1.58477
   4   1   2  4  2  o       4217.1548     4209.1958  185.61   1.58222
  -4   5   1  4  2  o       2338.8096     2353.0298  183.47   1.57515
   2   6   1  4  2  o        475.8790      477.6864  190.06   1.57496
  -3   5   3  4  2  o       9523.7305     9551.0420    5.65   1.57484
   3   0   3  2  2  o      17728.5254    17902.8711    3.90   1.57343
   1   2   4  4  2  o      13405.2051    13157.7705  183.62   1.57142
  -2   4   4  4  2  o      57568.3359    53402.7734    2.96   1.56954
   3   4   2  4  2  o        138.0962      133.1240  191.87   1.56690
   2   0  10  8  1  o       1749.6482     1874.0851    1.28   1.55837
  -1   4   4  4  2  o       2408.0354     2566.0593  184.15   1.55759
   3   1   3  4  2  o        106.0028      111.6586   18.49   1.55717
  -3   6   1  4  2  o       1126.1304     1184.6771    3.61   1.55713
  -4   5   2  4  2  o       6789.5312     6619.1177  182.74   1.55437
  -5   3   3  4  2  o       5378.9688     5589.0845    3.79   1.55153
   1   0  11  8  1  o      17293.0547    18811.2070  183.36   1.55027
  -4   3   4  4  2  o        599.2977      653.1636    0.90   1.55021
   5   3   0  4  2  o      15252.6914    16692.4609    3.11   1.54609
   1   6   2  4  2  o        622.8407      652.0589   14.02   1.54258
   5   0   1  2  2  o      12419.4551    12870.4746  184.56   1.54215
   4   4   1  4  2  o       2029.6045     2063.1924    3.86   1.54069
   3   1   8 16  1  o        768.3282      786.8738    0.37   1.53806
  -5   1   4  4  2  o       1718.3805     1844.0295  182.57   1.53559
   4   2   2  4  2  o        439.1438      466.0304  182.89   1.53411
  -3   4   4  4  2  o       1434.5421     1471.5244    5.41   1.53026
   4   2   0  8  1  o      27971.8672    28290.7090  183.67   1.52870
  -6   0   2  2  2  o      37929.7539    38142.7695  182.98   1.52835
   3   6   0  4  2  o      15316.2314    15258.1777  183.13   1.52761
   5   1   1  4  2  o       2186.1458     2177.7153  184.83   1.52683
   1   7   0  4  2  o       1220.7574     1227.7285  183.71   1.52610
  -2   1   5  4  2  o      13544.6572    13660.5732  182.89   1.52597
  -3   0   5  2  2  o       6325.2578     6642.9932  181.71   1.52455
   4   5   0  4  2  o       8720.0908     9325.9609    3.63   1.52329
   0   7   1  4  2  o      27663.0723    25824.2969    3.53   1.51608
  -3   6   2  4  2  o       1106.2755     1032.4492   12.91   1.51602
   1   5   3  4  2  o      29926.2871    28177.1699    3.38   1.51508
   2   4   3  4  2  o       3322.7234     3150.6399  183.14   1.51481
  -6   1   2  4  2  o       7417.3525     7367.0518  183.82   1.51343
  -1   7   1  4  2  o         26.3286       26.5643    0.83   1.51285
  -5   4   2  4  2  o        440.8320      446.2341  188.30   1.51270
   3   2   3  4  2  o        483.5434      494.2211  184.25   1.51123
   3   2   7 16  1  o      14238.5918    14535.7764  183.65   1.51104
  -5   4   1  4  2  o      13501.4785    13787.4609    3.21   1.51101
  -3   1   5  4  2  o       3749.5393     3830.3254  186.33   1.50974
  -1   0   5  2  2  o       7157.5234     7326.7197    3.46   1.50921
   4   2   2 16  1  o       2946.1985     3049.1028    1.43   1.50592
   4   1   5 16  1  o      21026.5195    21539.4102  183.21   1.49861
   0   4   4  4  2  o        416.7499      427.5593  197.96   1.49773
   1   3   4  4  2  o       7355.8394     7700.8301    3.96   1.49507
  -1   1   5  4  2  o       6041.3579     6366.8843    5.32   1.49484
  -6   1   1  4  2  o       2145.0608     2384.1917  184.09   1.49172
  -5   2   4  4  2  o       6868.4087     7722.7207    5.49   1.49149
   5   2   1  4  2  o        434.7711      646.7480    3.50   1.48345
  -2   2   5  4  2  o        890.9558     1361.3912    5.72   1.48267
   3   0   9  8  1  o       3793.4932     4783.8140    5.47   1.47962
  -1   6   3  4  2  o         66.8882       76.5226  174.21   1.47759
   2   0   4  2  2  o       3722.6594     5118.2236  185.68   1.47545
   4   0   6  8  1  o        593.3654      807.5266  180.04   1.47481
   1   7   1  4  2  o         96.1574      118.2855    8.19   1.47351
  -6   2   2  4  2  o        160.1468      170.5472    6.05   1.47116
  -6   1   3  4  2  o        375.5722      386.2042  192.54   1.47035
  -4   5   3  4  2  o      22654.6738    21829.7734  181.92   1.46885
  -2   6   3  4  2  o       1373.3022     1319.6534  181.50   1.46869
  -3   2   5  4  2  o          5.2277        4.9343    9.34   1.46777
  -2   7   1  4  2  o       6249.6733     5500.6963  187.64   1.46467
   4   3   2  4  2  o        361.5835      362.8159  191.06   1.46283
   2   1   4  4  2  o       9100.1826     9725.8848    3.65   1.46201
   0   0  12  2  1  o      11438.5088    15844.3008  184.41   1.45909
   2   7   0  4  2  o         90.1460      132.8876  358.91   1.45802
  -1   2   5  4  2  o          0.7506        1.2745  236.72   1.45406
  -5   4   3  4  2  o       5244.0938     6024.6289    3.18   1.45127
  -6   2   1  4  2  o      14025.4209    15974.9297  183.73   1.45120
  -4   1   5  4  2  o       5048.0054     5275.6714    4.96   1.45038
  -4   4   4  4  2  o       7621.6328     7849.8691  185.55   1.45018
   5   4   0  4  2  o       3762.8374     3888.0894    2.27   1.44681
   0   6   3  4  2  o        191.3920      199.9641   13.91   1.44366
   4   2   4 16  1  o      17868.0195    18187.8926    4.33   1.44322
   3   3   3  4  2  o       2361.4963     2370.4822  178.44   1.44296
  -2   5   4  4  2  o        683.9607      656.4141  183.94   1.43995
  -1   7   2  4  2  o         95.6934       98.4289  174.69   1.43853
   3   6   1  4  2  o       3574.2976     3703.4280    3.76   1.43834
   3   5   2  4  2  o       2739.0935     2858.3447  182.55   1.43791
   2   6   2  4  2  o       4637.5273     4697.7583  184.15   1.43602
  -6   2   3  4  2  o       1079.8096     1622.9822  188.27   1.43150
  -1   5   4  4  2  o          0.5438        1.1424  280.95   1.43071
  -5   3   4  4  2  o       2156.6584     3050.3459    2.75   1.42574
   6   0   0  2  2  o       6326.2983     8098.3486  183.46   1.42499
   0   1   5  4  2  o      29372.5664    35288.4570    2.07   1.42429
   0   7   2  4  2  o         74.3354       86.7194  179.65   1.42392
   2   2   4  4  2  o        320.9127      370.5045    3.15   1.42380
  -4   6   1  4  2  o       3683.5999     3800.8855  184.39   1.41938
  -3   6   3  4  2  o        330.1746      342.3155  179.89   1.41915
   5   3   1  4  2  o       1273.0867     1326.0367  183.36   1.41872
  -2   3   5  4  2  o       9102.6826     9506.2061    4.87   1.41803
   4   5   1  4  2  o       1971.7010     2063.8523  359.33   1.41758
  -2   7   2  4  2  o          1.4382        1.5051  354.37   1.41332
  -4   2   5  4  2  o        435.9258      456.4195  180.96   1.41305
   6   1   0  4  2  o       4090.1509     4283.1426    6.14   1.41288
   2   1  11 16  1  o      10983.3867    11438.9150    3.84   1.41186
   3   3   6  8  1  o      46035.2773    46643.8828    2.89   1.41062
  -3   5   4  4  2  o        714.2686      693.8701    0.52   1.40944
  -6   3   2  4  2  o       1129.3879     1044.1923  186.23   1.40795
  -3   3   5  4  2  o         19.5479       18.4227  235.66   1.40498
   1   4   4  4  2  o       3840.6555     3614.2983    2.95   1.40474
  -4   6   2  4  2  o      17391.6426    16196.9414    2.62   1.40412
   2   5   3  4  2  o        740.3087      637.0408    4.61   1.39734
  -5   5   2  4  2  o        187.6445      159.4586    8.71   1.39568
   2   7   1  4  2  o      50051.4023    42489.5273  183.02   1.39559
  -5   5   1  4  2  o       2444.7034     2069.9507  188.08   1.39436
  -1   3   5  4  2  o       6655.9380     5853.4414    3.76   1.39294
  -6   3   1  4  2  o       7048.2920     6178.3042    3.87   1.39042
   0   2   5  4  2  o        845.0241      841.8841  191.32   1.38889
  -6   0   4  2  2  o       8720.5381     9127.7207  185.35   1.38838
   0   5   4  4  2  o       5757.4380     5972.8638    4.26   1.38390
  -3   7   1  4  2  o       9312.5010     9673.9922    1.74   1.38314
   4   1   7 16  1  o       4877.5952     4821.4404  185.47   1.38203
   4   6   0  4  2  o        470.6422      457.4326   10.63   1.38108
   6   2   0  4  2  o         52.6070       55.4407    7.69   1.37830
   4   4   2  4  2  o      53527.2305    56096.7734  181.92   1.37790
  -6   1   4  4  2  o        371.1113      384.0273  190.33   1.37716
   1   6   3  4  2  o       2665.0085     2659.6936  183.80   1.37495
  -6   3   3  4  2  o       7082.8335     7195.0630    4.41   1.37307
   1   7   2  4  2  o       4590.7798     4690.8340  184.14   1.37292
  -5   0   5  2  2  o       8045.0566     8404.7861  181.64   1.37245
   2   3   4  4  2  o       2652.7087     2654.3938    4.31   1.36627
   4   3   1 16  1  o       6920.6445     7080.4858  184.59   1.36317
   5   0   1  8  1  o       9204.4355     9417.0244    3.96   1.36317
   3   7   0  4  2  o       1854.7358     1848.5192    6.48   1.36233
  -5   1   5  4  2  o      42462.1797    41915.1914    2.74   1.36161
   3   4   3  4  2  o      13802.6279    13603.6689  184.16   1.36125
   3   1  10 16  1  o      27524.8672    27191.0859    3.61   1.36064
   3   2   9 16  1  o       6793.8818     6797.5190  185.23   1.35787
   0   8   0  2  2  o      88660.3359    88119.9375    1.96   1.35714
  -4   3   5  4  2  o       2876.9692     2855.8076  189.42   1.35676
   4   1   3  4  2  o       2193.9087     2185.5854    3.31   1.35627
   4   2   6 16  1  o       1514.4407     1530.2994    1.64   1.35415
  -3   7   2  4  2  o        726.2820      734.1877    5.88   1.35409
   5   1   2  4  2  o       7577.7051     7626.2627  184.00   1.35307
   4   0   8  8  1  o      20385.0996    21800.7988    4.14   1.34706
  -5   5   3  4  2  o       8590.7285     9169.3193  185.46   1.34700
  -5   4   4  4  2  o       4671.4385     4934.1084  183.37   1.34677
  -4   5   4  4  2  o       3440.2229     3569.9895  181.53   1.34613
  -6   2   4  4  2  o        905.4423      940.9822    3.26   1.34508
   5   5   0  4  2  o       1549.0663     1677.5063    3.09   1.34343
   2   0  12  8  1  o      21468.6445    23422.3750  183.88   1.34195
   5   4   1  4  2  o       8532.9170     8977.6250    5.04   1.34084
   1   8   0  4  2  o       2276.3667     2323.0234  188.12   1.34036
  -2   4   5  4  2  o        138.0422      140.0330  184.81   1.34027
  -4   6   3  4  2  o       5914.7637     5942.9302  182.12   1.34012
   1   0   5  2  2  o      14137.3428    13728.1123  184.07   1.33959
   0   3   5  4  2  o      31403.2930    28980.8184  182.90   1.33533
   0   8   1  4  2  o        701.2446      706.5755  359.02   1.33355
  -6   4   2  4  2  o      61426.6797    65495.8125    2.17   1.33174
  -1   8   1  4  2  o          7.6952        8.1104  357.63   1.33135
   4   3   3 16  1  o      11923.3154    12502.7539  183.85   1.33127
   5   0   3  8  1  o       6035.9067     6329.2344  185.32   1.33127
  -5   2   5  4  2  o        406.0103      419.3753    0.90   1.33058
   1   1   5  4  2  o        135.5990      139.3358  203.76   1.32950
  -3   4   5  4  2  o       3526.3323     3626.5000    2.16   1.32923
  -1   7   3  4  2  o        944.1423     1009.9210  359.50   1.32650
   6   3   0  4  2  o       1846.4578     1941.7770    5.41   1.32591
   4   2   3  4  2  o      12778.2959    13276.5664  184.65   1.32560
   5   1   2 16  1  o       8058.1919     8314.8203    6.18   1.32531
   5   2   2  4  2  o       3608.9265     4061.1113  183.69   1.32260
   1   0  13  8  1  o       9223.1699    10203.8086  184.13   1.32145
  -2   7   3  4  2  o       8666.1748     8941.7236  185.90   1.32005
  -1   4   5  4  2  o       5586.7358     5539.3433  183.65   1.31902
  -2   6   4  4  2  o       5076.8340     4814.0391  184.55   1.31807
  -6   4   1  4  2  o        723.2327      665.5707    6.32   1.31688
   3   6   2  4  2  o       2824.3147     2584.5540  187.29   1.31651
  -1   6   4  4  2  o      10637.1182     8653.6680  184.78   1.31097
   1   5   4  4  2  o       3039.7644     2661.1978    2.78   1.30955
   3   1   4  4  2  o       2632.9973     2339.2717    6.27   1.30909
   3   0  11  8  1  o      28779.5469    27594.2695  182.80   1.30493
   1   8   1  4  2  o       1095.8754     1025.2084  183.86   1.30430
  -6   4   3  4  2  o       2133.8235     1811.8234    3.47   1.30211
   0   7   3  4  2  o      13905.0908    11625.9609    5.01   1.30178
  -7   1   2  4  2  o       8043.0181     6513.0830    3.79   1.30103
   4   6   1  4  2  o      17801.2637    14313.5410    3.30   1.30085
   1   2   5  4  2  o        668.6940      532.6180    4.19   1.30057
   6   1   1  4  2  o       1048.6080      833.3359  185.74   1.30050
  -2   8   1  4  2  o       1247.5907      928.5279  358.45   1.29816
   3   7   1  4  2  o        320.8429      237.9142  183.58   1.29788
   2   4   4  4  2  o        525.6688      379.4995   19.48   1.29630
  -6   3   4  4  2  o       2469.0942     1780.4625  183.26   1.29626
   2   7   2  4  2  o       1368.6028      984.5957  182.06   1.29617
  -7   0   3  2  2  o      13850.0137     9723.4336    4.38   1.29485
  -3   6   4  4  2  o      15551.6172    10870.0361    5.10   1.29455
   2   8   0  4  2  o       3403.3967     2326.1279  186.71   1.29352
  -4   4   5  4  2  o         99.2197       83.7289    2.38   1.28818
   4   5   2  4  2  o       8707.7432     7213.1812    5.44   1.28772
  -7   1   3  4  2  o       5049.7324     3971.7705  184.52   1.28574
   2   6   3  4  2  o      16535.8125    13002.4658  183.21   1.28515
  -4   7   1  4  2  o      19748.0410    15649.8945    4.06   1.28390
  -5   6   2  4  2  o       4535.1685     3595.9487  186.88   1.28386
  -3   7   3  4  2  o         29.8742       23.7437  167.34   1.28373
  -7   0   1  2  2  o       6685.1631     5325.1289    7.14   1.28361
  -5   3   5  4  2  o      28754.0977    23078.9668    2.54   1.28327
  -5   6   1  4  2  o       6256.1001     5083.9146  183.33   1.28283
   5   1   4 16  1  o          2.0963        1.7702  182.75   1.28197
   3   2   4  4  2  o      35418.4609    30689.8242    2.30   1.28144
  -2   0   6  2  2  o       6632.0801     5761.7070  186.46   1.27986
  -1   8   2  4  2  o      15901.7412    13813.1064    3.48   1.27985
   4   3   3  4  2  o      14728.1670    12831.7520  182.04   1.27879
   5   3   2  4  2  o      15629.9502    15603.0557    3.98   1.27611
  -7   1   1  4  2  o        890.2249      921.6115  187.37   1.27474
   0   6   4  4  2  o       3261.0974     3370.3188    5.17   1.27467
   3   5   3  4  2  o        297.3600      299.9137  344.58   1.27410
  -7   2   2  4  2  o       8569.5879     8540.0195  184.03   1.27388
  -3   1   6  4  2  o        213.1694      210.3068  354.77   1.27368
   4   3   5 16  1  o      22390.6387    22047.3184    3.09   1.27367
   5   0   5  8  1  o      23258.0586    22901.4395  183.10   1.27367
   6   2   1  4  2  o      14092.6611    13730.7764    4.61   1.27338
  -4   7   2  4  2  o        986.0817      943.7785  181.23   1.27257
  -2   1   6  4  2  o       7010.1860     6846.1885    2.91   1.27106
   0   4   5  4  2  o        704.6226      730.2488    5.74   1.26979
   0   8   2  4  2  o       2291.5479     2397.9912    8.24   1.26953
   5   2   1 16  1  o      14306.6562    15065.1885  183.69   1.26620
  -5   5   4  4  2  o        701.3798      741.2238    1.90   1.26220
  -2   8   2  4  2  o       4081.0151     4304.3130  186.76   1.26200
   4   1   9 16  1  o       3263.6829     3432.7515    6.34   1.26195
   6   4   0  4  2  o         55.6140       58.4833   39.90   1.26169
  -7   2   3  4  2  o         82.1007       78.8451  188.71   1.25952
  -6   1   5  4  2  o      13600.8252    12909.2402  183.47   1.25914
   5   5   1  4  2  o      13913.3574    13302.5947    2.60   1.25732
  -4   0   6  2  2  o      15448.7158    14771.3389    5.25   1.25713
  -2   5   5  4  2  o        351.0190      335.5692    7.64   1.25685
   1   3   5  4  2  o         57.0607       54.8719  201.64   1.25629
   4   7   0  4  2  o        218.0142      221.8275    3.72   1.25534
   4   2   8 16  1  o       5121.6865     5555.3223  187.37   1.25326
   1   7   3  4  2  o       6926.0605     7276.2842    1.81   1.25074
  -6   5   2  4  2  o       6383.8652     6489.9653    5.00   1.24981
   2   8   1  4  2  o       3208.5156     3154.1321    3.67   1.24933
  -7   2   1  4  2  o         42.4785       41.2166  194.34   1.24917
   2   2  12  8  1  o      30626.7285    29523.9922    3.65   1.24914
  -4   1   6  4  2  o         36.9500       34.7056  190.09   1.24878
  -3   2   6  4  2  o      68561.4531    60879.7773  182.81   1.24817
  -3   5   5  4  2  o      20417.8828    17445.6914    3.93   1.24773
  -2   2   6  4  2  o         76.5191       63.2511  167.24   1.24571
  -5   6   3  4  2  o       4732.4971     3918.9253  182.65   1.24566
  -4   6   4  4  2  o       5234.4580     4461.7227    5.03   1.24498
   5   6   0  4  2  o      53153.8906    49499.2344    2.11   1.24284
  -1   1   6  4  2  o       6045.2251     5853.3032    3.56   1.24143
   5   2   3 16  1  o        615.9398      592.4662   14.54   1.24051
  -3   8   1  4  2  o       2026.0454     1949.9935    3.74   1.24038
  -1   5   5  4  2  o      14405.3281    13317.5352  184.38   1.23928
   3   3   4  4  2  o       8116.0337     7418.3062  185.14   1.23902
  -6   5   1  4  2  o         11.3639        9.7775   20.07   1.23750
  -6   4   4  4  2  o        952.1127      888.6127   15.86   1.23606
  -6   2   5  4  2  o       1166.2039     1329.5371  185.56   1.23448
   1   8   2  4  2  o      12228.6035    14259.9639  183.43   1.23299
  -7   1   4  4  2  o       1743.5850     2030.0240    5.60   1.23296
   2   1  13 16  1  o       2615.0525     2938.6450  187.04   1.23256
  -7   3   2  4  2  o       7231.6855     7945.1475  184.88   1.23218
   6   3   1  4  2  o         36.2566       38.6637  145.42   1.23173
   2   1   5  4  2  o          8.2218        7.7363  222.25   1.22545
   3   8   0  4  2  o       8846.6885     8259.5488    4.34   1.22530
  -6   5   3  4  2  o         36.6281       34.0357   13.66   1.22522
  -5   4   5  4  2  o       9984.1699     9071.5674    1.50   1.22478
  -4   2   6  4  2  o         20.0947       18.2073  335.59   1.22472
  -4   7   3  4  2  o      50683.7422    45431.9922    3.14   1.22435
   4   0  10  8  1  o         14.1624       13.2897    0.41   1.22305
   4   4   3  4  2  o       1370.2869     1407.8038    4.86   1.22089
   2   5   4  4  2  o      11413.3096    11739.5957  184.07   1.22038
  -3   8   2  4  2  o      13593.2148    13486.8652  183.71   1.21930
  -7   3   3  4  2  o       2082.4561     2049.5720  183.28   1.21916
   3   2  11 16  1  o      18396.2539    17992.5684    3.13   1.21912
   5   4   2  4  2  o        147.3715      139.1637    8.14   1.21855
   5   1   6 16  1  o      23420.9785    21826.9727  184.02   1.21832
  -1   2   6  4  2  o       1238.1407     1121.6399   10.71   1.21778
   1   6   4  4  2  o      10051.8232     8974.7041    3.71   1.21587
   7   1   0  4  2  o       4930.4863     4967.3232    5.22   1.21377
  -4   5   5  4  2  o         85.8472       87.2790  343.11   1.21359
   1   1  14  8  1  o       6519.0869     7490.0649  186.32   1.21079
  -7   2   4  4  2  o      52274.1172    59236.6016  182.54   1.20978
  -7   3   1  4  2  o         30.2854       34.3066  333.94   1.20977
   3   1  12 16  1  o         48.3722       53.6932  178.94   1.20942
  -3   3   6  4  2  o          4.7059        5.0968   87.69   1.20887
   4   4   0  4  1  o      37948.6289    40321.8945    3.35   1.20855
  -2   7   4  4  2  o        190.7645      194.6743    1.35   1.20746
  -2   3   6  4  2  o       4287.2422     4314.8169    2.22   1.20663
   3   7   2  4  2  o       9108.2607     9071.9688    4.30   1.20626
   2   2   5  4  2  o      29182.7363    30581.3262    3.25   1.20269
  -1   7   4  4  2  o       3227.1819     3409.3989    4.47   1.20200
   1   4   5  4  2  o      11104.3652    11935.6670    4.09   1.20125
  -5   1   6  4  2  o         15.9181       17.2747    0.51   1.20088
   5   0   3  2  2  o      17108.3984    18632.3535  184.16   1.20061
   4   3   7 16  1  o       4632.4487     4970.6274    5.31   1.19976
   5   0   7  8  1  o       4859.0430     5213.7632    5.32   1.19976
  -1   8   3  4  2  o        569.5176      600.3400    4.37   1.19903
   4   6   2  4  2  o       4827.5845     5100.2759    2.53   1.19834
   0   5   5  4  2  o       6089.0366     6459.8110  182.80   1.19818
   0   0   6  2  2  o       5972.9722     6701.1299    4.79   1.19725
  -6   3   5  4  2  o       7225.4653     8643.7529    5.55   1.19642
   1   9   0  4  2  o         18.2826       21.4139    5.32   1.19451
  -2   8   3  4  2  o        252.9843      289.6316    2.50   1.19426
   4   7   1  4  2  o       5136.4521     5834.4810    4.53   1.19418
   5   2   5 16  1  o       6823.7427     7325.3208    4.67   1.19351
   5   1   3  4  2  o       3096.2244     3272.2258  182.73   1.19334
   7   2   0  4  2  o       4334.2510     4566.2969  178.86   1.19163
   6   5   0  4  2  o       9092.7754     9724.9072  185.20   1.19136
   0   1   6  4  2  o       1016.6002     1163.5522  189.94   1.19004
   0   9   1  4  2  o       2347.5054     2672.5146  182.18   1.18968
  -3   7   4  4  2  o        257.9995      291.2747  180.39   1.18930
  -1   9   1  4  2  o      16484.9570    18295.7012    4.26   1.18812
  -4   3   6  4  2  o        560.5740      619.5831  181.57   1.18752
   3   6   3  4  2  o       3411.7063     3771.4976    4.40   1.18734
   3   4   4  4  2  o        527.8824      575.6484  184.32   1.18613
   3   3  10  8  1  o      22643.3320    24629.4766  183.71   1.18569
   6   0   2  2  2  o       8623.3623     9360.1963  359.87   1.18524
   2   7   3  4  2  o       2739.8052     4115.8423  186.56   1.18200
  -1   3   6  4  2  o       4101.7012     6894.1973  184.33   1.18120
  -5   7   2  4  2  o       2025.5984     3451.7336  185.11   1.18100
   0   8   3  4  2  o        239.2960      409.7646  187.40   1.18069
  -5   7   1  4  2  o        228.0897      373.6179    1.55   1.18020
  -7   4   2  4  2  o        217.8919      353.2680    6.80   1.18012
   4   0   4  2  2  o       3664.6953     5897.7114    2.22   1.18007
   6   4   1  4  2  o        972.1557     1487.6285  185.09   1.17973
  -5   2   6  4  2  o       4825.9634     7110.3252    6.46   1.17943
   6   1   2  4  2  o      11397.2344    14275.3477    3.99   1.17824
   3   8   1  4  2  o       5272.3159     6315.7930    3.52   1.17777
  -5   6   4  4  2  o       5248.8643     6276.8384  185.12   1.17769
   2   8   2  4  2  o        733.6232     1274.8630  188.63   1.17650
   2   0  14  8  1  o        134.1540      134.1540  178.19   1.17451
  -7   3   4  4  2  o       5221.4141     5221.4141  184.72   1.17389
   0   7   4  4  2  o        833.2270      833.2270    1.96   1.17383
   5   6   1  4  2  o       1772.7770     1772.7770  185.96   1.17372
  -2   6   5  4  2  o        300.3035     1150.2037  185.24   1.17334
   4   1   4  4  2  o       3120.2678     9223.2188  184.70   1.17316
   5   2   3  4  2  o        121.7010      258.8592    6.61   1.17228
 
# The following lines are used to test the character set of files sent by     
# network email or other means. They are not part of the CIF data set.        
# abcdefghijklmnopqrstuvwxyzABCDEFGHIJKLMNOPQRSTUVWXYZ0123456789              
# !@#$%^&*()_+{}:"~<>?|\-=[];'`,./ 
 
#=============================================================================
 
#=============================================================================
# Additional structures (last six sections and associated data_? identifiers) 
# may be added at this point.                                                 
#=============================================================================
 
# The following lines are used to test the character set of files sent by     
# network email or other means. They are not part of the CIF data set.        
# abcdefghijklmnopqrstuvwxyzABCDEFGHIJKLMNOPQRSTUVWXYZ0123456789              
# !@#$%^&*()_+{}:"~<>?|\-=[];'`,./ 
